# Supplementary material for: Impact of the implementation of a fast-track on emergency department length of stay and quality of care indicators in the Champagne-Ardenne region: a before–after study
Source: PubMed Central journal article supplement — BMJ Open. 2019 Jun 19;9(6):e026200. doi: 10.1136/bmjopen-2018-026200 (PMC6588991; doi:10.1136/bmjopen-2018-026200), 2019-06-19
Supplement: bmjopen-2018-026200.draft_revisions.pdf [file bmjopen-2018-026200.draft_revisions.pdf]

# BMJ Open

BMJ Open is committed to open peer review. As part of this commitment we make the peer review history of every article we publish publicly available.

When an article is published we post the peer reviewers' comments and the authors' responses online. We also post the versions of the paper that were used during peer review. These are the versions that the peer review comments apply to.

The versions of the paper that follow are the versions that were submitted during the peer review process. They are not the versions of record or the final published versions. They should not be cited or distributed as the published version of this manuscript.

BMJ Open is an open access journal and the full, final, typeset and author-corrected version of record of the manuscript is available on our site with no access controls, subscription charges or pay-per-view fees (<http://bmjopen.bmj.com>).

If you have any questions on BMJ Open's open peer review process please email [info.bmjopen@bmj.com](mailto:info.bmjopen@bmj.com)

# BMJ Open

## Impact of the implementation of a fast-track on emergency department length of stay and quality of care indicators

|                               |                                                                                                                                                                                                                                                                                                                                                                                                                                                                                                                                                                                                                                                                                                                                                                                                                    |
|-------------------------------|--------------------------------------------------------------------------------------------------------------------------------------------------------------------------------------------------------------------------------------------------------------------------------------------------------------------------------------------------------------------------------------------------------------------------------------------------------------------------------------------------------------------------------------------------------------------------------------------------------------------------------------------------------------------------------------------------------------------------------------------------------------------------------------------------------------------|
| Journal:                      | <i>BMJ Open</i>                                                                                                                                                                                                                                                                                                                                                                                                                                                                                                                                                                                                                                                                                                                                                                                                    |
| Manuscript ID                 | bmjopen-2018-026200                                                                                                                                                                                                                                                                                                                                                                                                                                                                                                                                                                                                                                                                                                                                                                                                |
| Article Type:                 | Research                                                                                                                                                                                                                                                                                                                                                                                                                                                                                                                                                                                                                                                                                                                                                                                                           |
| Date Submitted by the Author: | 27-Aug-2018                                                                                                                                                                                                                                                                                                                                                                                                                                                                                                                                                                                                                                                                                                                                                                                                        |
| Complete List of Authors:     | Chrusciel, Jan; Centre Hospitalier de Troyes, Department of Medical Information and Performance Evaluation; University Hospitals of Reims, Department of Research and Public Health<br>Fontaine, Xavier; Manchester Hospital, Emergency Department<br>Devillard, Arnaud; Centre Hospitalier de Troyes, Emergency Department<br>Cordonnier, Aurélien; Manchester Hospital, Department of Medical Information<br>Kanagaratnam, Lukshe; University Hospitals of Reims, Department of Research and Public Health; Université de Reims Champagne-Ardenne, Faculty of Medicine, EA 3797<br>Laplanche, David; Centre Hospitalier de Troyes, Department of Medical Information and Performance Evaluation<br>Sanchez, Stéphane; Centre Hospitalier de Troyes, Department of Medical Information and Performance Evaluation |
| Keywords:                     | Emergency Department, Length of stay, Fast-track, Hospital readmissions, Healthcare Quality                                                                                                                                                                                                                                                                                                                                                                                                                                                                                                                                                                                                                                                                                                                        |
|                               |                                                                                                                                                                                                                                                                                                                                                                                                                                                                                                                                                                                                                                                                                                                                                                                                                    |

SCHOLARONE™  
Manuscripts

only

# Impact of the implementation of a fast-track on emergency department length of stay and quality of care indicators

Jan Chrusciel<sup>1,5</sup>, Xavier Fontaine<sup>2</sup>, Arnaud Devillard<sup>3</sup>, Aurélien Cordonnier<sup>4</sup>, Lukshe Kanagaratnam<sup>5,6</sup>, David Laplanche<sup>1</sup>, Stéphane Sanchez<sup>1</sup>

<sup>1</sup>Department of Medical Information and Performance Evaluation, Centre Hospitalier de Troyes, Troyes, France; <sup>2</sup>Emergency Department, Manchester Hospital, Charleville-Mézières, France; <sup>3</sup>Emergency Department, Centre Hospitalier de Troyes, Troyes, France; <sup>4</sup>Medical Information Department, Manchester Hospital, Charleville-Mézières, France. <sup>5</sup>Department of Research and Public Health, University Hospitals of Reims, Reims, France; <sup>6</sup>Faculty of Medicine, EA 3797, University of Reims Champagne-Ardenne, Reims, France

## Abstract

**Objectives:** We aimed to evaluate the effect of the implementation of a fast-track on Emergency Department (ED) length of stay (LOS) and quality of care indicators.

**Design:** Difference-in-differences analysis.

**Setting:** Two large hospitals in the Champagne-Ardenne region, France.

**Participants:** Patients admitted to the emergency department between 13 January 2015 and 13 January 2017.

**Intervention:** Implementation of a fast-track for patients with small injuries or benign medical conditions, extension of the ED from 15 to 27 consultation rooms (13 January 2016).

**Primary and Secondary Outcome Measures:** Proportion of patients with LOS < 4h and proportion of access block situations (when patients cannot access an appropriate hospital bed within a reasonable amount of time: 8 hours). All-cause 7-day readmissions and 30-days readmissions.

**Results:** The emergency department of the intervention hospital registered 53768 stays in 2016 and 57965 in 2017 (+7.8%). During the same period, the control hospital registered 42133 and 43696 entries respectively (+3.7%). In the intervention hospital, the mean length of stay was 261 minutes before the intervention and 248 minutes after the intervention.

In the control hospital, the corresponding times were 262 and 265 minutes (exponentiated difference-in-differences (DID) estimator for ED LOS > 4h: 0.80; 95% confidence interval (CI) 0.76 – 0.84). The exponentiated DID estimator for access block was 1.12; 95% CI 1.03 – 1.22. In the intervention hospital, before the fast-track was implemented, an estimated 11.4% of admissions were 30-days readmissions. There was an increase in this proportion after the intervention (12.3%), also observed in the control group (from 12.0% to 12.6%).

**Conclusions:** The implementation of a fast-track was associated with a decrease in stays lasting ≥4 hours without a decrease in access block. Further studies are needed to evaluate the causes of variability in emergency department LOS and their connections to quality of care indicators.

Correspondence to: Jan Chrusciel, Department of Medical Information and Performance Evaluation, Centre Hospitalier de Troyes, 101 Avenue Anatole France, 10003 Troyes, France.

Tel: +33 (0) 3 26 78 77 63. Fax: + 33 (0) 3 25 49 49 50. E-mail: [jan.chrusciel.md@gmail.com](mailto:jan.chrusciel.md@gmail.com)

## Keywords

Emergency Department – Length of stay – Fast-track – Hospital readmissions – Healthcare Quality

**Word count: 3276**

### Strengths and Limitations of this study

- We measured the effect of the implementation of a fast-track on length of stay and quality of care indicators
- Regional trends were controlled for using a difference-in-differences approach
- The intervention was the only major change in the intervention hospital. No structural changes took place in the control hospital during the study period
- Further studies could include more hospitals in the control group

### Introduction

The number of annual emergency department (ED) visits has doubled between 1980 and 2004 in France [1], and is still rising (+3.7% between 2014 and 2015). This phenomenon has been observed in most developed countries [2], and is a challenge for physicians and policymakers. ED crowding was defined by the American College of Emergency Physicians (ACEP) as a mismatch between the need for emergency care and the emergency department's ability to provide this care [3]. ED crowding has been associated with longer ED length of stay (LOS) [4], inadequate pain management [5], and worse patient outcomes [6]. A crowded emergency department may sometimes need to fall back on ambulance diversion, redirecting patient flow to nearby hospitals. Moreover, overcrowding can worsen the impact of a public health crisis (terrorist attacks, epidemics ...) [7]. Emergency departments are known to depend on hospital bed availability, and a hospital restructuring (sometimes driven by financial reasons) can impend the performance of an ED [8]. Finding the best organization for EDs is therefore a public health priority with ethical implications [3]. The causes of ED crowding include increased demand from patients, epidemics, lack of trained staff, and lack of hospital beds [9]. Numerous scores have been

1  
2  
3 proposed to measure ED crowding (EDWIN, NEDOCs, READI, Work Score) however their  
4  
5 predictive power typically does not outperform simpler indicators such as bed occupancy  
6  
7 [10,11]. Time series analysis can predict emergency department activity with a Relative  
8  
9 Mean Absolute Performance (RMAP) of 90% [12]. A shorter length of stay results in less  
10  
11 complications [13,14], higher odds of survival for severe patients [15], increased patient  
12  
13 satisfaction [16,17], and lower healthcare spending [18]. It was also found to be associated  
14  
15 with a shorter hospital stay (if the patient is admitted to the hospital thereafter)[19].  
16  
17 Emergency department LOS is therefore a healthcare quality indicator [20]. The  
18  
19 optimization of patient flow has been studied extensively [21,22]. Numerous strategies have  
20  
21 been proposed to regulate patient flow in the emergency department : Care Coordination  
22  
23 Teams, whose mission involves orienting older patients towards appropriate healthcare,  
24  
25 observation units (caring for patients up to 72h), chest pain units, home-based healthcare  
26  
27 [23]. A common strategy is the use of fast-tracks, dedicated pathways aimed towards the  
28  
29 fast delivery of healthcare for patients with benign medical conditions scheduled for rapid  
30  
31 discharge. Fast-tracks have been implemented in small and larger hospitals [24]. In 2002,  
32  
33 58% of 17 surveyed Australian public hospitals functioned with a fast-track [23]. A Monte-  
34  
35 Carlo simulation showed that implementing a fast-track with a dedicated nurse could  
36  
37 shorten median waiting times up to 35% [25]. Previous studies have evaluated the effect of  
38  
39 implementing a fast-track [26–29], however the lengths of these studies were short,  
40  
41 typically less than 6 months. One 2-year study with a fast-track staffed with mid-level  
42  
43 providers did not adjust for patient severity or regional trends [30]. The aim of this study  
44  
45 was to assess the impact of an emergency department restructuring with the  
46  
47 implementation of a fast-track on ED length of stay in the setting of a large hospital in  
48  
49 France. Secondary objectives were to study predictors of ED LOS, and to assess the effect of  
50  
51  
52  
53  
54  
55  
56  
57  
58  
59  
60

1  
2  
3 the emergency department restructuring on 7-day readmissions, 30-day readmissions,  
4  
5 and the proportion of patients leaving without being seen.  
6  
7

## 8 9 **Methods**

10  
11 We conducted a difference-in-differences analysis [31,32]. This method is classically used in  
12  
13 economics[33] and involves a control group to attempt to model the counterfactual: what  
14  
15 would have happened if the intervention group had continued evolving with a common  
16  
17 trend with the control group before the intervention.  
18  
19  
20  
21  
22

## 23 24 **Population**

25  
26 The region in which the study takes place is one of the least densely populated regions in  
27  
28 France. The age structure of the region resembles the pooled age structure of the rest of the  
29  
30 country. The intervention hospital (Troyes Hospital) was a large hospital with 442 medical  
31  
32 beds, 127 surgical beds and 63 beds dedicated to gynaecology and obstetrics, serving an  
33  
34 area of approximately 40 kilometres radius (25 miles). The emergency department hosts an  
35  
36 observation unit. The control hospital (Manchester Hospital, located in Charleville-Mézières)  
37  
38 was in the same region, and had 375 medical bed, 101 surgical beds, and 63 beds for  
39  
40 gynaecology and obstetrics.  
41  
42  
43  
44  
45  
46

## 47 48 **Patient and Public involvement**

49 Patients were not involved in the design or analysis of this study.  
50  
51  
52  
53  
54  
55  
56  
57  
58  
59  
60

## Intervention

The intervention included an extension of the ED from 15 to 27 consultation rooms, and the opening of a fast-track for patients with small injuries or benign medical conditions. The fast-track is a healthcare pathway for the assessment and treatment of low severity patients, situated in a dedicated area of the emergency department. Two ED physicians managed adult patients and paediatric traumatology in the fast-track. When ED physicians were not available, they were replaced by residents. Gynaecology and psychiatry patients could also be managed in dedicated areas of the fast-track. Entry criteria for the fast-track were pre-defined in a protocol (Supplementary Appendix 1).

## Outcomes

The main outcome was an emergency department length of stay  $\geq 4$  hours [34,35]. LOS was defined as the time elapsed between registration in the ED to the time the patient is discharged from the ED. The secondary outcome was access block, defined by the Australasian College for Emergency Medicine as the situation where patients who need hospital care cannot access an appropriate hospital bed within a reasonable delay (8 hours) [36]. We used the Patient State (PS) classification [12] presented in Table 1 to identify patients that needed to be admitted to the hospital (PS 3, 4, 5, 6 and 7). Time to physician appraisal and LOS were extracted from local hospital databases (data extracted from Resurgences© in the intervention hospital and Urqual© in the control hospital). Quality of care indicators included were the number of patients leaving without being seen [37] and the monthly proportion of 30-day and 7-day readmissions.

**Table 1:** Patient State (PS) classification for patients admitted to the emergency department

| PS class | Description                                                      |
|----------|------------------------------------------------------------------|
| PS1      | Outpatient with moderate treatment                               |
| PS2      | Outpatient with major treatment                                  |
| PS3      | Inpatient with moderate treatment                                |
| PS4      | Inpatient with major treatment                                   |
| PS5      | Patients requiring immediate treatment, not classified elsewhere |
| PS6      | Patients requiring immediate intensive care/resuscitation        |
| PS7      | Died in emergency Department                                     |

### Statistical methods

Continuous variables were summarized with means and standard deviations. Categorical variables were presented with absolute frequencies and proportions. Multiple logistic regression models were estimated with Generalized Estimating Equations [38] to account for the within-patient correlation in LOS. The difference-in-difference estimate was modelled as the coefficient of the interaction between time (before or after the intervention) and location. The indicator variable for calculating the difference-in-difference estimate was coded 1 in the “post” period for the intervention hospital, and 0 otherwise. The model was  $\text{Logit}(p) = \alpha + \pi P + \gamma L + \delta D + T'\tau + X'\beta$ , with  $p$  being the probability of the outcome,  $\alpha$  the intercept,  $P$  an indicator variable for period,  $L$  an indicator variable for location,  $D$  the interaction between period and location (difference-in-differences indicator),  $T$  a vector of additional time variables (effect of being admitted during the night, the weekend or winter months) and  $X$  a vector of individual-level covariates. All clinically significant predictors of LOS were included in the model. Age was grouped in categories relevant to clinical practice. Primary diagnosis was defined using chapters of the International Classification of Disease (10<sup>th</sup> revision) to avoid problems in estimation due to



1  
2  
3 sparse data. Patient severity was included in the model using the PS classification [12]. If  
4  
5 one of the components of the PS classification was missing, PS was imputed to the most  
6  
7 likely category based on available data in the classification. Time variables included indicator  
8  
9 variables for admission during the night (22:00 – 06:00), and during weekends (Saturday and  
10  
11 Sunday). An indicator variable for December and January, where flu epidemics often occur,  
12  
13 was included in the model. The study sample was a convenience sample with a time window  
14  
15 constructed symmetrically around the intervention, allowing to control for seasonal effects.  
16  
17 Statistical analyses were performed using SAS software version 9.4 (The SAS Institute Inc.,  
18  
19 Cary, NC, USA). Data management and figures were realised using R version 3.3.4 [39].  
20  
21  
22  
23  
24  
25

### 26 **Ethics Statement**

27  
28 All legal requirements for epidemiological studies were respected, and the French national  
29  
30 commission governing the application of data privacy laws issued an approval for the  
31  
32 project. Since the study was strictly observational, in accordance with the laws that regulate  
33  
34 “non-interventional clinical research” in France, namely articles L.1121-1 and R.1121-2 of  
35  
36 the Public Health Code, it did not require a written informed consent from participants or  
37  
38 approval from an ethics committee.  
39  
40  
41  
42  
43

### 44 **Results**

45  
46  
47 Between 13 January 2015 and 13 January 2017, 111733 ED stays were registered in the  
48  
49 intervention hospital, and 85829 in the control hospital (Figure 1).  
50  
51  
52

### 53 **Figure 1** Flowchart

The Emergency department of the intervention hospital registered 53768 stays in 2016 and 57965 in 2017 (+7.8%). During the same period, the control hospital registered 42133 and 43696 admissions respectively (+3.7%). Additional physicians, nurses and assistant nurses allocated to the ED after the intervention are shown in Table 2.

**Table 2: Physicians, nurses and assistant nurses in the intervention hospital**

| Category            | 2015 | 2016 |
|---------------------|------|------|
| ED physicians FTE   | 11.5 | 14.5 |
| Nurse FTE           | 35.3 | 36.8 |
| Assistant nurse FTE | 16.8 | 19.5 |

FTE: Full-Time Equivalents

Mean age was higher in the control hospital (Table 3). The mean length of stay in the intervention hospital ED was 261 min (Standard Deviation 213) before the intervention and 248 min (SD 217) after the intervention. In the control group, the mean length of stay before the intervention was 262 min (SD 392) and 265 min (SD 393) after the intervention. In the intervention hospital, the proportion of patients with LOS < 4 hours changed from 55.2% to 60.6%. The proportion of patients with LOS < 4 hours was stable in the control group. Patients admitted to the hospital after the emergency department had a significantly longer ED LOS than outpatients (420 min vs 210 min). Within the subgroups of patients subsequently admitted to the intervention hospital, patients consulting for pneumonia had a decrease in mean time to physician assessment after the intervention: from 128 min (SD 122.5) to 123 min (SD 123.9). Stroke patients also had decreased waiting times: from 108 (SD 111) to 90 (SD 89) minutes. The time to physician assessment remained unchanged for patients consulting for myocardial infarction and heart failure: from 110 (SD 115) before the intervention to 109 (SD 114) minutes after the intervention.

**Table 3: Demographic characteristics of study population, readmissions, time to medical assessment and length of stay in the intervention and control hospitals**

|                                                                                | Intervention                       |                                    | P-value | Control                            |                                    | P-value |
|--------------------------------------------------------------------------------|------------------------------------|------------------------------------|---------|------------------------------------|------------------------------------|---------|
|                                                                                | 2015-2016<br>mean (SD) or<br>n (%) | 2016-2017<br>mean (SD) or<br>n (%) |         | 2015-2016<br>mean (SD) or<br>n (%) | 2016-2017<br>mean (SD) or<br>n (%) |         |
| <i>n</i>                                                                       | 53768                              | 57965                              | -       | 42133                              | 43696                              | -       |
| Age (years): mean (SD)                                                         | 40.4 (27.3)                        | 39.8 (27.4)                        | 0.0002  | 45.4 (25.3)                        | 45.4 (25.2)                        | 0.81    |
| Sex: female – <i>n</i> (%)                                                     | 26712 (49.7)                       | 29235 (50.4)                       | 0.001   | 20171 (47.9)                       | 21338 (48.8)                       | 0.005   |
| Length of stay (min):<br>mean (SD)                                             | 260.67<br>(212.65)                 | 248.36<br>(216.96)                 | <0.0001 | 262.78<br>(392.34)                 | 265.04<br>(392.48)                 | 0.40    |
| 7-day readmissions: <i>n</i><br>(%)                                            | 3177 (5.9)                         | 3642 (6.3)                         | 0.01    | 2600 (6.2)                         | 2689 (6.2)                         | 0.92    |
| 30-day readmissions: <i>n</i><br>(%)                                           | 6105 (11.4)                        | 7129 (12.3)                        | <0.0001 | 5048 (12.0)                        | 5489 (12.6)                        | 0.01    |
| Patients admitted to<br>hospital after<br>emergency department:<br><i>n</i>    | 14795                              | 14864                              | -       | 7530                               | 7592                               | -       |
| Length of stay (min):<br>mean (SD)                                             | 342 (221)                          | 367 (251)                          | <0.0001 | 536 (532)                          | 566 (554)                          | <0.001  |
| Injuries (ICD-10 codes<br>S00 to T98)<br><i>n</i>                              | 2470                               | 2341                               | -       | 1242                               | 1165                               | -       |
| Time to medical<br>assessment (min):<br>mean (SD)                              | 119.53 (111)                       | 99.35 (90)                         | <0.0001 | 34.79 (39)                         | 38.24 (46)                         | 0.05    |
| Patients not admitted to<br>hospital after<br>emergency department<br><i>n</i> | 38971                              | 43100                              | -       | 34603                              | 36104                              | -       |
| Length of stay (min):<br>mean (SD)                                             | 230 (201)                          | 208 (188)                          | <0.0001 | 203 (325)                          | 201 (314)                          | 0.51    |
| Injuries (ICD-10 codes<br>S00 to T98)<br><i>n</i>                              | 11992                              | 13170                              | -       | 14902                              | 15467                              | -       |
| Time to medical<br>assessment (min):<br>mean (SD)                              | 130.27 (97.6)                      | 100.23 (78.0)                      | <0.0001 | 39.93 (37.35)                      | 44.43 (45.30)                      | <0.0001 |

ICD-10: International Classification of Disease, 10<sup>th</sup> revision

1  
2  
3 The exponentiated difference-in-differences estimate was 0.798 (95% CI 0.762 - 0.836,  
4  
5  $p < 0.0001$ ), therefore the intervention successfully reduced the number of ED stays with LOS  
6  
7  $\geq 4$  hours (Table 4). This coefficient can be interpreted as a ratio of odds ratios. However,  
8  
9 the estimate for access block was 1.121 (95% CI 1.029 - 1.222,  $p = 0.009$ ): the intervention  
10  
11 was not effective in helping patients access an appropriate hospital bed in a reasonable  
12  
13 amount of time ( $< 8$ h). Age was linearly related with length of stay, with younger patients  
14  
15 having a shorter LOS. Weekends were associated with a shorter length of stay. Trends in  
16  
17 daily mean length of stay are shown in Figure 2.  
18  
19  
20  
21  
22

23 **Figure 2** Daily mean emergency department length of stay during the study period (trends  
24  
25 obtained by locally weighted regression).  
26  
27  
28  
29

### 30 **Effect on quality of care indicators**

31  
32 Overall, 12.0% of stays were 30-day readmissions. Most readmissions (6.1%) occurred  
33  
34 within the first seven days. There was a trend for increasing 30-day readmissions during the  
35  
36 study period (Figure 3). Seven-day readmissions increased in the intervention group, but not  
37  
38 in the control group. In the intervention hospital, after the intervention, the proportion of  
39  
40 patients leaving without being seen by a physician decreased from 10% to 5.4%.  
41  
42  
43  
44  
45

46 **Figure 3** Proportion of emergency department 7-day and 30-day readmissions during the  
47  
48 study period  
49  
50  
51  
52  
53  
54  
55  
56  
57  
58  
59  
60

**Table 4:** Multivariable logistic regression fitted with Generalized Estimating Equations for length of stay > 4h and access block

| Variable                                                                                       | Odds Ratio<br>(emergency<br>department<br>length of stay<br>≥4 hours) <sup>a</sup> | (95%<br>Confidence<br>Interval) | P-value | Odds Ratio<br>(Access<br>block:<br>emergency<br>department<br>length of stay<br>≥8h for<br>hospitalized<br>patients) <sup>a</sup> | (95%<br>Confidence<br>Interval) | P-value |
|------------------------------------------------------------------------------------------------|------------------------------------------------------------------------------------|---------------------------------|---------|-----------------------------------------------------------------------------------------------------------------------------------|---------------------------------|---------|
| <b>Location × Period<br/>interaction</b>                                                       | 0.798                                                                              | (0.762 - 0.836)                 | <0.0001 | 1.121                                                                                                                             | (1.029 - 1.222)                 | <0.01   |
| <b>7-day readmission</b>                                                                       | 0.906                                                                              | (0.861 - 0.953)                 | <0.001  | 0.894                                                                                                                             | (0.82 - 0.975)                  | 0.01    |
| <b>Weekend day</b>                                                                             | 0.896                                                                              | (0.873 - 0.919)                 | <0.0001 | 0.849                                                                                                                             | (0.808 - 0.892)                 | <0.0001 |
| <b>Night</b>                                                                                   | 0.749                                                                              | (0.724 - 0.775)                 | <0.0001 | 1.51                                                                                                                              | (1.422 - 1.604)                 | <0.0001 |
| <b>Principal Diagnosis<br/>(ICD-10 Chapter)</b>                                                |                                                                                    |                                 |         |                                                                                                                                   |                                 |         |
| <b>Injury, poisoning</b>                                                                       | 0.400                                                                              | (0.375 - 0.427)                 | <0.0001 | 0.578                                                                                                                             | (0.529 - 0.632)                 | <0.0001 |
| <b>Diseases of the nervous<br/>  system</b>                                                    | 1.903                                                                              | (1.713 - 2.114)                 | <0.0001 | 1.266                                                                                                                             | (1.119 - 1.444)                 | <0.001  |
| <b>Skin and subcutaneous<br/>  tissue</b>                                                      | 0.418                                                                              | (0.377 - 0.463)                 | <0.0001 | 0.606                                                                                                                             | (0.483 - 0.761)                 | <0.0001 |
| <b>Neoplasms</b>                                                                               | 1.715                                                                              | (1.253 - 2.348)                 | 0.001   | 2.588                                                                                                                             | (1.941 - 3.45)                  | <0.0001 |
| <b>Diseases of the<br/>  circulatory system</b>                                                | 1 (Reference)                                                                      | -                               | -       | 1 (Reference)                                                                                                                     | -                               | -       |
| <b>Month: December and<br/>January (reference = other<br/>months)</b>                          | 1.121                                                                              | (1.088 - 1.155)                 | <0.0001 | 1.324                                                                                                                             | (1.255 - 1.396)                 | <0.0001 |
| <b>Severity (PS classification)</b>                                                            |                                                                                    |                                 |         |                                                                                                                                   |                                 |         |
| <b>PS1: Outpatient with<br/>  moderate treatment</b>                                           | 1 (Reference)                                                                      | -                               | -       | -                                                                                                                                 | -                               | -       |
| <b>PS2: Outpatient with<br/>  major treatment</b>                                              | 0.753                                                                              | (0.725 - 0.781)                 | <0.0001 | -                                                                                                                                 | -                               | -       |
| <b>PS3: Inpatient with<br/>  moderate treatment</b>                                            | 2.584                                                                              | (2.5 - 2.671)                   | <0.0001 | 1 (Reference)                                                                                                                     | -                               | -       |
| <b>PS4: Inpatient with<br/>  major treatment</b>                                               | 3.083                                                                              | (2.941 - 3.231)                 | <0.0001 | 0.875                                                                                                                             | (0.832 - 0.92)                  | <0.0001 |
| <b>PS5: Patients requiring<br/>  immediate treatment,<br/>  not<br/>  classified elsewhere</b> | 1.225                                                                              | (1.064 - 1.411)                 | <0.01   | 0.783                                                                                                                             | (0.686 - 0.894)                 | <0.001  |
| <b>PS6: Patients requiring<br/>  immediate<br/>  intensive<br/>  care/resuscitation</b>        | 0.38                                                                               | (0.307 - 0.47)                  | <0.0001 | 0.305                                                                                                                             | (0.23 - 0.403)                  | <0.0001 |
| <b>PS7: Died in emergency<br/>  Department</b>                                                 | 0.436                                                                              | (0.279 - 0.682)                 | <0.001  | 0.416                                                                                                                             | (0.251 - 0.691)                 | <0.001  |
| <b>Sex: Female (reference =<br/>male)</b>                                                      | 0.972                                                                              | (0.949 - 0.996)                 | 0.02    | 1.032                                                                                                                             | (0.988 - 1.078)                 | 0.16    |
| <b>Age (years)</b>                                                                             |                                                                                    |                                 |         |                                                                                                                                   |                                 |         |
| <b>50 - 64</b>                                                                                 | 1.693                                                                              | (1.635 - 1.753)                 | <0.0001 | 1.340                                                                                                                             | (1.248 - 1.438)                 | <0.0001 |

|         |               |                 |         |                  |                 |         |
|---------|---------------|-----------------|---------|------------------|-----------------|---------|
| 65 - 74 | 2.279         | (2.182 - 2.38)  | <0.0001 | 1.544            | (1.431 - 1.665) | <0.0001 |
| 75 - 89 | 3.395         | (3.268 - 3.527) | <0.0001 | 1.786            | (1.677 - 1.903) | <0.0001 |
| ≥ 90    | 4.250         | (3.979 - 4.539) | <0.0001 | 1.748            | (1.606 - 1.903) | <0.0001 |
| 0 - 17  | 0.259         | (0.248 - 0.270) | <0.0001 | 0.078            | (0.064 - 0.096) | <0.0001 |
| 18 - 50 | 1 (Reference) | -               | -       | 1<br>(Reference) | -               | -       |

<sup>a</sup> Multivariable analysis adjusted for age, sex, time of the day (nighttime or daytime), time in the week (weekend day or weekday), time of the year (December and January or other months, admission diagnosis (grouped using ICD-10 chapters) and severity (using the PS classification).

## Discussion

Our study showed that implementing a fast-track can decrease the mean length of stay and number of stays lasting  $\geq 4$  hours in the emergency department of a large general hospital.

We did not observe a higher number of stays with LOS inferior to 8 hours for patients requiring hospitalization, suggesting that the length of stay for severe patients is limited by hospital-level bed availability rather than ED-related factors.

Our results are concurrent with Bucheli and Martina [40], who found that adding a supplementary ED physician shortened outpatient ED length of stay but not the LOS for patients that would be hospitalized afterwards. The extension of the emergency department could explain part of our result. However, the extension of an emergency department does not guarantee improved access to care. In a study by Han et al., the time between ambulance diversion episodes was not significantly different after extending an ED from 28 to 53 beds [41]. The difference-in-differences method is based on a hypothesis that intervention and control hospitals share common trends before the study period. In our study, the trends in both hospitals were graphically similar. Regional data also supports the hypothesis that intervention hospital and the control hospital are subject to common shocks [42]. Asplin et al. consider the emergency department as a system with 3 components :

1  
2  
3 *input, throughput, output* [43]. The input component includes events, diseases or other  
4 characteristics that contribute to the demand for urgent care. Throughput includes triage,  
5 room placement, diagnosis and treatment. The implementation of the fast-track can  
6 accelerate throughput for outpatients. Regarding admission diagnoses, in the multivariable  
7 analysis patients admitted for injuries (ICD-10 codes S00 to T98) and skin problems (L00 to  
8 L99) tended to have short lengths of stay, while patients admitted for neoplasms (C00 to  
9 D48) or neurologic diseases (G00 – G99) tended to have longer lengths of stay. This could be  
10 due to the necessity of consulting different specialists [44] or to delays in obtaining  
11 complementary examinations. As expected, patients that were subsequently admitted to  
12 the hospital (PS3 and PS4) had a higher LOS than outpatients. The limiting factor for ED LOS  
13 is often lack of available hospital beds. Some authors have suggested that an occupancy of  
14 85% is a suitable target to ensure that new patients are not left without beds [45]. This  
15 seems difficult to implement under current conditions. A systematic review of 220 articles  
16 discussing strategies to prevent « access block » [36] mentions interventions to diminish the  
17 number of patients admitted to the ED, observation wards [46], and other resource  
18 management strategies. The DEED II study was a randomised controlled trial measuring the  
19 effect of a multidisciplinary geriatric management plan for patients admitted to the  
20 emergency department that returned home afterwards. The patients of the intervention  
21 group had significantly lower ED readmission rates than the other patients. There were,  
22 however, no differences in mortality or in admissions to nursing homes [47]. This type of  
23 intervention could be relevant for the hospitals in our study, where age was a major  
24 predictor of length of stay. Other solutions to prevent ED crowding are sharing optimal care  
25 processes [48], enrolling additional staff [10], or eventually redirecting patients towards  
26 other centers [9]. Causes of increased demand for urgent care include the ageing of  
27  
28  
29  
30  
31  
32  
33  
34  
35  
36  
37  
38  
39  
40  
41  
42  
43  
44  
45  
46  
47  
48  
49  
50  
51  
52  
53  
54  
55  
56  
57  
58  
59  
60

1  
2  
3 populations, with a higher prevalence of chronic diseases, the scarcity of primary care, and  
4  
5 changing perceptions of what is considered urgent. Solitude is a major driver of ED  
6  
7 consultations [49]. The efficacy of gatekeeping procedures has yet to be evaluated [50]. The  
8  
9 patients that frequently consult in the emergency department, however, are often  
10  
11 disadvantaged by a low socio-economic status [51] and can be considered a high-risk group  
12  
13 regarding morbidity and mortality [52]. Prior contact with the ED could help improve  
14  
15 communication with the patient, although an effect on the number of ED admissions  
16  
17 remains to be established [53]. Pain is a major complaint in the ED, and patients with  
18  
19 chronic pain could be more likely to consult [54]. Our data shows longer ED lengths of stay  
20  
21 for patients admitted for neoplasms and diseases of the nervous system. Complex case  
22  
23 managers targeting these subgroups could be a solution to shorten LOS [55]. Access to  
24  
25 programmed care is crucial. Patients who cannot access programmed care will come back to  
26  
27 the emergency department. In an Australian study, around half of patients would prefer to  
28  
29 see a general practitioner for a similar problem than to be treated in the emergency fast-  
30  
31 track [56]. In this regard, what is happening in emergency departments can be seen as a  
32  
33 mirror of the dysfunctions in a healthcare system [57]. After the implementation of the fast-  
34  
35 track, the number of patients registered in the ED increased by 7.8%. This increase was  
36  
37 higher than in the control group. This is unlikely to be a fluctuation in epidemiological  
38  
39 trends, but rather reflects an increased demand generated by an easier access to timely  
40  
41 care.  
42  
43  
44  
45  
46  
47

48 Patients leaving without being seen diminished from 10% to 5.4%, similar to the proportions  
49  
50 in studies by Combs et al [58] and Sanchez et al. [30]. In this study we evaluated 7 and 30-  
51  
52 day readmissions [59]. The main rationale for including these indicators was to appreciate  
53  
54 the extent by which the decrease in LOS was explained by readmissions of the same  
55  
56  
57  
58  
59  
60



1  
2  
3 patients. Patients coming back to the hospital within 7 days had shorter lengths of stay  
4  
5 during the readmission: Odds Ratio for LOS  $\geq$  4 hours: 0.91; 95% Confidence Interval (CI)  
6  
7 (0.86 - 0.95). One possible explanation is the availability of the patient's recent medical  
8  
9 history, making medical assessment simpler. Seven-day readmissions increased in the  
10  
11 intervention hospital after the implementation of the fast-track. However, because we  
12  
13 included a readmission indicator in the multivariable model, the fast-track effect on length  
14  
15 of stay is probably not due to close readmissions of the same patients. Emergency  
16  
17 departments may have a role to play in preventing hospital readmissions [60]. However,  
18  
19 recent studies show that hospital readmissions are often not avoidable, and are largely  
20  
21 influenced by factors on which hospitals have no control, like socio-economic status [61].  
22  
23 Preventable readmissions algorithms (which could improve our appreciation of which  
24  
25 readmissions are caused by hospital-related factors) [62] are being developed, however  
26  
27 they are not widely available at the moment. We were able to control for regional trends  
28  
29 with the inclusion of a control hospital. The intervention that took place in the intervention  
30  
31 group was the only major change in the emergency department during this period. The  
32  
33 control hospital did not undergo structural changes during the study period. The major  
34  
35 limitation of our study is that the effect of implementing a fast-track was confounded with  
36  
37 the extension and addition of staff to the ED to allow it to function effectively under  
38  
39 increased constraints. However, the reported increase in full-time equivalents was due to  
40  
41 the administrative transfer of staff from the mobile unit for emergencies and intensive care.  
42  
43 Only one additional nurse was fully allocated to the ED. As the mobile unit's main activity is  
44  
45 to intervene outside of the hospital, it is unlikely that the changes in length of stay observed  
46  
47 in the intervention hospital are entirely explained by the increase in human resources.  
48  
49 Moreover, because supplemental beds were added to the ED as part of the intervention,  
50  
51  
52  
53  
54  
55  
56  
57  
58  
59  
60

1  
2  
3 the ratio of staff to beds decreased. Another possible shortcoming of this study is that the  
4  
5 time to physician assessment was evaluated using data from local emergency department  
6  
7 information systems. There could be discrepancies between hospitals in encoding the  
8  
9 moment where the physician sees the patient. However, this is unlikely to change the  
10  
11 difference in trends between hospitals. To conclude, our study showed an increase in short  
12  
13 stays for low acuity patients following the implementation of the fast-track. In this regard,  
14  
15 the fast-track consolidated the emergency department's role of compensating deficiencies  
16  
17 in access to primary care, without favourably impacting length of stay for severe patients.  
18  
19 Hospital-level bed availability is critical to ensure efficient healthcare for patients registered  
20  
21 to the ED. Studies including more control hospitals and a larger array of quality of care  
22  
23 indicators are warranted to estimate the effect of implementing a fast-track on emergency  
24  
25 department performance and population health outcomes.  
26  
27  
28  
29  
30  
31  
32

33 **Funding statement:** This research received no specific grant from any funding agency in the  
34  
35 public, commercial or not-for-profit sectors.  
36

37 **Competing interests statement:** All authors have no competing interests to declare.  
38

39 **Author contributions:** JC, DL and SS designed the study. SS, DL, XF, AC contributed to the  
40  
41 acquisition of data. JC conducted the statistical analysis. JC, XF, AD, AC, DL and SS  
42  
43 contributed to drafting the article or revising it critically for important intellectual content.  
44  
45

46 All authors read and approved the final manuscript.  
47

48 **Acknowledgements:** We would like to thank Mohamed Afilal and Priscilla De Souza for their  
49  
50 contributions in data extraction.  
51  
52

53 **Data sharing statement:** To prevent dissemination of sensitive patient data, the dataset on  
54  
55 which this study was based was not made available to the public.  
56  
57  
58  
59  
60

**STROBE Checklist:** STROBE Checklist is provided as a Supplementary Material

## References

- 1 Cour des comptes. Les urgences médicales : constats et évolution récente. In: *Rapport public annuel 2007*. Paris: : Cour des comptes 2007. 1.
- 2 Pines JM, Hilton JA, Weber EJ, *et al*. International perspectives on emergency department crowding. *Acad Emerg Med Off J Soc Acad Emerg Med* 2011;**18**:1358–70. doi:10.1111/j.1553-2712.2011.01235.x
- 3 Moskop JC, Sklar DP, Geiderman JM, *et al*. Emergency Department Crowding, Part 1—Concept, Causes, and Moral Consequences. *Ann Emerg Med* 2009;**53**:605–11. doi:10.1016/j.annemergmed.2008.09.019
- 4 Chiu I-M, Lin Y-R, Syue Y-J, *et al*. The influence of crowding on clinical practice in the emergency department. *Am J Emerg Med* Published Online First: 4 July 2017. doi:10.1016/j.ajem.2017.07.011
- 5 Hwang U, Richardson LD, Sonuyi TO, *et al*. The effect of emergency department crowding on the management of pain in older adults with hip fracture. *J Am Geriatr Soc* 2006;**54**:270–5. doi:10.1111/j.1532-5415.2005.00587.x
- 6 Sprivulis PC, Da Silva J-A, Jacobs IG, *et al*. The association between hospital overcrowding and mortality among patients admitted via Western Australian emergency departments. *Med J Aust* 2006;**184**:208–12.
- 7 Trzeciak S, Rivers EP. Emergency department overcrowding in the United States: an emerging threat to patient safety and public health. *Emerg Med J EMJ* 2003;**20**:402–5.
- 8 Schull MJ, Szalai JP, Schwartz B, *et al*. Emergency department overcrowding following systematic hospital restructuring: trends at twenty hospitals over ten years. *Acad Emerg Med Off J Soc Acad Emerg Med* 2001;**8**:1037–43.
- 9 Hoot NR, Aronsky D. Systematic review of emergency department crowding: causes, effects, and solutions. *Ann Emerg Med* 2008;**52**:126–36. doi:10.1016/j.annemergmed.2008.03.014
- 10 Hoot NR, Zhou C, Jones I, *et al*. Measuring and forecasting emergency department crowding in real time. *Ann Emerg Med* 2007;**49**:747–55. doi:10.1016/j.annemergmed.2007.01.017
- 11 Hoot N, Aronsky D. An Early Warning System for Overcrowding in the Emergency Department. *AMIA Annu Symp Proc* 2006;**2006**:339–43.

- 12 Afilal M, Yalaoui F, Dugardin F, *et al.* Forecasting the Emergency Department Patients Flow. *J Med Syst* 2016;**40**:175. doi:10.1007/s10916-016-0527-0
- 13 Carr BG, Kaye AJ, Wiebe DJ, *et al.* Emergency department length of stay: a major risk factor for pneumonia in intubated blunt trauma patients. *J Trauma* 2007;**63**:9–12. doi:10.1097/TA.0b013e31805d8f6b
- 14 Diercks DB, Roe MT, Chen AY, *et al.* Prolonged emergency department stays of non-ST-segment-elevation myocardial infarction patients are associated with worse adherence to the American College of Cardiology/American Heart Association guidelines for management and increased adverse events. *Ann Emerg Med* 2007;**50**:489–96. doi:10.1016/j.annemergmed.2007.03.033
- 15 Chalfin DB, Trzeciak S, Likourezos A, *et al.* Impact of delayed transfer of critically ill patients from the emergency department to the intensive care unit. *Crit Care Med* 2007;**35**:1477–83. doi:10.1097/01.CCM.0000266585.74905.5A
- 16 Bernstein SL, Aronsky D, Duseja R, *et al.* The effect of emergency department crowding on clinically oriented outcomes. *Acad Emerg Med Off J Soc Acad Emerg Med* 2009;**16**:1–10. doi:10.1111/j.1553-2712.2008.00295.x
- 17 Guttman A, Schull MJ, Vermeulen MJ, *et al.* Association between waiting times and short term mortality and hospital admission after departure from emergency department: population based cohort study from Ontario, Canada. *BMJ* 2011;**342**:d2983. doi:10.1136/bmj.d2983
- 18 Bayley MD, Schwartz JS, Shofer FS, *et al.* The financial burden of emergency department congestion and hospital crowding for chest pain patients awaiting admission. *Ann Emerg Med* 2005;**45**:110–7. doi:10.1016/j.annemergmed.2004.09.010
- 19 Thomas JW, Guire KE, Horvat GG. Is patient length of stay related to quality of care? *Hosp Health Serv Adm* 1997;**42**:489–507.
- 20 Vermeulen MJ, Guttman A, Stukel TA, *et al.* Are reductions in emergency department length of stay associated with improvements in quality of care? A difference-in-differences analysis. *BMJ Qual Saf* 2015;:bmjqs-2015-004189. doi:10.1136/bmjqs-2015-004189
- 21 Jarvis PRE. Improving emergency department patient flow. *Clin Exp Emerg Med* 2016;**3**:63–8. doi:10.15441/ceem.16.127
- 22 Le Spégnane D, Cauterman M. *Rapport de fin de mission « Temps d'attente et de passage aux Urgences ». Juillet 2003 – mars 2005.* Paris: : Mission Nationale d'Expertise et d'Audit Hospitaliers 2005.
- 23 McD Taylor D, Bennett DM, Cameron PA. A paradigm shift in the nature of care provision in emergency departments. *Emerg Med J EMJ* 2004;**21**:681–4. doi:10.1136/emj.2004.017640

- 1  
2  
3 24 Kilic YA, Agalar FA, Kunt M, *et al.* Prospective, double-blind, comparative fast-tracking  
4 trial in an academic emergency department during a period of limited resources. *Eur J*  
5 *Emerg Med Off J Eur Soc Emerg Med* 1998;**5**:403–6.  
6
- 7 25 Fitzgerald K, Pelletier L, Reznek MA. A Queue-Based Monte Carlo Analysis to Support  
8 Decision Making for Implementation of an Emergency Department Fast Track. *J Healthc*  
9 *Eng* 2017;**2017**:1–8. doi:10.1155/2017/6536523  
10
- 11 26 Cooke M, Wilson S, Pearson S. The effect of a separate stream for minor injuries on  
12 accident and emergency department waiting times. *Emerg Med J EMJ* 2002;**19**:28–30.  
13 doi:10.1136/emj.19.1.28  
14
- 15 27 Rogers T, Ross N, Spooner D. Evaluation of a ‘see and treat’ pilot study introduced to an  
16 emergency department. *Accid Emerg Nurs* 2004;**12**:24–7.  
17 doi:10.1016/j.aaen.2003.08.005  
18
- 19 28 Ardagh MW, Wells JE, Cooper K, *et al.* Effect of a rapid assessment clinic on the waiting  
20 time to be seen by a doctor and the time spent in the department, for patients  
21 presenting to an urban emergency department: a controlled prospective trial. *N Z Med J*  
22 2002;**115**:U28.  
23
- 24 29 Kwa P, Blake D. Fast track: has it changed patient care in the emergency department?  
25 *Emerg Med Australas EMA* 2008;**20**:10–5. doi:10.1111/j.1742-6723.2007.01021.x  
26
- 27 30 Sanchez M, Smally AJ, Grant RJ, *et al.* Effects of a fast-track area on emergency  
28 department performance. *J Emerg Med* 2006;**31**:117–20.  
29 doi:10.1016/j.jemermed.2005.08.019  
30
- 31 31 Dimick JB, Ryan AM. Methods for evaluating changes in health care policy: the  
32 difference-in-differences approach. *JAMA* 2014;**312**:2401–2.  
33 doi:10.1001/jama.2014.16153  
34
- 35 32 Tung Y-C, Chang H-Y, Chang G-M. Impact of bundled payments on hip fracture  
36 outcomes: a nationwide population-based study. *Int J Qual Health Care J Int Soc Qual*  
37 *Health Care* 2018;**30**:23–31. doi:10.1093/intqhc/mzx158  
38
- 39 33 Rajaram R, Chung JW, Jones AT, *et al.* Association of the 2011 ACGME Resident Duty  
40 Hour Reform With General Surgery Patient Outcomes and With Resident Examination  
41 Performance. *JAMA* 2014;**312**:2374–84. doi:10.1001/jama.2014.15277  
42
- 43 34 Gill SD, Lane SE, Sheridan M, *et al.* Why do “fast track” patients stay more than four  
44 hours in the emergency department? An investigation of factors that predict length of  
45 stay. *Emerg Med Australas EMA* Published Online First: 23 March 2018.  
46 doi:10.1111/1742-6723.12964  
47
- 48 35 Khanna S, Boyle J, Good N, *et al.* New emergency department quality measure: from  
49 access block to National Emergency Access Target compliance. *Emerg Med Australas*  
50 *EMA* 2013;**25**:565–72. doi:10.1111/1742-6723.12139  
51  
52  
53  
54  
55  
56  
57  
58  
59  
60

- 1  
2  
3 36 Forero R, McCarthy S, Hillman K. Access block and emergency department  
4 overcrowding. *Crit Care* 2011;**15**:216. doi:10.1186/cc9998  
5
- 6 37 Broccoli MC, Moresky R, Dixon J, *et al.* Defining quality indicators for emergency care  
7 delivery: findings of an expert consensus process by emergency care practitioners in  
8 Africa. *BMJ Glob Health* 2018;**3**:e000479. doi:10.1136/bmjgh-2017-000479  
9
- 10 38 Zeger SL, Liang K-Y. Longitudinal Data Analysis for Discrete and Continuous Outcomes.  
11 *Biometrics* 1986;**42**:121–30. doi:10.2307/2531248  
12
- 13 39 R Core Team (2016). R: A language and environment for statistical computing. R  
14 Foundation for Statistical Computing, Vienna, Austria. URL <https://www.R-project.org/>.  
15
- 16 40 Bucheli B, Martina B. Reduced length of stay in medical emergency department  
17 patients: a prospective controlled study on emergency physician staffing. *Eur J Emerg*  
18 *Med Off J Eur Soc Emerg Med* 2004;**11**:29–34.  
19
- 20 41 Han JH, Zhou C, France DJ, *et al.* The effect of emergency department expansion on  
21 emergency department overcrowding. *Acad Emerg Med Off J Soc Acad Emerg Med*  
22 2007;**14**:338–43. doi:10.1197/j.aem.2006.12.005  
23
- 24 42 E Lagille, Mounechetrou-Njoya I, Noizet M. Panorama des urgences 2013.  
25 2013.[http://www.oru-ca.com/wp-content/uploads/2014/12/Panorama-Urgences-2013-](http://www.oru-ca.com/wp-content/uploads/2014/12/Panorama-Urgences-2013-ORU-CA-VF-ALL-12-12-14.pdf)  
26 [ORU-CA-VF-ALL-12-12-14.pdf](http://www.oru-ca.com/wp-content/uploads/2014/12/Panorama-Urgences-2013-ORU-CA-VF-ALL-12-12-14.pdf) (accessed 19 Jul 2018).  
27
- 28 43 Asplin BR, Magid DJ, Rhodes KV, *et al.* A conceptual model of emergency department  
29 crowding. *Ann Emerg Med* 2003;**42**:173–80. doi:10.1067/mem.2003.302  
30
- 31 44 Vegting IL, Nanayakkara PWB, van Dongen AE, *et al.* Analysing completion times in an  
32 academic emergency department: coordination of care is the weakest link. *Neth J Med*  
33 2011;**69**:392–8.  
34
- 35 45 Cameron PA, Joseph AP, McCarthy SM. Access block can be managed. *Med J Aust*  
36 2009;**190**:364–8.  
37
- 38 46 Kelen GD, Scheulen JJ, Hill PM. Effect of an emergency department (ED) managed acute  
39 care unit on ED overcrowding and emergency medical services diversion. *Acad Emerg*  
40 *Med Off J Soc Acad Emerg Med* 2001;**8**:1095–100.  
41
- 42 47 Caplan GA, Williams AJ, Daly B, *et al.* A randomized, controlled trial of comprehensive  
43 geriatric assessment and multidisciplinary intervention after discharge of elderly from  
44 the emergency department--the DEED II study. *J Am Geriatr Soc* 2004;**52**:1417–23.  
45 doi:10.1111/j.1532-5415.2004.52401.x  
46
- 47 48 Hoffenberg S, Hill MB, Houry D. Does sharing process differences reduce patient length  
48 of stay in the emergency department? *Ann Emerg Med* 2001;**38**:533–40.  
49 doi:10.1067/mem.2001.119426  
50
- 51  
52  
53  
54  
55  
56  
57  
58  
59  
60



- 1  
2  
3 49 Geller J, Janson P, McGovern E, *et al.* Loneliness as a predictor of hospital emergency  
4 department use. *J Fam Pract* 1999;**48**:801–4.  
5  
6 50 van Uden CJT, Winkens R, Wesseling G, *et al.* Use of out of hours services: a comparison  
7 between two organisations. *Emerg Med J EMJ* 2003;**20**:184–7.  
8 doi:10.1136/emj.20.2.184  
9  
10 51 Lombrail P, Vitoux-Brot C, Bourrillon A, *et al.* Another look at emergency room  
11 overcrowding: accessibility of the health services and quality of care. *Int J Qual Health*  
12 *Care J Int Soc Qual Health Care* 1997;**9**:225–35.  
13  
14 52 Hansagi H, Edhag O, Allebeck P. High consumers of health care in emergency units: how  
15 to improve their quality of care. *Qual Assur Health Care Off J Int Soc Qual Assur Health*  
16 *Care* 1991;**3**:51–62.  
17  
18 53 Graber DJ, Ardagh MW, O'Donovan P, *et al.* A telephone advice line does not decrease  
19 the number of presentations to Christchurch Emergency Department, but does decrease  
20 the number of phone callers seeking advice. *N Z Med J* 2003;**116**:U495.  
21  
22 54 Cordell WH, Keene KK, Giles BK, *et al.* The high prevalence of pain in emergency medical  
23 care. *Am J Emerg Med* 2002;**20**:165–9.  
24  
25 55 Sandberg M, Jakobsson U, Midlöv P, *et al.* Case management for frail older people - a  
26 qualitative study of receivers' and providers' experiences of a complex intervention.  
27 *BMC Health Serv Res* 2014;**14**:14. doi:10.1186/1472-6963-14-14  
28  
29 56 Lutze M, Ross M, Chu M, *et al.* Patient perceptions of emergency department fast track:  
30 a prospective pilot study comparing two models of care. *Australas Emerg Nurs J AENJ*  
31 2014;**17**:112–8. doi:10.1016/j.aenj.2014.05.001  
32  
33 57 Cohen L, Génisson C, Savary R-P. *Les urgences hospitalières: miroir des*  
34 *dysfonctionnements du système de santé*. Paris: : Comission des Affaires Sociales sur les  
35 Urgences Hospitalières 2017.  
36  
37 58 Combs S, Chapman R, Bushby A. Evaluation of Fast Track. *Accid Emerg Nurs* 2007;**15**:40–  
38 7. doi:10.1016/j.aaen.2006.07.006  
39  
40 59 Gupta A, Allen LA, Bhatt DL, *et al.* Association of the Hospital Readmissions Reduction  
41 Program Implementation With Readmission and Mortality Outcomes in Heart Failure.  
42 *JAMA Cardiol* 2018;**3**:44–53. doi:10.1001/jamacardio.2017.4265  
43  
44 60 Singh S, Lin Y-L, Nattinger AB, *et al.* Variation in Readmission Rates by Emergency  
45 Departments and Emergency Department Providers Caring for Patients After Discharge.  
46 *J Hosp Med* 2015;**10**:705–10. doi:10.1002/jhm.2407  
47  
48 61 McIlvennan CK, Eapen ZJ, Allen LA. Hospital readmissions reduction program. *Circulation*  
49 2015;**131**:1796–803. doi:10.1161/CIRCULATIONAHA.114.010270  
50  
51  
52  
53  
54  
55  
56  
57  
58  
59  
60

1  
2  
3 62 Blunt I, Bardsley M, Grove A, *et al.* Classifying emergency 30-day readmissions in  
4 England using routine hospital data 2004–2010: what is the scope for reduction? *Emerg*  
5 *Med J* 2014;;emermed-2013-202531. doi:10.1136/emmermed-2013-202531  
6  
7  
8  
9  
10  
11  
12  
13  
14  
15  
16  
17  
18  
19  
20  
21  
22  
23  
24  
25  
26  
27  
28  
29  
30  
31  
32  
33  
34  
35  
36  
37  
38  
39  
40  
41  
42  
43  
44  
45  
46  
47  
48  
49  
50  
51  
52  
53  
54  
55  
56  
57  
58  
59  
60

For peer review only



1  
2  
3  
4  
5  
6  
7  
8  
9  
10  
11  
12  
13  
14  
15  
16  
17  
18  
19  
20  
21  
22  
23  
24  
25  
26  
27  
28  
29  
30  
31  
32  
33  
34  
35  
36  
37  
38  
39  
40  
41  
42  
43  
44  
45  
46  
47  
48  
49  
50  
51  
52  
53  
54  
55  
56  
57  
58  
59  
60

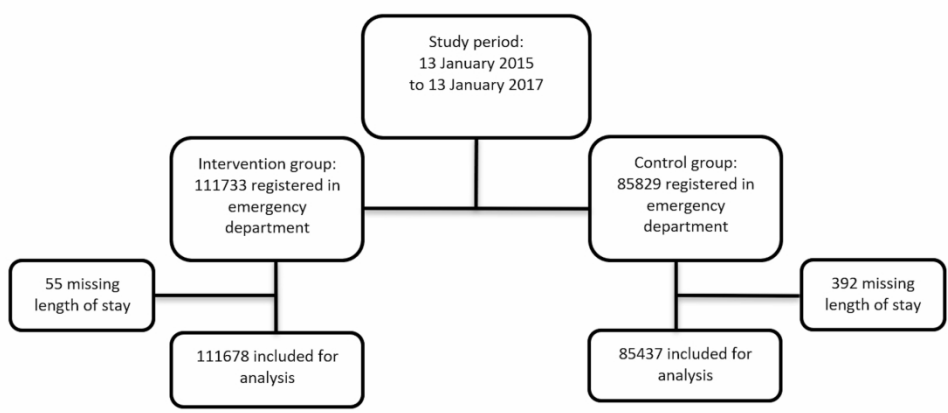

Flowchart of the study

209x148mm (300 x 300 DPI)

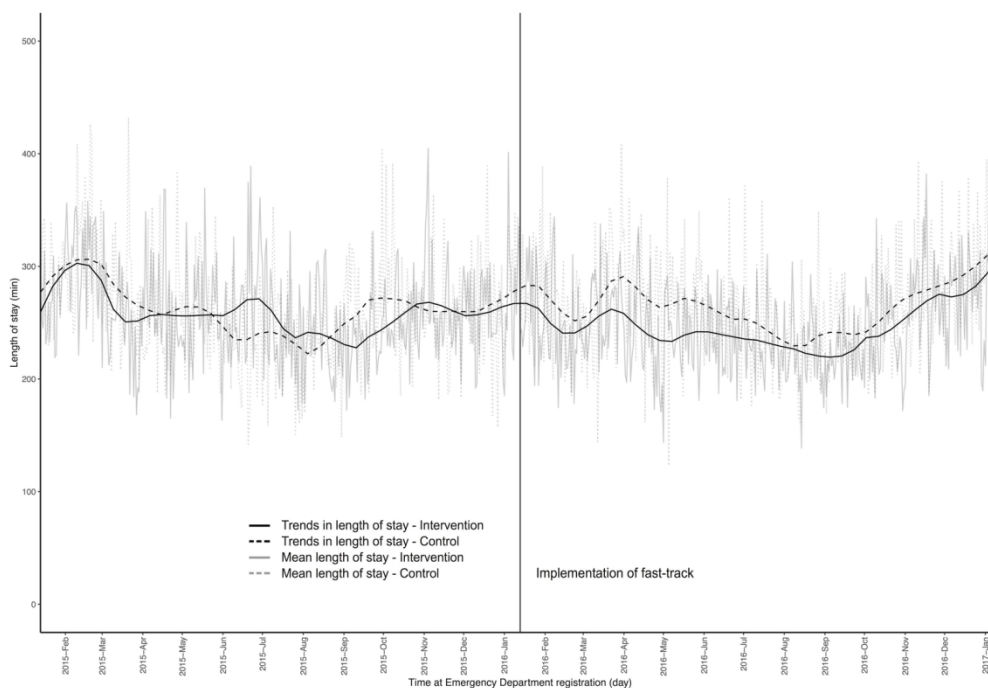

Daily mean emergency department length of stay during the study period, with trends obtained by locally weighted regression.

142x99mm (300 x 300 DPI)

1  
2  
3  
4  
5  
6  
7  
8  
9  
10  
11  
12  
13  
14  
15  
16  
17  
18  
19  
20  
21  
22  
23  
24  
25  
26  
27  
28  
29  
30  
31  
32  
33  
34  
35  
36  
37  
38  
39  
40  
41  
42  
43  
44  
45  
46  
47  
48  
49  
50  
51  
52  
53  
54  
55  
56  
57  
58  
59  
60

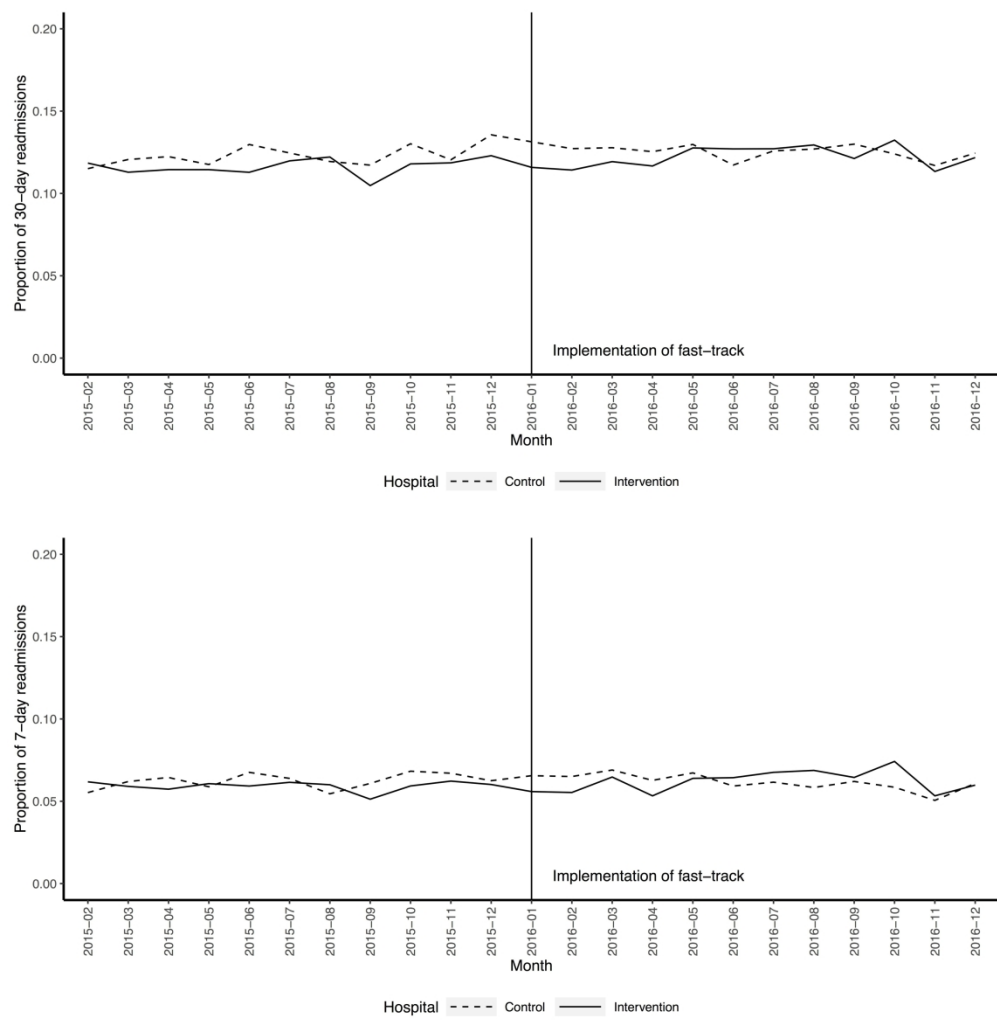

Proportion of emergency department 7-day and 30-day readmissions during the study period  
266x280mm (300 x 300 DPI)

## **SUPPLEMENTARY APPENDIX 1: Emergency department fast-track admission criteria**

### **Exclusion criteria**

- Dependent in everyday life
- Age > 65 years
- Pain on visual analogic scale  $\geq 8/10$

### **Triage**

If the answer to all following questions is no, the patient can be managed in the fast-track

- Need to undress patient for assessment/treatment
- Patient needs to be in supine position
- Need for blood sampling
- Patient needs major wound suture

### **Trauma patients managed in the fast-track**

- Trauma not requiring major analgesics
- Contusions and benign trauma, for patients WITHOUT anticoagulant medication
- Cranial trauma without initial loss of consciousness
- Minor wounds, except on tongue, eye, or scalp
- Abscess, minor subcutaneous tissue infection, subcutaneous foreign body
- Minor burn injuries except on face
- Wound management

### **Medical patients managed in the fast-track**

#### **Gastro-enterology**

- Foreign body ingestion
- Constipation/diarrhea
- Acid reflux disease

**Ophthalmology**

- Ocular foreign body
- Conjunctivitis
- Palpebral infection

**Urology**

- Uncomplicated lower urinary tract infections

**Oto-rhino-laryngology**

- Epistaxis
- Ear pain
- Dental abscess

**Dermatology**

- Skin rash
- Benign skin disease without fever
- Insect bites

**Others**

- Urgent treatment injections

**STROBE 2007 (v4) Statement—Checklist of items that should be included in reports of *cohort studies***

| Section/Topic                | Item # | Recommendation                                                                                                                                                                       | Reported on page # |
|------------------------------|--------|--------------------------------------------------------------------------------------------------------------------------------------------------------------------------------------|--------------------|
| Title and abstract           | 1      | (a) Indicate the study's design with a commonly used term in the title or the abstract                                                                                               | 1                  |
|                              |        | (b) Provide in the abstract an informative and balanced summary of what was done and what was found                                                                                  | 1                  |
| <b>Introduction</b>          |        |                                                                                                                                                                                      |                    |
| Background/rationale         | 2      | Explain the scientific background and rationale for the investigation being reported                                                                                                 | 2                  |
| Objectives                   | 3      | State specific objectives, including any prespecified hypotheses                                                                                                                     | 3                  |
| <b>Methods</b>               |        |                                                                                                                                                                                      |                    |
| Study design                 | 4      | Present key elements of study design early in the paper                                                                                                                              | 3                  |
| Setting                      | 5      | Describe the setting, locations, and relevant dates, including periods of recruitment, exposure, follow-up, and data collection                                                      | 3                  |
| Participants                 | 6      | (a) Give the eligibility criteria, and the sources and methods of selection of participants. Describe methods of follow-up                                                           | 3                  |
|                              |        | (b) For matched studies, give matching criteria and number of exposed and unexposed                                                                                                  | N/A                |
| Variables                    | 7      | Clearly define all outcomes, exposures, predictors, potential confounders, and effect modifiers. Give diagnostic criteria, if applicable                                             | 5                  |
| Data sources/<br>measurement | 8*     | For each variable of interest, give sources of data and details of methods of assessment (measurement). Describe comparability of assessment methods if there is more than one group | 5                  |
| Bias                         | 9      | Describe any efforts to address potential sources of bias                                                                                                                            | 6                  |
| Study size                   | 10     | Explain how the study size was arrived at                                                                                                                                            | 7                  |
| Quantitative variables       | 11     | Explain how quantitative variables were handled in the analyses. If applicable, describe which groupings were chosen and why                                                         | 6                  |
| Statistical methods          | 12     | (a) Describe all statistical methods, including those used to control for confounding                                                                                                | 6                  |
|                              |        | (b) Describe any methods used to examine subgroups and interactions                                                                                                                  | 6                  |
|                              |        | (c) Explain how missing data were addressed                                                                                                                                          | 7                  |
|                              |        | (d) If applicable, explain how loss to follow-up was addressed                                                                                                                       | N/A                |
|                              |        | (e) Describe any sensitivity analyses                                                                                                                                                | N/A                |
| <b>Results</b>               |        |                                                                                                                                                                                      | N/A                |

|                          |     |                                                                                                                                                                                                              |          |
|--------------------------|-----|--------------------------------------------------------------------------------------------------------------------------------------------------------------------------------------------------------------|----------|
| Participants             | 13* | (a) Report numbers of individuals at each stage of study—eg numbers potentially eligible, examined for eligibility, confirmed eligible, included in the study, completing follow-up, and analysed            | Figure 1 |
|                          |     | (b) Give reasons for non-participation at each stage                                                                                                                                                         | N/A      |
|                          |     | (c) Consider use of a flow diagram                                                                                                                                                                           | Figure 1 |
| Descriptive data         | 14* | (a) Give characteristics of study participants (eg demographic, clinical, social) and information on exposures and potential confounders                                                                     | 9        |
|                          |     | (b) Indicate number of participants with missing data for each variable of interest                                                                                                                          | Figure 1 |
|                          |     | (c) Summarise follow-up time (eg, average and total amount)                                                                                                                                                  | N/A      |
| Outcome data             | 15* | Report numbers of outcome events or summary measures over time                                                                                                                                               | 8        |
| Main results             | 16  | (a) Give unadjusted estimates and, if applicable, confounder-adjusted estimates and their precision (eg, 95% confidence interval). Make clear which confounders were adjusted for and why they were included | 11       |
|                          |     | (b) Report category boundaries when continuous variables were categorized                                                                                                                                    | 12       |
|                          |     | (c) If relevant, consider translating estimates of relative risk into absolute risk for a meaningful time period                                                                                             | N/A      |
| Other analyses           | 17  | Report other analyses done—eg analyses of subgroups and interactions, and sensitivity analyses                                                                                                               | 8        |
| <b>Discussion</b>        |     |                                                                                                                                                                                                              |          |
| Key results              | 18  | Summarise key results with reference to study objectives                                                                                                                                                     | 12       |
| <b>Limitations</b>       |     |                                                                                                                                                                                                              |          |
| Interpretation           | 20  | Give a cautious overall interpretation of results considering objectives, limitations, multiplicity of analyses, results from similar studies, and other relevant evidence                                   | 16       |
| Generalisability         | 21  | Discuss the generalisability (external validity) of the study results                                                                                                                                        | 12       |
| <b>Other information</b> |     |                                                                                                                                                                                                              |          |
| Funding                  | 22  | Give the source of funding and the role of the funders for the present study and, if applicable, for the original study on which the present article is based                                                | 17       |

\*Give information separately for cases and controls in case-control studies and, if applicable, for exposed and unexposed groups in cohort and cross-sectional studies.

**Note:** An Explanation and Elaboration article discusses each checklist item and gives methodological background and published examples of transparent reporting. The STROBE checklist is best used in conjunction with this article (freely available on the Web sites of PLoS Medicine at <http://www.plosmedicine.org/>, Annals of Internal Medicine at <http://www.annals.org/>, and Epidemiology at <http://www.epidem.com/>). Information on the STROBE Initiative is available at [www.strobe-statement.org](http://www.strobe-statement.org).

# BMJ Open

## The impact of the implementation of a fast-track on emergency department length of stay and quality of care indicators in the Champagne-Ardenne region: a difference-in-differences study

|                                 |                                                                                                                                                                                                                                                                                                                                                                                                                                                                                                                                                                                                                                                                                                                                                                                                                    |
|---------------------------------|--------------------------------------------------------------------------------------------------------------------------------------------------------------------------------------------------------------------------------------------------------------------------------------------------------------------------------------------------------------------------------------------------------------------------------------------------------------------------------------------------------------------------------------------------------------------------------------------------------------------------------------------------------------------------------------------------------------------------------------------------------------------------------------------------------------------|
| Journal:                        | <i>BMJ Open</i>                                                                                                                                                                                                                                                                                                                                                                                                                                                                                                                                                                                                                                                                                                                                                                                                    |
| Manuscript ID                   | bmjopen-2018-026200.R1                                                                                                                                                                                                                                                                                                                                                                                                                                                                                                                                                                                                                                                                                                                                                                                             |
| Article Type:                   | Research                                                                                                                                                                                                                                                                                                                                                                                                                                                                                                                                                                                                                                                                                                                                                                                                           |
| Date Submitted by the Author:   | 22-Jan-2019                                                                                                                                                                                                                                                                                                                                                                                                                                                                                                                                                                                                                                                                                                                                                                                                        |
| Complete List of Authors:       | Chrusciel, Jan; Centre Hospitalier de Troyes, Department of Medical Information and Performance Evaluation; University Hospitals of Reims, Department of Research and Public Health<br>Fontaine, Xavier; Manchester Hospital, Emergency Department<br>Devillard, Arnaud; Centre Hospitalier de Troyes, Emergency Department<br>Cordonnier, Aurélien; Manchester Hospital, Department of Medical Information<br>Kanagaratnam, Lukshe; University Hospitals of Reims, Department of Research and Public Health; Université de Reims Champagne-Ardenne, Faculty of Medicine, EA 3797<br>Laplanche, David; Centre Hospitalier de Troyes, Department of Medical Information and Performance Evaluation<br>Sanchez, Stéphane; Centre Hospitalier de Troyes, Department of Medical Information and Performance Evaluation |
| <b>Primary Subject Heading</b>: | Emergency medicine                                                                                                                                                                                                                                                                                                                                                                                                                                                                                                                                                                                                                                                                                                                                                                                                 |
| Secondary Subject Heading:      | Public health                                                                                                                                                                                                                                                                                                                                                                                                                                                                                                                                                                                                                                                                                                                                                                                                      |
| Keywords:                       | Emergency Department, Length of stay, Fast-track, Hospital readmissions, Healthcare Quality                                                                                                                                                                                                                                                                                                                                                                                                                                                                                                                                                                                                                                                                                                                        |
|                                 |                                                                                                                                                                                                                                                                                                                                                                                                                                                                                                                                                                                                                                                                                                                                                                                                                    |

SCHOLARONE™  
Manuscripts



# The impact of the implementation of a fast-track on emergency department length of stay and quality of care indicators in the Champagne-Ardenne region: a difference-in-differences study

Jan Chrusciel<sup>1,5</sup>, Xavier Fontaine<sup>2</sup>, Arnaud Devillard<sup>3</sup>, Aurélien Cordonnier<sup>4</sup>, Lukshe Kanagaratnam<sup>5,6</sup>, David Laplanche<sup>1</sup>, Stéphane Sanchez<sup>1</sup>

<sup>1</sup>Department of Medical Information and Performance Evaluation, Centre Hospitalier de Troyes, Troyes, France; <sup>2</sup>Emergency Department, Manchester Hospital, Charleville-Mézières, France; <sup>3</sup>Emergency Department, Centre Hospitalier de Troyes, Troyes, France; <sup>4</sup>Medical Information Department, Manchester Hospital, Charleville-Mézières, France. <sup>5</sup>Department of Research and Public Health, University Hospitals of Reims, Reims, France; <sup>6</sup>Faculty of Medicine, EA 3797, University of Reims Champagne-Ardenne, Reims, France

## Abstract

**Objectives:** We aimed to evaluate the effect of the implementation of a fast-track on Emergency Department (ED) length of stay (LOS) and quality of care indicators.

**Design:** Difference-in-differences analysis.

**Setting:** Two large hospitals in the Champagne-Ardenne region, France.

**Participants:** Patients admitted to the emergency department between 13 January 2015 and 13 January 2017.

**Intervention:** Implementation of a fast-track for patients with small injuries or benign medical conditions (13 January 2016).

**Primary and Secondary Outcome Measures:** Proportion of patients with LOS  $\geq$  4h and proportion of access block situations (when patients cannot access an appropriate hospital bed within 8 hours). 7-day readmissions and 30-days readmissions.

**Results:** The emergency department of the intervention hospital registered 53768 stays in 2016 and 57965 in 2017 (+7.8%). During the same period, the control hospital registered 42133 and 43696 stays respectively (+3.7%). In the intervention hospital, the mean length of stay was 261 minutes before the intervention and 248 minutes after the intervention. In the control hospital, the corresponding times were 262 and 265 minutes. The difference-in-differences (DID) estimator for ED LOS  $\geq$  4h was 0.80; 95% confidence interval (CI) 0.76 – 0.84). The DID estimator for access block was 1.12; 95% CI 1.03 – 1.22.

There was an increase in the proportion of 30-day readmissions in the intervention hospital (from 11.4% to 12.3%). An increase was also observed in the control group (from 12.0% to 12.6%). In the intervention hospital, after the intervention, the proportion of patients leaving without being seen by a physician decreased from 10.0% to 5.4%.

**Conclusions:** The implementation of a fast-track was associated with a decrease in stays lasting  $\geq$ 4 hours without a decrease in access block. Further studies are needed to evaluate the causes of variability in emergency department LOS and their connections to quality of care indicators.

Correspondence to: Jan Chrusciel, Department of Medical Information and Performance Evaluation, Centre Hospitalier de Troyes, 101 Avenue Anatole France, 10003 Troyes, France.

Tel: +33 (0) 3 26 78 77 63. Fax: + 33 (0) 3 25 49 49 50. E-mail: [jan.chrusciel.md@gmail.com](mailto:jan.chrusciel.md@gmail.com)

## Keywords

Emergency Department – Length of stay – Fast-track – Hospital readmissions – Healthcare Quality

### Strengths and Limitations of this study

- We measured the effect of the implementation of a fast-track on length of stay and quality of care indicators
- Regional trends were controlled for using a difference-in-differences approach
- The intervention was the only major change in the intervention hospital. No structural changes took place in the control hospital during the study period
- Further studies could include more hospitals

### Introduction

The number of annual emergency department (ED) visits has doubled between 1980 and 2004 in France [1], and is still rising (+3.7% between 2014 and 2015). This phenomenon has been observed in most developed countries [2], and is a challenge for physicians and policymakers. ED crowding was defined by the American College of Emergency Physicians (ACEP) as a mismatch between the need for emergency care and the emergency department's ability to provide this care [3]. ED crowding has been associated with longer ED length of stay (LOS) [4], inadequate pain management [5], and worse patient outcomes [6]. A crowded emergency department may sometimes need to fall back on ambulance diversion, redirecting patients to nearby hospitals. Finding the best organization for EDs is therefore a public health priority with ethical implications [3]. The causes of ED crowding include increased demand from patients, epidemics, lack of trained staff, and lack of hospital beds [7]. Numerous scores have been proposed to measure ED crowding (EDWIN, NEDOCS, READI, Work Score) however their predictive power typically does not outperform simpler indicators such as bed occupancy [8,9]. Time series analysis can predict emergency department activity with a Relative Mean Absolute Performance (RMAP) of 90% [10]. A

1  
2  
3 shorter length of stay results in less complications [11,12], higher odds of survival for severe  
4 patients [13], increased patient satisfaction [14,15], and lower healthcare spending [16]. The  
5 optimization of patient flow has been studied extensively [17,18]. Numerous strategies have  
6 been proposed to regulate patient flow in the emergency department : Care Coordination  
7 Teams, whose mission involves orienting older patients towards appropriate healthcare,  
8 observation units (caring for patients up to 72h), chest pain units, home-based healthcare  
9 [19]. A common strategy is the use of fast-tracks, dedicated pathways aimed towards the  
10 fast delivery of healthcare for patients with benign medical conditions scheduled for rapid  
11 discharge. Fast-tracks have been implemented in small and larger hospitals [20]. In 2002,  
12 58% of 17 surveyed Australian public hospitals functioned with a fast-track [19]. A Monte-  
13 Carlo simulation showed that implementing a fast-track with a dedicated nurse could  
14 shorten median waiting times up to 35% [21]. Previous studies have evaluated the effect of  
15 implementing a fast-track [22–25], however the length of these studies was short, typically  
16 less than 6 months. One 2-year study with a fast-track staffed with mid-level providers did  
17 not adjust for patient severity or regional trends [26]. The aim of this study was to assess  
18 the impact of an emergency department restructuring with the implementation of a fast-  
19 track on ED length of stay in the setting of a large hospital in France. Secondary objectives  
20 were to study predictors of ED LOS, and to assess the effect of the emergency department  
21 restructuring on 7-day readmissions, 30-day readmissions, and the proportion of patients  
22 leaving without being seen.  
23  
24  
25  
26  
27  
28  
29  
30  
31  
32  
33  
34  
35  
36  
37  
38  
39  
40  
41  
42  
43  
44  
45  
46  
47  
48  
49  
50

## 51 52 53 54 **Methods**

55  
56  
57 We conducted a difference-in-differences analysis [27,28]. This method is classically used in  
58 economics [29] and involves a control group to attempt to model the counterfactual: what  
59  
60

1  
2  
3 would have happened if the intervention group had continued evolving with a common  
4  
5 trend with the control group before the intervention.  
6  
7  
8  
9

## 10 **Population**

11  
12 The region in which the study took place is one of the least densely populated regions in  
13  
14 France. The age structure of the region resembles the pooled age structure of the rest of the  
15  
16 country. The intervention hospital (Troyes Hospital) was a large hospital with 442 medical  
17  
18 beds, 127 surgical beds and 63 beds dedicated to gynaecology and obstetrics, serving an  
19  
20 area of approximately 40 kilometres radius (25 miles). The emergency department hosted  
21  
22 an observation unit. The control hospital (Manchester Hospital, located in Charleville-  
23  
24 Mézières) was in the same region, and had 375 medical bed, 101 surgical beds, and 63 beds  
25  
26 for gynaecology and obstetrics.  
27  
28  
29  
30  
31  
32  
33  
34

## 35 **Patient and Public involvement**

36  
37 Patients were not involved in the design or analysis of this study.  
38  
39  
40  
41

## 42 **Intervention**

43  
44 The intervention included an extension of the ED from 15 to 27 consultation rooms and the  
45  
46 opening of a fast-track for patients with small injuries or benign medical conditions. The  
47  
48 fast-track in the intervention hospital had 6 rooms. The fast-track is a healthcare pathway  
49  
50 for the assessment and treatment of low severity patients, situated in a dedicated area of  
51  
52 the emergency department. The intervention was implemented on 13 January 2016. Two ED  
53  
54 physicians managed adult patients and paediatric traumatology in the fast-track. When ED  
55  
56 physicians were not available, they were replaced by residents. Gynaecology and psychiatry  
57  
58  
59  
60

patients could also be managed in dedicated areas of the fast-track. Entry criteria for the fast-track were pre-defined in a protocol (Supplementary Appendix 1).

## Outcomes

The main outcome was an emergency department length of stay  $\geq 4$  hours [30,31]. LOS was defined as the time elapsed between registration in the ED to the time the patient leaves the ED. The secondary outcome was access block, defined by the Australasian College for Emergency Medicine as the situation where patients who need hospital care cannot access an appropriate hospital bed within a reasonable delay (8 hours) [32]. We used the Patient State (PS) classification [10] presented in Table 1 to identify patients that needed to be admitted to the hospital (PS 3, 4, 5, 6 and 7). Time to physician appraisal and LOS were extracted from local hospital databases (data extracted from Resurgences© in the intervention hospital and Urqual© in the control hospital). Other quality of care indicators included the number of patients leaving without being seen [33] and the monthly proportion of 30-day and 7-day readmissions [34].

**Table 1:** Patient State (PS) classification for patients admitted to the emergency department

| PS class | Description                                                                   |
|----------|-------------------------------------------------------------------------------|
| PS1      | Patient with moderate treatment, discharged from emergency department         |
| PS2      | Patient with major treatment, discharged from emergency department            |
| PS3      | Patient with moderate treatment, hospitalized after emergency department stay |
| PS4      | Patient with major treatment, hospitalized after emergency department stay    |
| PS5      | Patients requiring immediate treatment, not elsewhere classified              |
| PS6      | Patients requiring immediate intensive care/resuscitation                     |
| PS7      | Died in emergency Department                                                  |

## Statistical methods

1  
2  
3 Continuous variables were summarized with means and standard deviations. Categorical  
4 variables were presented with absolute frequencies and proportions. A descriptive analysis  
5  
6 variables were presented with absolute frequencies and proportions. A descriptive analysis  
7  
8 was carried out for LOS by period and by location. Summary statistics were provided for the  
9  
10 waiting times of patients with selected diagnoses (pneumonia, stroke, myocardial infarction  
11  
12 and heart failure). To facilitate modelling, length of stay was transformed into a binary  
13  
14 variable using thresholds classically found in the literature [31]. Separate models were  
15  
16 fitted to study the primary outcome and access block. The effect of the intervention on the  
17  
18 primary outcome was evaluated for all patients. The effect of the intervention on access  
19  
20 block was evaluated in an analysis restricted to patients who needed to be hospitalized after  
21  
22 their emergency department stay. Multiple logistic regression models were estimated with  
23  
24 Generalized Estimating Equations [35] to account for the within-patient correlation in LOS.  
25  
26 The difference-in-difference estimate was modelled as the coefficient of the interaction  
27  
28 between time (before or after the intervention) and location. The indicator variable for  
29  
30 calculating the difference-in-difference estimate was coded 1 in the “post” period for the  
31  
32 intervention hospital, and 0 otherwise. The model was  $\text{Logit}(p) = \alpha + \pi P + \gamma L + \delta D + T'\tau + X'\beta$ ,  
33  
34 with  $p$  being the probability of the outcome,  $\alpha$  the intercept,  $P$  an indicator variable for  
35  
36 period,  $L$  an indicator variable for location,  $D$  the interaction between period and location  
37  
38 (difference-in-differences indicator),  $T$  a vector of additional time variables (effect of being  
39  
40 admitted during the night, the weekend or winter months) and  $X$  a vector of individual-level  
41  
42 covariates. Age was grouped in categories relevant to clinical practice. Primary diagnosis  
43  
44 was defined using chapters of the International Classification of Disease (10<sup>th</sup> revision) to  
45  
46 avoid problems in estimation due to sparse data. Patient severity was included in the model  
47  
48 using the PS classification [10]. If one of the components of the PS classification was  
49  
50 missing, PS was imputed to the most likely category based on available data in the  
51  
52  
53  
54  
55  
56  
57  
58  
59  
60

1  
2  
3 classification (11.9% of cases). Time variables included indicator variables for admission  
4 during the night (22:00 – 06:00), and during weekends (Saturday and Sunday). An indicator  
5 variable for December and January, where flu epidemics often occur, was included in the  
6 model. The study sample was a convenience sample with a time window constructed  
7 symmetrically around the intervention, allowing to control for seasonal effects. Statistical  
8 analyses were performed using SAS software version 9.4 (The SAS Institute Inc., Cary, NC,  
9 USA). Data management and figures were realised using R version 3.3.4 [36].  
10  
11  
12  
13  
14  
15  
16  
17  
18  
19  
20  
21  
22

### 23 **Ethics Statement**

24 All legal requirements for epidemiological studies were respected, and the French national  
25 commission governing the application of data privacy laws issued an approval for the  
26 project. Since the study was strictly observational, in accordance with the laws that regulate  
27 “non-interventional clinical research” in France, namely articles L.1121-1 and R.1121-2 of  
28 the Public Health Code, it did not require a written informed consent from participants or  
29 approval from an ethics committee.  
30  
31  
32  
33  
34  
35  
36  
37  
38  
39  
40  
41  
42

### 43 **Results**

44  
45 Between 13 January 2015 and 13 January 2017, 111733 ED stays were registered in the  
46 intervention hospital, and 85829 in the control hospital (Figure 1).  
47  
48  
49  
50  
51

### 52 **Figure 1** Flowchart

53  
54  
55  
56  
57 The Emergency department of the intervention hospital registered 53768 stays in 2016 and  
58 57965 in 2017 (+7.8%). During the same period, the control hospital registered 42133 and  
59  
60

43696 admissions respectively (+3.7%). Regarding human resources, in the intervention hospital, physicians increased from 11.5 to 14.5 Full-Time Equivalents (FTE), nurses from 35.3 to 36.8 FTE, and assistant nurses from 16.8 to 19.5 FTE. Mean age was higher in the control hospital (Table 2). The mean length of stay in the intervention hospital ED was 261 min (Standard Deviation 213) before the intervention and 248 min (SD 217) after the intervention. In the control group, the mean length of stay before the intervention was 262 min (SD 392) and 265 min (SD 393) after the intervention. In the intervention hospital, the proportion of patients with LOS < 4 hours changed from 55.2% to 60.6%. The proportion of patients with LOS < 4 hours was stable in the control group. Within the subgroups of patients subsequently admitted to the intervention hospital, patients consulting for pneumonia had a decrease in mean time to physician assessment after the intervention: from 128 min (SD 122.5) to 123 min (SD 123.9). Stroke patients also had decreased waiting times: from 108 (SD 111) to 90 (SD 89) minutes. The time to physician assessment remained unchanged for patients consulting for myocardial infarction and heart failure: from 110 (SD 115) before the intervention to 109 (SD 114) minutes after the intervention.

**Table 2: Demographic characteristics of study population, length of stay and readmissions in the intervention and control hospitals**

|          | Intervention                        |                                     | P-value | Control                             |                                     | P-value |
|----------|-------------------------------------|-------------------------------------|---------|-------------------------------------|-------------------------------------|---------|
|          | 2015-2016*<br>mean (SD) or<br>n (%) | 2016-2017†<br>mean (SD) or<br>n (%) |         | 2015-2016*<br>mean (SD) or<br>n (%) | 2016-2017†<br>mean (SD) or<br>n (%) |         |
| <i>n</i> | 53768                               | 57965                               | -       | 42133                               | 43696                               | -       |



|                                                                       |                    |                    |                     |                    |                    |                     |
|-----------------------------------------------------------------------|--------------------|--------------------|---------------------|--------------------|--------------------|---------------------|
| <b>Age (years): mean (SD)</b>                                         | 40.4 (27.3)        | 39.8 (27.4)        | <0.001 <sup>‡</sup> | 45.4 (25.3)        | 45.4 (25.2)        | 0.81 <sup>‡</sup>   |
| <b>Sex: female – n (%)</b>                                            | 26712 (49.7)       | 29235 (50.4)       | 0.001 <sup>§</sup>  | 20171 (47.9)       | 21338 (48.8)       | 0.005 <sup>§</sup>  |
| <b>Length of stay (min): mean (SD)</b>                                | 260.67<br>(212.65) | 248.36<br>(216.96) | <0.001 <sup>‡</sup> | 262.78<br>(392.34) | 265.04<br>(392.48) | 0.40 <sup>‡</sup>   |
| <b>7-day readmissions: n (%)</b>                                      | 3177 (5.9)         | 3642 (6.3)         | 0.01 <sup>§</sup>   | 2600 (6.2)         | 2689 (6.2)         | 0.92 <sup>§</sup>   |
| <b>30-day readmissions: n (%)</b>                                     | 6105 (11.4)        | 7129 (12.3)        | <0.001 <sup>§</sup> | 5048 (12.0)        | 5489 (12.6)        | 0.01 <sup>§</sup>   |
| <b>Patients admitted to hospital after emergency department: n</b>    | 14795              | 14864              | -                   | 7530               | 7592               | -                   |
| <b>Length of stay (min): mean (SD)</b>                                | 342 (221)          | 367 (251)          | <0.001 <sup>‡</sup> | 536 (532)          | 566 (554)          | <0.001 <sup>‡</sup> |
| <b>Patients not admitted to hospital after emergency department n</b> | 38971              | 43100              | -                   | 34603              | 36104              | -                   |
| <b>Length of stay (min): mean (SD)</b>                                | 230 (201)          | 208 (188)          | <0.001 <sup>‡</sup> | 203 (325)          | 201 (314)          | 0.51 <sup>‡</sup>   |

SD: Standard Deviation. ICD-10: International Classification of Disease, 10<sup>th</sup> revision.

\* 13/01/2015 to morning of 13/01/2016. † 13/01/2016 afternoon to 13/01/2017. ‡ Student's *t* test. §  $\chi^2$  test

The exponentiated difference-in-differences estimate was 0.798 (95% CI 0.762 - 0.836,  $p < 0.0001$ ), therefore the intervention successfully reduced the number of ED stays with LOS  $\geq 4$  hours (Table 3). This coefficient can be interpreted as a ratio of odds ratios. However, the estimate for access block was 1.121 (95% CI 1.029 - 1.222,  $p = 0.009$ ): the intervention did not seem effective in helping the patients who needed it to access an appropriate hospital bed in a reasonable amount of time ( $< 8$ h). Age was linearly related with length of stay, with younger patients having a shorter LOS. Weekends were associated with a shorter LOS. Patients admitted for injuries (ICD-10 codes S00 to T98) and skin problems (L00 to L99) tended to have a short LOS, while patients admitted for neoplasms (C00 to D48) or neurologic diseases (G00 – G99) tended to have a longer LOS. Trends in daily mean LOS are shown in Figure 2.

**Figure 2** Daily mean emergency department length of stay during the study period (trends obtained by locally weighted regression).

### Effect on quality of care indicators

Overall, 12.0% of stays were 30-day readmissions. Most readmissions (6.1%) occurred within the first seven days. There was a trend for increasing 30-day readmissions during the study period (Figure 3). Seven-day readmissions increased from 5.9% to 6.3% in the intervention group, and remained stable (6.2%) in the control group. In the intervention hospital, after the intervention, the proportion of patients leaving without being seen by a physician decreased from 10.0% to 5.4%.

**Figure 3** Proportion of emergency department 7-day and 30-day readmissions during the study period

**Table 3:** Multivariable logistic regression fitted with Generalized Estimating Equations for length of stay  $\geq$  4h and access block.

| Variable                                                       | Odds Ratio<br>(emergency department length of stay $\geq$ 4 hours for all patients)* | 95% Confidence Interval | Odds Ratio<br>(Access block: emergency department length of stay $\geq$ 8h for hospitalized patients)* | 95% Confidence Interval |
|----------------------------------------------------------------|--------------------------------------------------------------------------------------|-------------------------|--------------------------------------------------------------------------------------------------------|-------------------------|
| Location $\times$ Period interaction                           | 0.798                                                                                | (0.762 - 0.836)         | 1.121                                                                                                  | (1.029 - 1.222)         |
| Period: after intervention (reference = before intervention)   | 0.967                                                                                | (0.934 - 1.001)         | 1.097                                                                                                  | (1.027 - 1.172)         |
| Location: intervention hospital (reference = control hospital) | 2.41                                                                                 | (2.317 - 2.507)         | 0.718                                                                                                  | (0.672 - 0.767)         |
| 7-day readmission                                              | 0.906                                                                                | (0.861 - 0.953)         | 0.894                                                                                                  | (0.82 - 0.975)          |

|                                                               |               |                 |               |                 |
|---------------------------------------------------------------|---------------|-----------------|---------------|-----------------|
| <b>Weekend day</b>                                            | 0.896         | (0.873 - 0.919) | 0.849         | (0.808 - 0.892) |
| <b>Night</b>                                                  | 0.749         | (0.724 - 0.775) | 1.51          | (1.422 - 1.604) |
| <b>Principal Diagnosis (ICD-10 Chapter)</b>                   |               |                 |               |                 |
| <b>Injury, poisoning</b>                                      | 0.400         | (0.375 - 0.427) | 0.578         | (0.529 - 0.632) |
| <b>Diseases of the nervous system</b>                         | 1.903         | (1.713 - 2.114) | 1.266         | (1.119 - 1.444) |
| <b>Skin and subcutaneous tissue</b>                           | 0.418         | (0.377 - 0.463) | 0.606         | (0.483 - 0.761) |
| <b>Neoplasms</b>                                              | 1.715         | (1.253 - 2.348) | 2.588         | (1.941 - 3.45)  |
| <b>Diseases of the circulatory system</b>                     | 1 (Reference) | -               | 1 (Reference) | -               |
| <b>Month: December and January (reference = other months)</b> | 1.121         | (1.088 - 1.155) | 1.324         | (1.255 - 1.396) |
| <b>Severity (PS classification)</b>                           |               |                 |               |                 |
| <b>PS1</b>                                                    | 1 (Reference) | -               | -             | -               |
| <b>PS2</b>                                                    | 0.753         | (0.725 - 0.781) | -             | -               |
| <b>PS3</b>                                                    | 2.584         | (2.5 - 2.671)   | 1 (Reference) | -               |
| <b>PS4</b>                                                    | 3.083         | (2.941 - 3.231) | 0.875         | (0.832 - 0.92)  |
| <b>PS5</b>                                                    | 1.225         | (1.064 - 1.411) | 0.783         | (0.686 - 0.894) |
| <b>PS6</b>                                                    | 0.38          | (0.307 - 0.47)  | 0.305         | (0.23 - 0.403)  |
| <b>PS7</b>                                                    | 0.436         | (0.279 - 0.682) | 0.416         | (0.251 - 0.691) |
| <b>Sex: Female (reference = male)</b>                         | 0.972         | (0.949 - 0.996) | 1.032         | (0.988 - 1.078) |
| <b>Age (years)</b>                                            |               |                 |               |                 |
| <b>50 - 64</b>                                                | 1.693         | (1.635 - 1.753) | 1.340         | (1.248 - 1.438) |
| <b>65 - 74</b>                                                | 2.279         | (2.182 - 2.38)  | 1.544         | (1.431 - 1.665) |
| <b>75 - 89</b>                                                | 3.395         | (3.268 - 3.527) | 1.786         | (1.677 - 1.903) |
| <b>≥ 90</b>                                                   | 4.250         | (3.979 - 4.539) | 1.748         | (1.606 - 1.903) |
| <b>0 - 17</b>                                                 | 0.259         | (0.248 - 0.270) | 0.078         | (0.064 - 0.096) |
| <b>18 - 50</b>                                                | 1 (Reference) | -               | 1 (Reference) | -               |

ICD-10: International Classification of Disease, 10<sup>th</sup> revision. PS: Patient State

\* Multivariable analysis adjusted for age, sex, time of the day (nighttime or daytime), time in the week (weekend day or weekday), time of the year (December and January or other months, admission diagnosis (grouped using ICD-10 chapters) and severity (using the PS classification).

## Discussion

Our study showed that implementing a fast-track can decrease the mean length of stay and number of stays lasting  $\geq 4$  hours in the emergency department of a large general hospital.

1  
2  
3 We did not observe a decrease in LOS for patients requiring hospitalization. However, the  
4 length of stay for severe patients may have been limited by hospital-level bed availability  
5 rather than ED-related factors [37]. Indeed, other studies have found that the  
6 implementation of a fast-track did not adversely affect LOS for patients subsequently  
7 admitted to the hospital [38].

8  
9  
10  
11  
12  
13  
14  
15 The addition of new beds to the emergency department could explain part of our results.  
16 However, the addition of new beds does not guarantee improved access to care. In a study  
17 by Han et al., the time between ambulance diversion episodes was not significantly different  
18 after expanding an ED from 28 to 53 beds [39].

19  
20  
21  
22  
23  
24  
25 Asplin et al. consider the emergency department as a system with 3 components : *input*,  
26 *throughput*, and *output* [40]. The input component includes events, diseases or other  
27 factors that contribute to the demand for urgent care. Throughput includes triage, room  
28 placement, diagnosis and treatment. The implementation of the fast-track can accelerate  
29 throughput for patients not subsequently admitted to the hospital. The decrease in LOS can  
30 be explained by decreased crowding due to rapid patient discharge, floorplan modifications  
31 allowing faster patient transfers, or physician and nurse role adjustments [41,42]. Fast-  
32 tracks can efficiently coexist with other patient streams, such as tracks dedicated to  
33 complex ambulant patients [43]. Regarding output, the limiting factor for ED LOS is often  
34 lack of available hospital beds. Some authors have suggested that an occupancy of 85% is a  
35 suitable target to ensure that new patients are not left without beds [44]. This seems  
36 difficult to implement under current conditions. A systematic review of 220 articles  
37 discussing strategies to prevent « access block » [32] mentions interventions to diminish the  
38 number of patients admitted to the ED and observation wards [45]. Other solutions to  
39 prevent ED crowding are: sharing optimal care processes [46], enrolling additional staff [8],  
40  
41  
42  
43  
44  
45  
46  
47  
48  
49  
50  
51  
52  
53  
54  
55  
56  
57  
58  
59  
60

1  
2  
3 or eventually redirecting patients towards other centers [7]. Causes of increased demand for  
4  
5 urgent care include the ageing of populations, with a higher prevalence of chronic diseases,  
6  
7 the scarcity of primary care, and changing perceptions of what is considered urgent.  
8  
9 Solitude is a major driver of ED consultations [47]. The efficacy of gatekeeping procedures  
10  
11 has yet to be evaluated [48]. The patients that frequently consult in the emergency  
12  
13 department, however, are often disadvantaged by a low socio-economic status [49] and can  
14  
15 be considered a high-risk group regarding morbidity and mortality [50]. Prior contact with  
16  
17 the ED could help improve communication with the patient, although an effect on the  
18  
19 number of ED admissions remains to be established [51]. Pain is a major complaint in the  
20  
21 ED, and patients with chronic pain could be more likely to consult [52]. Access to  
22  
23 programmed care is crucial, and patients who cannot access programmed care will come  
24  
25 back to the emergency department. In an Australian study, around half of patients would  
26  
27 prefer to see a general practitioner for a similar problem than to be treated in the  
28  
29 emergency fast-track [53]. In this regard, what is happening in emergency departments can  
30  
31 be seen as a mirror of the dysfunctions in a healthcare system [54].

32  
33 After the implementation of the fast-track, the number of patients registered in the ED  
34  
35 increased by 7.8%. This increase was higher than in the control group. This is unlikely to be a  
36  
37 fluctuation in epidemiological trends, but rather reflects an increased demand generated by  
38  
39 an easier access to timely care. Patients leaving without being seen diminished from 10.0%  
40  
41 to 5.4%, similar to the proportions in studies by Combs et al [55] and Sanchez et al. [26].

42  
43 Among other quality of care indicators, we evaluated emergency department 7 and 30-day  
44  
45 readmissions [56]. The main rationale for including these indicators was to appreciate the  
46  
47 extent by which the decrease in LOS was explained by readmissions of the same patients.  
48  
49 Seven-day readmissions increased in the intervention hospital after the implementation of  
50  
51  
52  
53  
54  
55  
56  
57  
58  
59  
60

1  
2  
3 the fast-track. Patients coming back to the hospital within 7 days had shorter lengths of stay  
4 during the readmission. One possible explanation is the availability of the patient's recent  
5 history, making medical assessment simpler. Emergency departments may have a role to  
6 play in preventing hospital readmissions [57]. However, recent studies show that hospital  
7 readmissions are often not avoidable, and are largely influenced by factors on which  
8 hospitals have no control, like socio-economic status [34,58]. As is often the case, these  
9 indicators need to be appraised in conjunction with other quality of care indicators.

10  
11 We were able to control for regional trends with the inclusion of a control hospital. The  
12 intervention that took place in the intervention group was the only major change in the  
13 emergency department during this period. The control hospital did not undergo structural  
14 changes during the study period. The major limitation of our study was that the effect of  
15 implementing a fast-track was confounded with the addition of staff and new beds to the ED  
16 to allow it to function effectively under increased constraints. However, the reported  
17 increase in full-time equivalents was due to the administrative transfer of staff from the  
18 mobile unit for emergencies and intensive care. Only one additional nurse was fully  
19 allocated to the ED. As the mobile unit's main activity is to intervene outside of the hospital,  
20 it is unlikely that the changes in length of stay observed in the intervention hospital were  
21 entirely explained by the increase in human resources. Moreover, because supplemental  
22 beds were added to the ED as part of the intervention, the ratio of staff to beds decreased.  
23 Another limitation was that the time intervals were evaluated using data from local  
24 emergency department information systems. There could have been discrepancies between  
25 hospitals in encoding admission and discharge times. However, it seems unlikely that this  
26 could change the results of the study. The difference-in-differences method is based on a  
27 hypothesis that intervention and control hospitals share common trends before the study  
28  
29  
30  
31  
32  
33  
34  
35  
36  
37  
38  
39  
40  
41  
42  
43  
44  
45  
46  
47  
48  
49  
50  
51  
52  
53  
54  
55  
56  
57  
58  
59  
60

1  
2  
3 period. In our study, the trends in both hospitals were graphically similar. Regional data  
4  
5 supports the hypothesis that the intervention hospital and the control hospital are subject  
6  
7 to common shocks. To conclude, our study showed an increase in short stays for low acuity  
8  
9 patients following the implementation of the fast-track. In this regard, the fast-track  
10  
11 consolidated the emergency department's role of compensating deficiencies in access to  
12  
13 primary care, without favourably impacting length of stay for severe patients. Hospital-level  
14  
15 bed availability is critical to ensure efficient healthcare for patients registered to the ED.  
16  
17 Studies including more hospitals and a larger array of quality of care indicators are  
18  
19 warranted to estimate the effect of implementing a fast-track on emergency department  
20  
21 performance and population health outcomes.  
22  
23  
24  
25  
26  
27  
28  
29

30 **Funding statement:** This research received no specific grant from any funding agency in the  
31  
32 public, commercial or not-for-profit sectors.  
33  
34

35 **Competing interests statement:** All authors have no competing interests to declare.  
36

37 **Author contributions:** JC, DL, AD, LK and SS designed the study. SS, DL, XF, AC contributed to  
38  
39 the acquisition of data. JC conducted the statistical analysis. JC, XF, AD, AC, DL, LK and SS  
40  
41 contributed to drafting the article or revising it critically for important intellectual content.  
42  
43  
44

45 All authors read and approved the final manuscript.  
46

47 **Acknowledgements:** We would like to thank Mohamed Afilal and Priscilla De Souza for their  
48  
49 contributions in data extraction.  
50  
51

52 **Data sharing statement:** To prevent dissemination of sensitive patient data, the dataset on  
53  
54 which this study was based was not made available to the public. Deidentified data can be  
55  
56 obtained from the corresponding author upon reasonable request - ORCID ID 0000-0002-  
57  
58 8364-6506.  
59  
60

1  
2  
3 **STROBE Checklist:** STROBE Checklist is provided as a Supplementary Material  
4  
5  
6  
7  
8  
9  
10

## 11 **References**

- 12 1 Cour des comptes. Les urgences médicales : constats et évolution récente. In: *Rapport*  
13 *public annuel 2007*. Paris: : Cour des comptes 2007. 1.
- 14 2 Pines JM, Hilton JA, Weber EJ, *et al*. International perspectives on emergency  
15 department crowding. *Acad Emerg Med Off J Soc Acad Emerg Med* 2011;**18**:1358–70.  
16 doi:10.1111/j.1553-2712.2011.01235.x
- 17 3 Moskop JC, Sklar DP, Geiderman JM, *et al*. Emergency Department Crowding, Part 1—  
18 Concept, Causes, and Moral Consequences. *Ann Emerg Med* 2009;**53**:605–11.  
19 doi:10.1016/j.annemergmed.2008.09.019
- 20 4 Chiu I-M, Lin Y-R, Syue Y-J, *et al*. The influence of crowding on clinical practice in the  
21 emergency department. *Am J Emerg Med* Published Online First: 4 July 2017.  
22 doi:10.1016/j.ajem.2017.07.011
- 23 5 Hwang U, Richardson LD, Sonuyi TO, *et al*. The effect of emergency department  
24 crowding on the management of pain in older adults with hip fracture. *J Am Geriatr Soc*  
25 2006;**54**:270–5. doi:10.1111/j.1532-5415.2005.00587.x
- 26 6 Sprivulis PC, Da Silva J-A, Jacobs IG, *et al*. The association between hospital  
27 overcrowding and mortality among patients admitted via Western Australian  
28 emergency departments. *Med J Aust* 2006;**184**:208–12.
- 29 7 Hoot NR, Aronsky D. Systematic review of emergency department crowding: causes,  
30 effects, and solutions. *Ann Emerg Med* 2008;**52**:126–36.  
31 doi:10.1016/j.annemergmed.2008.03.014
- 32 8 Hoot NR, Zhou C, Jones I, *et al*. Measuring and forecasting emergency department  
33 crowding in real time. *Ann Emerg Med* 2007;**49**:747–55.  
34 doi:10.1016/j.annemergmed.2007.01.017
- 35 9 Hoot N, Aronsky D. An Early Warning System for Overcrowding in the Emergency  
36 Department. *AMIA Annu Symp Proc* 2006;**2006**:339–43.
- 37 10 Afilal M, Yalaoui F, Dugardin F, *et al*. Forecasting the Emergency Department Patients  
38 Flow. *J Med Syst* 2016;**40**:175. doi:10.1007/s10916-016-0527-0
- 39 11 Carr BG, Kaye AJ, Wiebe DJ, *et al*. Emergency department length of stay: a major risk  
40 factor for pneumonia in intubated blunt trauma patients. *J Trauma* 2007;**63**:9–12.  
41 doi:10.1097/TA.0b013e31805d8f6b



- 12 Diercks DB, Roe MT, Chen AY, *et al.* Prolonged emergency department stays of non-ST-segment-elevation myocardial infarction patients are associated with worse adherence to the American College of Cardiology/American Heart Association guidelines for management and increased adverse events. *Ann Emerg Med* 2007;**50**:489–96. doi:10.1016/j.annemergmed.2007.03.033
- 13 Chalfin DB, Trzeciak S, Likourezos A, *et al.* Impact of delayed transfer of critically ill patients from the emergency department to the intensive care unit. *Crit Care Med* 2007;**35**:1477–83. doi:10.1097/01.CCM.0000266585.74905.5A
- 14 Bernstein SL, Aronsky D, Duseja R, *et al.* The effect of emergency department crowding on clinically oriented outcomes. *Acad Emerg Med Off J Soc Acad Emerg Med* 2009;**16**:1–10. doi:10.1111/j.1553-2712.2008.00295.x
- 15 Guttman A, Schull MJ, Vermeulen MJ, *et al.* Association between waiting times and short term mortality and hospital admission after departure from emergency department: population based cohort study from Ontario, Canada. *BMJ* 2011;**342**:d2983. doi:10.1136/bmj.d2983
- 16 Bayley MD, Schwartz JS, Shofer FS, *et al.* The financial burden of emergency department congestion and hospital crowding for chest pain patients awaiting admission. *Ann Emerg Med* 2005;**45**:110–7. doi:10.1016/j.annemergmed.2004.09.010
- 17 Jarvis PRE. Improving emergency department patient flow. *Clin Exp Emerg Med* 2016;**3**:63–8. doi:10.15441/ceem.16.127
- 18 Le Spégnane D, Cauterman M. *Rapport de fin de mission « Temps d'attente et de passage aux Urgences ». Juillet 2003 – mars 2005.* Paris: : Mission Nationale d'Expertise et d'Audit Hospitaliers 2005.
- 19 McD Taylor D, Bennett DM, Cameron PA. A paradigm shift in the nature of care provision in emergency departments. *Emerg Med J EMJ* 2004;**21**:681–4. doi:10.1136/emj.2004.017640
- 20 Kilic YA, Agalar FA, Kunt M, *et al.* Prospective, double-blind, comparative fast-tracking trial in an academic emergency department during a period of limited resources. *Eur J Emerg Med Off J Eur Soc Emerg Med* 1998;**5**:403–6.
- 21 Fitzgerald K, Pelletier L, Reznick MA. A Queue-Based Monte Carlo Analysis to Support Decision Making for Implementation of an Emergency Department Fast Track. *J Healthc Eng* 2017;**2017**:1–8. doi:10.1155/2017/6536523
- 22 Cooke M, Wilson S, Pearson S. The effect of a separate stream for minor injuries on accident and emergency department waiting times. *Emerg Med J EMJ* 2002;**19**:28–30. doi:10.1136/emj.19.1.28
- 23 Rogers T, Ross N, Spooner D. Evaluation of a 'see and treat' pilot study introduced to an emergency department. *Accid Emerg Nurs* 2004;**12**:24–7. doi:10.1016/j.aen.2003.08.005

- 1  
2  
3  
4  
5  
6  
7  
8  
9  
10  
11  
12  
13  
14  
15  
16  
17  
18  
19  
20  
21  
22  
23  
24  
25  
26  
27  
28  
29  
30  
31  
32  
33  
34  
35  
36  
37  
38  
39  
40  
41  
42  
43  
44  
45  
46  
47  
48  
49  
50  
51  
52  
53  
54  
55  
56  
57  
58  
59  
60
- 24 Ardagh MW, Wells JE, Cooper K, *et al.* Effect of a rapid assessment clinic on the waiting time to be seen by a doctor and the time spent in the department, for patients presenting to an urban emergency department: a controlled prospective trial. *N Z Med J* 2002;**115**:U28.
  - 25 Kwa P, Blake D. Fast track: has it changed patient care in the emergency department? *Emerg Med Australas EMA* 2008;**20**:10–5. doi:10.1111/j.1742-6723.2007.01021.x
  - 26 Sanchez M, Smally AJ, Grant RJ, *et al.* Effects of a fast-track area on emergency department performance. *J Emerg Med* 2006;**31**:117–20. doi:10.1016/j.jemermed.2005.08.019
  - 27 Dimick JB, Ryan AM. Methods for evaluating changes in health care policy: the difference-in-differences approach. *JAMA* 2014;**312**:2401–2. doi:10.1001/jama.2014.16153
  - 28 Tung Y-C, Chang H-Y, Chang G-M. Impact of bundled payments on hip fracture outcomes: a nationwide population-based study. *Int J Qual Health Care J Int Soc Qual Health Care* 2018;**30**:23–31. doi:10.1093/intqhc/mzx158
  - 29 Rajaram R, Chung JW, Jones AT, *et al.* Association of the 2011 ACGME Resident Duty Hour Reform With General Surgery Patient Outcomes and With Resident Examination Performance. *JAMA* 2014;**312**:2374–84. doi:10.1001/jama.2014.15277
  - 30 Gill SD, Lane SE, Sheridan M, *et al.* Why do “fast track” patients stay more than four hours in the emergency department? An investigation of factors that predict length of stay. *Emerg Med Australas EMA* Published Online First: 23 March 2018. doi:10.1111/1742-6723.12964
  - 31 Khanna S, Boyle J, Good N, *et al.* New emergency department quality measure: from access block to National Emergency Access Target compliance. *Emerg Med Australas EMA* 2013;**25**:565–72. doi:10.1111/1742-6723.12139
  - 32 Forero R, McCarthy S, Hillman K. Access block and emergency department overcrowding. *Crit Care* 2011;**15**:216. doi:10.1186/cc9998
  - 33 Broccoli MC, Moresky R, Dixon J, *et al.* Defining quality indicators for emergency care delivery: findings of an expert consensus process by emergency care practitioners in Africa. *BMJ Glob Health* 2018;**3**:e000479. doi:10.1136/bmjgh-2017-000479
  - 34 Graham KL, Auerbach AD, Schnipper JL, *et al.* Preventability of Early Versus Late Hospital Readmissions in a National Cohort of General Medicine Patients. *Ann Intern Med* 2018;**168**:766–74. doi:10.7326/M17-1724
  - 35 Zeger SL, Liang K-Y. Longitudinal Data Analysis for Discrete and Continuous Outcomes. *Biometrics* 1986;**42**:121–30. doi:10.2307/2531248
  - 36 R Core Team (2016). R: A language and environment for statistical computing. R Foundation for Statistical Computing, Vienna, Austria. URL <https://www.R-project.org/>.

- 1  
2  
3 37 Powell ES, Khare RK, Venkatesh AK, *et al.* The relationship between inpatient discharge  
4 timing and emergency department boarding. *J Emerg Med* 2012;**42**:186–96.  
5 doi:10.1016/j.jemermed.2010.06.028  
6  
7  
8 38 Considine J, Kropman M, Kelly E, *et al.* Effect of emergency department fast track on  
9 emergency department length of stay: a case-control study. *Emerg Med J EMJ*  
10 2008;**25**:815–9. doi:10.1136/emj.2008.057919  
11  
12 39 Han JH, Zhou C, France DJ, *et al.* The effect of emergency department expansion on  
13 emergency department overcrowding. *Acad Emerg Med Off J Soc Acad Emerg Med*  
14 2007;**14**:338–43. doi:10.1197/j.aem.2006.12.005  
15  
16  
17 40 Asplin BR, Magid DJ, Rhodes KV, *et al.* A conceptual model of emergency department  
18 crowding. *Ann Emerg Med* 2003;**42**:173–80. doi:10.1067/mem.2003.302  
19  
20  
21 41 Walley P. Designing the accident and emergency system: lessons from manufacturing.  
22 *Emerg Med J EMJ* 2003;**20**:126–30.  
23  
24 42 Kaushal A, Zhao Y, Peng Q, *et al.* Evaluation of fast track strategies using agent-based  
25 simulation modeling to reduce waiting time in a hospital emergency department.  
26 *Socioecon Plann Sci* 2015;**50**:18–31. doi:10.1016/j.seps.2015.02.002  
27  
28  
29 43 Grouse AI, Bishop RO, Gerlach L, *et al.* A stream for complex, ambulant patients reduces  
30 crowding in an emergency department. *Emerg Med Australas EMA* 2014;**26**:164–9.  
31 doi:10.1111/1742-6723.12204  
32  
33  
34 44 Cameron PA, Joseph AP, McCarthy SM. Access block can be managed. *Med J Aust*  
35 2009;**190**:364–8.  
36  
37 45 Kelen GD, Scheulen JJ, Hill PM. Effect of an emergency department (ED) managed acute  
38 care unit on ED overcrowding and emergency medical services diversion. *Acad Emerg*  
39 *Med Off J Soc Acad Emerg Med* 2001;**8**:1095–100.  
40  
41  
42 46 Hoffenberg S, Hill MB, Houry D. Does sharing process differences reduce patient length  
43 of stay in the emergency department? *Ann Emerg Med* 2001;**38**:533–40.  
44 doi:10.1067/mem.2001.119426  
45  
46  
47 47 Geller J, Janson P, McGovern E, *et al.* Loneliness as a predictor of hospital emergency  
48 department use. *J Fam Pract* 1999;**48**:801–4.  
49  
50 48 van Uden CJT, Winkens R, Wesseling G, *et al.* Use of out of hours services: a comparison  
51 between two organisations. *Emerg Med J EMJ* 2003;**20**:184–7.  
52 doi:10.1136/emj.20.2.184  
53  
54  
55 49 Lombrail P, Vitoux-Brot C, Bourrillon A, *et al.* Another look at emergency room  
56 overcrowding: accessibility of the health services and quality of care. *Int J Qual Health*  
57 *Care J Int Soc Qual Health Care* 1997;**9**:225–35.  
58  
59  
60

- 1  
2  
3  
4  
5  
6  
7  
8  
9  
10  
11  
12  
13  
14  
15  
16  
17  
18  
19  
20  
21  
22  
23  
24  
25  
26  
27  
28  
29  
30  
31  
32  
33  
34  
35  
36  
37  
38  
39  
40  
41  
42  
43  
44  
45  
46  
47  
48  
49  
50  
51  
52  
53  
54  
55  
56  
57  
58  
59  
60
- 50 Hansagi H, Edhag O, Allebeck P. High consumers of health care in emergency units: how to improve their quality of care. *Qual Assur Health Care Off J Int Soc Qual Assur Health Care* 1991;**3**:51–62.
- 51 Graber DJ, Ardagh MW, O'Donovan P, *et al.* A telephone advice line does not decrease the number of presentations to Christchurch Emergency Department, but does decrease the number of phone callers seeking advice. *N Z Med J* 2003;**116**:U495.
- 52 Cordell WH, Keene KK, Giles BK, *et al.* The high prevalence of pain in emergency medical care. *Am J Emerg Med* 2002;**20**:165–9.
- 53 Lutze M, Ross M, Chu M, *et al.* Patient perceptions of emergency department fast track: a prospective pilot study comparing two models of care. *Australas Emerg Nurs J AENJ* 2014;**17**:112–8. doi:10.1016/j.aenj.2014.05.001
- 54 Cohen L, Génisson C, Savary R-P. *Les urgences hospitalières: miroir des dysfonctionnements du système de santé*. Paris: : Comission des Affaires Sociales sur les Urgences Hospitalières 2017.
- 55 Combs S, Chapman R, Bushby A. Evaluation of Fast Track. *Accid Emerg Nurs* 2007;**15**:40–7. doi:10.1016/j.aaen.2006.07.006
- 56 Gupta A, Allen LA, Bhatt DL, *et al.* Association of the Hospital Readmissions Reduction Program Implementation With Readmission and Mortality Outcomes in Heart Failure. *JAMA Cardiol* 2018;**3**:44–53. doi:10.1001/jamacardio.2017.4265
- 57 Singh S, Lin Y-L, Nattinger AB, *et al.* Variation in Readmission Rates by Emergency Departments and Emergency Department Providers Caring for Patients After Discharge. *J Hosp Med* 2015;**10**:705–10. doi:10.1002/jhm.2407
- 58 McIlvennan CK, Eapen ZJ, Allen LA. Hospital readmissions reduction program. *Circulation* 2015;**131**:1796–803. doi:10.1161/CIRCULATIONAHA.114.010270

1  
2  
3  
4  
5  
6  
7  
8  
9  
10  
11  
12  
13  
14  
15  
16  
17  
18  
19  
20  
21  
22  
23  
24  
25  
26  
27  
28  
29  
30  
31  
32  
33  
34  
35  
36  
37  
38  
39  
40  
41  
42  
43  
44  
45  
46  
47  
48  
49  
50  
51  
52  
53  
54  
55  
56  
57  
58  
59  
60



Flowchart of the study

209x148mm (300 x 300 DPI)

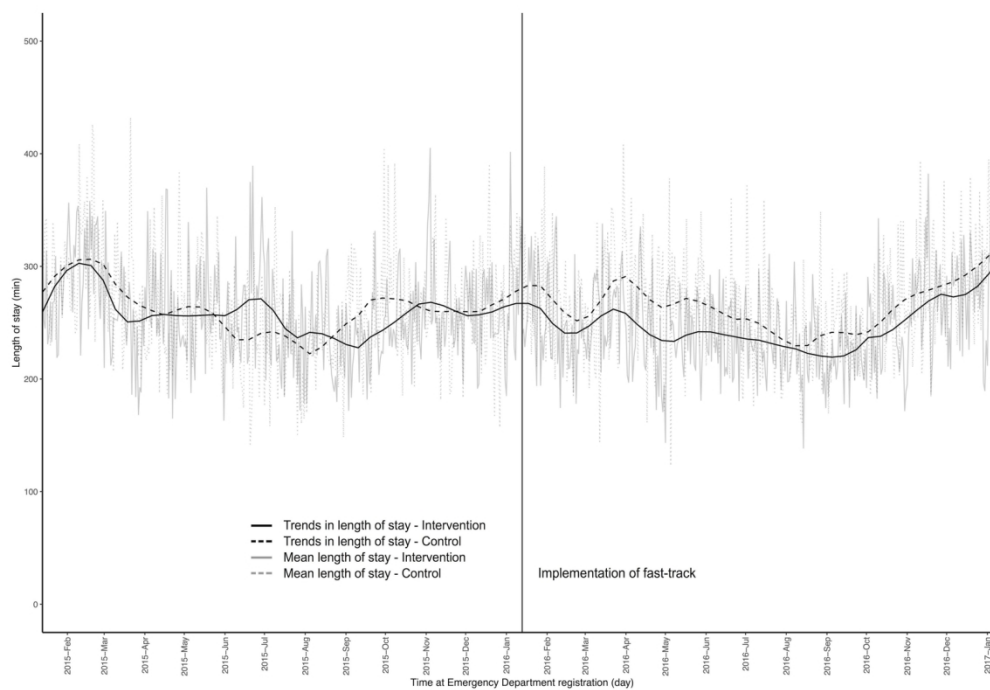

Daily mean emergency department length of stay during the study period, with trends obtained by locally weighted regression.

142x99mm (300 x 300 DPI)

1  
2  
3  
4  
5  
6  
7  
8  
9  
10  
11  
12  
13  
14  
15  
16  
17  
18  
19  
20  
21  
22  
23  
24  
25  
26  
27  
28  
29  
30  
31  
32  
33  
34  
35  
36  
37  
38  
39  
40  
41  
42  
43  
44  
45  
46  
47  
48  
49  
50  
51  
52  
53  
54  
55  
56  
57  
58  
59  
60



Proportion of emergency department 7-day and 30-day readmissions during the study period  
266x280mm (300 x 300 DPI)

**SUPPLEMENTARY APPENDIX 1: Emergency department fast-track admission criteria****Exclusion criteria**

- Disabled patients or patients with reduced autonomy
- Age > 65 years
- Pain on visual analogic scale  $\geq 8/10$

**Triage**

If the answer to all following questions is no, the patient can be managed in the fast-track:

- Need to undress the patient for assessment/treatment
- The patient needs to be in supine position
- Need for blood sampling
- The patient needs a wound suture with expected duration of > 20 min

**Trauma patients managed in the fast-track**

- Trauma not requiring major analgesics
- Contusions and benign trauma, for patients WITHOUT anticoagulant medication
- Cranial trauma without initial loss of consciousness
- Minor wounds, except on tongue, eye, or scalp
- Abscess, minor subcutaneous tissue infection, subcutaneous foreign body
- Minor burn injuries except on face
- Wound management

**Medical patients managed in the fast-track****Gastro-enterology**

- Foreign body ingestion
- Constipation/diarrhea
- Acid reflux disease

**Ophtalmology**

- Ocular foreign body
- Conjunctivitis
- Palpebral infection

**Urology**

- Uncomplicated lower urinary tract infections



**Oto-rhino-laryngology**

- Epistaxis
- Ear pain
- Dental abscess

**Dermatology**

- Skin rash
- Benign skin disease without fever
- Insect bites

**Others**

- Urgent local drugs administration (e.g. intracavernous phenylephrine)

For peer review only

**STROBE 2007 (v4) Statement—Checklist of items that should be included in reports of *cohort studies***

| Section/Topic                | Item # | Recommendation                                                                                                                                                                       | Reported on page # |
|------------------------------|--------|--------------------------------------------------------------------------------------------------------------------------------------------------------------------------------------|--------------------|
| <b>Title and abstract</b>    | 1      | (a) Indicate the study's design with a commonly used term in the title or the abstract                                                                                               | 1                  |
|                              |        | (b) Provide in the abstract an informative and balanced summary of what was done and what was found                                                                                  | 1                  |
| <b>Introduction</b>          |        |                                                                                                                                                                                      |                    |
| Background/rationale         | 2      | Explain the scientific background and rationale for the investigation being reported                                                                                                 | 2                  |
| Objectives                   | 3      | State specific objectives, including any prespecified hypotheses                                                                                                                     | 3                  |
| <b>Methods</b>               |        |                                                                                                                                                                                      |                    |
| Study design                 | 4      | Present key elements of study design early in the paper                                                                                                                              | 3                  |
| Setting                      | 5      | Describe the setting, locations, and relevant dates, including periods of recruitment, exposure, follow-up, and data collection                                                      | 4                  |
| Participants                 | 6      | (a) Give the eligibility criteria, and the sources and methods of selection of participants. Describe methods of follow-up                                                           | 4                  |
|                              |        | (b) For matched studies, give matching criteria and number of exposed and unexposed                                                                                                  | N/A                |
| Variables                    | 7      | Clearly define all outcomes, exposures, predictors, potential confounders, and effect modifiers. Give diagnostic criteria, if applicable                                             | 5                  |
| Data sources/<br>measurement | 8*     | For each variable of interest, give sources of data and details of methods of assessment (measurement). Describe comparability of assessment methods if there is more than one group | 5                  |
| Bias                         | 9      | Describe any efforts to address potential sources of bias                                                                                                                            | 6                  |
| Study size                   | 10     | Explain how the study size was arrived at                                                                                                                                            | 7                  |
| Quantitative variables       | 11     | Explain how quantitative variables were handled in the analyses. If applicable, describe which groupings were chosen and why                                                         | 6                  |
| Statistical methods          | 12     | (a) Describe all statistical methods, including those used to control for confounding                                                                                                | 6                  |
|                              |        | (b) Describe any methods used to examine subgroups and interactions                                                                                                                  | 6                  |
|                              |        | (c) Explain how missing data were addressed                                                                                                                                          | 7                  |
|                              |        | (d) If applicable, explain how loss to follow-up was addressed                                                                                                                       | N/A                |
|                              |        | (e) Describe any sensitivity analyses                                                                                                                                                | N/A                |
| <b>Results</b>               |        |                                                                                                                                                                                      | N/A                |

|                          |     |                                                                                                                                                                                                              |        |
|--------------------------|-----|--------------------------------------------------------------------------------------------------------------------------------------------------------------------------------------------------------------|--------|
| Participants             | 13* | (a) Report numbers of individuals at each stage of study—eg numbers potentially eligible, examined for eligibility, confirmed eligible, included in the study, completing follow-up, and analysed            | Fig. 1 |
|                          |     | (b) Give reasons for non-participation at each stage                                                                                                                                                         | N/A    |
|                          |     | (c) Consider use of a flow diagram                                                                                                                                                                           | Fig. 1 |
| Descriptive data         | 14* | (a) Give characteristics of study participants (eg demographic, clinical, social) and information on exposures and potential confounders                                                                     | 8      |
|                          |     | (b) Indicate number of participants with missing data for each variable of interest                                                                                                                          | Fig. 1 |
|                          |     | (c) Summarise follow-up time (eg, average and total amount)                                                                                                                                                  | N/A    |
| Outcome data             | 15* | Report numbers of outcome events or summary measures over time                                                                                                                                               | 8      |
| Main results             | 16  | (a) Give unadjusted estimates and, if applicable, confounder-adjusted estimates and their precision (eg, 95% confidence interval). Make clear which confounders were adjusted for and why they were included | 10     |
|                          |     | (b) Report category boundaries when continuous variables were categorized                                                                                                                                    | 5      |
|                          |     | (c) If relevant, consider translating estimates of relative risk into absolute risk for a meaningful time period                                                                                             | N/A    |
| Other analyses           | 17  | Report other analyses done—eg analyses of subgroups and interactions, and sensitivity analyses                                                                                                               | 6      |
| <b>Discussion</b>        |     |                                                                                                                                                                                                              |        |
| Key results              | 18  | Summarise key results with reference to study objectives                                                                                                                                                     | 11     |
| <b>Limitations</b>       |     |                                                                                                                                                                                                              |        |
| Interpretation           | 20  | Give a cautious overall interpretation of results considering objectives, limitations, multiplicity of analyses, results from similar studies, and other relevant evidence                                   | 15     |
| Generalisability         | 21  | Discuss the generalisability (external validity) of the study results                                                                                                                                        | 12     |
| <b>Other information</b> |     |                                                                                                                                                                                                              |        |
| Funding                  | 22  | Give the source of funding and the role of the funders for the present study and, if applicable, for the original study on which the present article is based                                                | 15     |

\*Give information separately for cases and controls in case-control studies and, if applicable, for exposed and unexposed groups in cohort and cross-sectional studies.

**Note:** An Explanation and Elaboration article discusses each checklist item and gives methodological background and published examples of transparent reporting. The STROBE checklist is best used in conjunction with this article (freely available on the Web sites of PLoS Medicine at <http://www.plosmedicine.org/>, Annals of Internal Medicine at <http://www.annals.org/>, and Epidemiology at <http://www.epidem.com/>). Information on the STROBE Initiative is available at [www.strobe-statement.org](http://www.strobe-statement.org).

# BMJ Open

## The impact of the implementation of a fast-track on emergency department length of stay and quality of care indicators in the Champagne-Ardenne region: a difference-in-differences study

|                                 |                                                                                                                                                                                                                                                                                                                                                                                                                                                                                                                                                                                                                                                                                                                                                                                                                    |
|---------------------------------|--------------------------------------------------------------------------------------------------------------------------------------------------------------------------------------------------------------------------------------------------------------------------------------------------------------------------------------------------------------------------------------------------------------------------------------------------------------------------------------------------------------------------------------------------------------------------------------------------------------------------------------------------------------------------------------------------------------------------------------------------------------------------------------------------------------------|
| Journal:                        | <i>BMJ Open</i>                                                                                                                                                                                                                                                                                                                                                                                                                                                                                                                                                                                                                                                                                                                                                                                                    |
| Manuscript ID                   | bmjopen-2018-026200.R2                                                                                                                                                                                                                                                                                                                                                                                                                                                                                                                                                                                                                                                                                                                                                                                             |
| Article Type:                   | Research                                                                                                                                                                                                                                                                                                                                                                                                                                                                                                                                                                                                                                                                                                                                                                                                           |
| Date Submitted by the Author:   | 18-Mar-2019                                                                                                                                                                                                                                                                                                                                                                                                                                                                                                                                                                                                                                                                                                                                                                                                        |
| Complete List of Authors:       | Chrusciel, Jan; Centre Hospitalier de Troyes, Department of Medical Information and Performance Evaluation; University Hospitals of Reims, Department of Research and Public Health<br>Fontaine, Xavier; Manchester Hospital, Emergency Department<br>Devillard, Arnaud; Centre Hospitalier de Troyes, Emergency Department<br>Cordonnier, Aurélien; Manchester Hospital, Department of Medical Information<br>Kanagaratnam, Lukshe; University Hospitals of Reims, Department of Research and Public Health; Université de Reims Champagne-Ardenne, Faculty of Medicine, EA 3797<br>Laplanche, David; Centre Hospitalier de Troyes, Department of Medical Information and Performance Evaluation<br>Sanchez, Stéphane; Centre Hospitalier de Troyes, Department of Medical Information and Performance Evaluation |
| <b>Primary Subject Heading</b>: | Emergency medicine                                                                                                                                                                                                                                                                                                                                                                                                                                                                                                                                                                                                                                                                                                                                                                                                 |
| Secondary Subject Heading:      | Public health                                                                                                                                                                                                                                                                                                                                                                                                                                                                                                                                                                                                                                                                                                                                                                                                      |
| Keywords:                       | Emergency Department, Length of stay, Fast-track, Hospital readmissions, Healthcare Quality                                                                                                                                                                                                                                                                                                                                                                                                                                                                                                                                                                                                                                                                                                                        |
|                                 |                                                                                                                                                                                                                                                                                                                                                                                                                                                                                                                                                                                                                                                                                                                                                                                                                    |

SCHOLARONE™  
Manuscripts

# The impact of the implementation of a fast-track on emergency department length of stay and quality of care indicators in the Champagne-Ardenne region: a difference-in-differences study

Jan Chrusciel<sup>1,5</sup>, Xavier Fontaine<sup>2</sup>, Arnaud Devillard<sup>3</sup>, Aurélien Cordonnier<sup>4</sup>, Lukshe Kanagaratnam<sup>5,6</sup>, David Laplanche<sup>1</sup>, Stéphane Sanchez<sup>1</sup>

<sup>1</sup>Department of Medical Information and Performance Evaluation, Centre Hospitalier de Troyes, Troyes, France; <sup>2</sup>Emergency Department, Manchester Hospital, Charleville-Mézières, France; <sup>3</sup>Emergency Department, Centre Hospitalier de Troyes, Troyes, France; <sup>4</sup>Medical Information Department, Manchester Hospital, Charleville-Mézières, France. <sup>5</sup>Department of Research and Public Health, University Hospitals of Reims, Reims, France; <sup>6</sup>Faculty of Medicine, EA 3797, University of Reims Champagne-Ardenne, Reims, France

## Abstract

**Objectives:** We aimed to evaluate the effect of the implementation of a fast-track on Emergency Department (ED) length of stay (LOS) and quality of care indicators.

**Design:** Difference-in-differences analysis.

**Setting:** Two large hospitals in the Champagne-Ardenne region, France.

**Participants:** Patients admitted to the emergency department between 13 January 2015 and 13 January 2017.

**Intervention:** Implementation of a fast-track for patients with small injuries or benign medical conditions (13 January 2016).

**Primary and Secondary Outcome Measures:** Proportion of patients with LOS  $\geq$  4h and proportion of access block situations (when patients cannot access an appropriate hospital bed within 8 hours). 7-day readmissions and 30-days readmissions.

**Results:** The emergency department of the intervention hospital registered 53768 stays in 2016 and 57965 in 2017 (+7.8%). During the same period, the control hospital registered 42133 and 43696 stays respectively (+3.7%). In the intervention hospital, the mean length of stay was 261 minutes before the intervention and 248 minutes after the intervention. In the control hospital, the corresponding times were 262 and 265 minutes. The difference-in-differences (DID) estimator for ED LOS  $\geq$  4h was 0.80; 95% confidence interval (CI) 0.76 – 0.84). The DID estimator for access block was 1.12; 95% CI 1.03 – 1.22.

There was an increase in the proportion of 30-day readmissions in the intervention hospital (from 11.4% to 12.3%). An increase was also observed in the control group (from 12.0% to 12.6%). In the intervention hospital, after the intervention, the proportion of patients leaving without being seen by a physician decreased from 10.0% to 5.4%.

**Conclusions:** The implementation of a fast-track was associated with a decrease in stays lasting  $\geq$ 4 hours without a decrease in access block. Further studies are needed to evaluate the causes of variability in emergency department LOS and their connections to quality of care indicators.

Correspondence to: Jan Chrusciel, Department of Medical Information and Performance Evaluation, Centre Hospitalier de Troyes, 101 Avenue Anatole France, 10003 Troyes, France.

Tel: +33 (0) 3 26 78 77 63. Fax: + 33 (0) 3 25 49 49 50. E-mail: [jan.chrusciel.md@gmail.com](mailto:jan.chrusciel.md@gmail.com)

## Keywords

Emergency Department – Length of stay – Fast-track – Hospital readmissions – Healthcare Quality

### Strengths and Limitations of this study

- We measured the effect of the implementation of a fast-track on length of stay and quality of care indicators
- Regional trends were controlled for using a difference-in-differences approach
- The intervention was the only major change in the intervention hospital. No structural changes took place in the control hospital during the study period
- Further studies could include more hospitals

### Introduction

The number of annual emergency department (ED) visits has doubled between 1980 and 2004 in France [1], and is still rising (+3.7% between 2014 and 2015). This phenomenon has been observed in most developed countries [2], and is a challenge for physicians and policymakers. ED crowding was defined by the American College of Emergency Physicians (ACEP) as a mismatch between the need for emergency care and the emergency department's ability to provide this care [3]. ED crowding has been associated with longer ED length of stay (LOS) [4], inadequate pain management [5], and worse patient outcomes [6]. A crowded emergency department may sometimes need to fall back on ambulance diversion, redirecting patients to nearby hospitals. Finding the best organization for EDs is therefore a public health priority with ethical implications [3]. The causes of ED crowding include increased demand from patients, epidemics, lack of trained staff, and lack of hospital beds [7]. Numerous scores have been proposed to measure ED crowding (EDWIN, NEDOCS, READI, Work Score) however their predictive power typically does not outperform simpler indicators such as bed occupancy [8,9]. Time series analysis can predict emergency department activity with a Relative Mean Absolute Performance (RMAP) of 90% [10]. A

1  
2  
3 shorter length of stay results in less complications [11,12], higher odds of survival for severe  
4 patients [13], increased patient satisfaction [14,15], and lower healthcare spending [16]. The  
5 optimization of patient flow has been studied extensively [17,18]. Numerous strategies have  
6 been proposed to regulate patient flow in the emergency department : Care Coordination  
7 Teams, whose mission involves orienting older patients towards appropriate healthcare,  
8 observation units (caring for patients up to 72h), chest pain units, home-based healthcare  
9 [19]. A common strategy is the use of fast-tracks, dedicated pathways aimed towards the  
10 fast delivery of healthcare for patients with benign medical conditions scheduled for rapid  
11 discharge. Fast-tracks have been implemented in small and larger hospitals [20]. In 2002,  
12 58% of 17 surveyed Australian public hospitals functioned with a fast-track [19]. A Monte-  
13 Carlo simulation showed that implementing a fast-track with a dedicated nurse could  
14 shorten median waiting times up to 35% [21]. Previous studies have evaluated the effect of  
15 implementing a fast-track [22–25], however the length of these studies was short, typically  
16 less than 6 months. One 2-year study with a fast-track staffed with mid-level providers did  
17 not adjust for patient severity or regional trends [26]. The aim of this study was to assess  
18 the impact of an emergency department restructuring with the implementation of a fast-  
19 track on ED length of stay in the setting of a large hospital in France. Secondary objectives  
20 were to study predictors of ED LOS, and to assess the effect of the emergency department  
21 restructuring on 7-day readmissions, 30-day readmissions, and the proportion of patients  
22 leaving without being seen.  
23  
24  
25  
26  
27  
28  
29  
30  
31  
32  
33  
34  
35  
36  
37  
38  
39  
40  
41  
42  
43  
44  
45  
46  
47  
48  
49  
50

## 51 52 53 54 **Methods**

55  
56  
57 We conducted a difference-in-differences analysis [27,28]. This method is classically used in  
58 economics [29] and involves a control group to attempt to model the counterfactual: what  
59  
60

1  
2  
3 would have happened if the intervention group had continued evolving with a common  
4  
5 trend with the control group before the intervention.  
6  
7  
8  
9

## 10 **Population**

11  
12 The region in which the study took place is one of the least densely populated regions in  
13  
14 France. The age structure of the region resembles the pooled age structure of the rest of the  
15  
16 country. The intervention hospital (Troyes Hospital) was a large hospital with 442 medical  
17  
18 beds, 127 surgical beds and 63 beds dedicated to gynaecology and obstetrics, serving an  
19  
20 area of approximately 40 kilometres radius (25 miles). The emergency department hosted  
21  
22 an observation unit. The control hospital (Manchester Hospital, located in Charleville-  
23  
24 Mézières) was in the same region, and had 375 medical bed, 101 surgical beds, and 63 beds  
25  
26 for gynaecology and obstetrics.  
27  
28  
29  
30  
31  
32  
33  
34

## 35 **Patient and Public involvement**

36  
37 Patients were not involved in the design or analysis of this study.  
38  
39  
40  
41

## 42 **Intervention**

43  
44 The intervention included an extension of the ED from 15 to 27 consultation rooms and the  
45  
46 opening of a fast-track for patients with small injuries or benign medical conditions. The  
47  
48 fast-track in the intervention hospital had 6 rooms. The fast-track is a healthcare pathway  
49  
50 for the assessment and treatment of low severity patients, situated in a dedicated area of  
51  
52 the emergency department. The intervention was implemented on 13 January 2016. Two ED  
53  
54 physicians managed adult patients and paediatric traumatology in the fast-track. When ED  
55  
56 physicians were not available, they were replaced by residents. Gynaecology and psychiatry  
57  
58  
59  
60



patients could also be managed in dedicated areas of the fast-track. Entry criteria for the fast-track were pre-defined in a protocol (Supplementary Appendix 1).

## Outcomes

The main outcome was an emergency department length of stay  $\geq 4$  hours [30,31]. LOS was defined as the time elapsed between registration in the ED to the time the patient leaves the ED. The secondary outcome was access block, defined by the Australasian College for Emergency Medicine as the situation where patients who need hospital care cannot access an appropriate hospital bed within a reasonable delay (8 hours) [32]. We used the Patient State (PS) classification [10] presented in Table 1 to identify patients that needed to be admitted to the hospital (PS 3, 4, 5, 6 and 7). Time to physician appraisal and LOS were extracted from local hospital databases (data extracted from Resurgences© in the intervention hospital and Urqual© in the control hospital). Other quality of care indicators included the number of patients leaving without being seen [33] and the monthly proportion of 30-day and 7-day readmissions [34].

**Table 1:** Patient State (PS) classification for patients admitted to the emergency department

| PS class | Description                                                                   |
|----------|-------------------------------------------------------------------------------|
| PS1      | Patient with moderate treatment, discharged from emergency department         |
| PS2      | Patient with major treatment, discharged from emergency department            |
| PS3      | Patient with moderate treatment, hospitalized after emergency department stay |
| PS4      | Patient with major treatment, hospitalized after emergency department stay    |
| PS5      | Patients requiring immediate treatment, not elsewhere classified              |
| PS6      | Patients requiring immediate intensive care/resuscitation                     |
| PS7      | Died in emergency Department                                                  |

## Statistical methods

1  
2  
3 Continuous variables were summarized with means and standard deviations. Categorical  
4 variables were presented with absolute frequencies and proportions. A descriptive analysis  
5  
6 variables were presented with absolute frequencies and proportions. A descriptive analysis  
7  
8 was carried out for LOS by period and by location. Differences between the period before  
9  
10 the intervention and the period after the intervention were compared with Student's *t* test  
11  
12 after verifying for each group that the sample size was sufficient for the application of the  
13  
14 Central Limit Theorem, and with the  $\chi^2$  test for categorical variables. Summary statistics  
15  
16 were provided for the waiting times of patients with selected diagnoses (pneumonia, stroke,  
17  
18 myocardial infarction and heart failure). To facilitate modelling, length of stay was  
19  
20 transformed into a binary variable using thresholds classically found in the literature [31].  
21  
22 Separate models were fitted to study the primary outcome and access block. The effect of  
23  
24 the intervention on the primary outcome was evaluated for all patients. The effect of the  
25  
26 intervention on access block was evaluated in an analysis restricted to patients who needed  
27  
28 to be hospitalized after their emergency department stay. Multiple logistic regression  
29  
30 models were estimated with Generalized Estimating Equations [35] to account for the  
31  
32 within-patient correlation in LOS. The difference-in-difference estimate was modelled as the  
33  
34 coefficient of the interaction between time (before or after the intervention) and location.  
35  
36 The indicator variable for calculating the difference-in-difference estimate was coded 1 in  
37  
38 the "post" period for the intervention hospital, and 0 otherwise. The model was  $\text{Logit}(p) = \alpha$   
39  
40  $+ \pi P + \gamma L + \delta D + T'\tau + X'\beta$ , with *p* being the probability of the outcome,  $\alpha$  the intercept, *P* an  
41  
42 indicator variable for period, *L* an indicator variable for location, *D* the interaction between  
43  
44 period and location (difference-in-differences indicator), *T* a vector of additional time  
45  
46 variables (effect of being admitted during the night, the weekend or winter months) and *X* a  
47  
48 vector of individual-level covariates. Age was grouped in categories relevant to clinical  
49  
50 practice. Primary diagnosis was defined using chapters of the International Classification of  
51  
52  
53  
54  
55  
56  
57  
58  
59  
60

1  
2  
3 Disease (10<sup>th</sup> revision) to avoid problems in estimation due to sparse data. Patient severity  
4 was included in the model using the PS classification [10]. If one of the components of the  
5 PS classification was missing, PS was imputed to the most likely category based on available  
6 data in the classification (11.9% of cases). Time variables included indicator variables for  
7 admission during the night (22:00 – 06:00), and during weekends (Saturday and Sunday). An  
8 indicator variable for December and January, where flu epidemics often occur, was included  
9 in the model. The study sample was a convenience sample with a time window constructed  
10 symmetrically around the intervention, allowing to control for seasonal effects. Statistical  
11 analyses were performed using SAS software version 9.4 (The SAS Institute Inc., Cary, NC,  
12 USA). Data management and figures were realised using R version 3.3.4 [36].  
13  
14  
15  
16  
17  
18  
19  
20  
21  
22  
23  
24  
25  
26  
27  
28  
29

### 30 **Ethics Statement**

31 All legal requirements for epidemiological studies were respected, and the French national  
32 commission governing the application of data privacy laws issued an approval for the  
33 project. Since the study was strictly observational, in accordance with the laws that regulate  
34 “non-interventional clinical research” in France, namely articles L.1121-1 and R.1121-2 of  
35 the Public Health Code, it did not require a written informed consent from participants or  
36 approval from an ethics committee.  
37  
38  
39  
40  
41  
42  
43  
44  
45  
46  
47  
48  
49

### 50 **Results**

51 Between 13 January 2015 and 13 January 2017, 111733 ED stays were registered in the  
52 intervention hospital, and 85829 in the control hospital (Figure 1).  
53  
54  
55  
56  
57  
58  
59  
60

### **Figure 1** Flowchart

1  
2  
3  
4  
5  
6 The Emergency department of the intervention hospital registered 53768 stays in 2016 and  
7  
8 57965 in 2017 (+7.8%). During the same period, the control hospital registered 42133 and  
9  
10 43696 admissions respectively (+3.7%). Regarding human resources, in the intervention  
11  
12 hospital, physicians increased from 11.5 to 14.5 Full-Time Equivalents (FTE), nurses from  
13  
14 35.3 to 36.8 FTE, and assistant nurses from 16.8 to 19.5 FTE. Mean age was higher in the  
15  
16 control hospital (Table 2). The mean length of stay in the intervention hospital ED was 261  
17  
18 min (Standard Deviation 213) before the intervention and 248 min (SD 217) after the  
19  
20 intervention. In the control group, the mean length of stay before the intervention was 262  
21  
22 min (SD 392) and 265 min (SD 393) after the intervention. In the intervention hospital, the  
23  
24 proportion of patients with LOS < 4 hours changed from 55.2% to 60.6%. The proportion of  
25  
26 patients with LOS < 4 hours was stable in the control group. Within the subgroups of  
27  
28 patients subsequently admitted to the intervention hospital, patients consulting for  
29  
30 pneumonia had a decrease in mean time to physician assessment after the intervention:  
31  
32 from 128 min (SD 122.5) to 123 min (SD 123.9). Stroke patients also had decreased waiting  
33  
34 times: from 108 (SD 111) to 90 (SD 89) minutes. The time to physician assessment remained  
35  
36 unchanged for patients consulting for myocardial infarction and heart failure: from 110 (SD  
37  
38 115) before the intervention to 109 (SD 114) minutes after the intervention.  
39  
40  
41  
42  
43  
44  
45  
46  
47  
48  
49  
50  
51  
52  
53  
54  
55  
56  
57  
58  
59  
60

**Table 2: Demographic characteristics of study population, length of stay and readmissions in the intervention and control hospitals**

| Intervention | P-value | Control | P-value |
|--------------|---------|---------|---------|
|--------------|---------|---------|---------|

|                                                                                | 2015-2016*            | 2016-2017†            |         | 2015-2016*            | 2016-2017†            |         |
|--------------------------------------------------------------------------------|-----------------------|-----------------------|---------|-----------------------|-----------------------|---------|
|                                                                                | mean (SD) or<br>n (%) | mean (SD) or<br>n (%) |         | mean (SD) or<br>n (%) | mean (SD) or<br>n (%) |         |
| <i>n</i>                                                                       | 53768                 | 57965                 | -       | 42133                 | 43696                 | -       |
| Age (years): mean (SD)                                                         | 40.4 (27.3)           | 39.8 (27.4)           | <0.001‡ | 45.4 (25.3)           | 45.4 (25.2)           | 0.81‡   |
| Sex: female – <i>n</i> (%)                                                     | 26712 (49.7)          | 29235 (50.4)          | 0.001§  | 20171 (47.9)          | 21338 (48.8)          | 0.005§  |
| Length of stay (min):<br>mean (SD)                                             | 260.67<br>(212.65)    | 248.36<br>(216.96)    | <0.001‡ | 262.78<br>(392.34)    | 265.04<br>(392.48)    | 0.40‡   |
| 7-day readmissions: <i>n</i><br>(%)                                            | 3177 (5.9)            | 3642 (6.3)            | 0.01§   | 2600 (6.2)            | 2689 (6.2)            | 0.92§   |
| 30-day readmissions: <i>n</i><br>(%)                                           | 6105 (11.4)           | 7129 (12.3)           | <0.001§ | 5048 (12.0)           | 5489 (12.6)           | 0.01§   |
| Patients admitted to<br>hospital after<br>emergency department:<br><i>n</i>    | 14795                 | 14864                 | -       | 7530                  | 7592                  | -       |
| Length of stay (min):<br>mean (SD)                                             | 342 (221)             | 367 (251)             | <0.001‡ | 536 (532)             | 566 (554)             | <0.001‡ |
| Patients not admitted to<br>hospital after<br>emergency department<br><i>n</i> | 38971                 | 43100                 | -       | 34603                 | 36104                 | -       |
| Length of stay (min):<br>mean (SD)                                             | 230 (201)             | 208 (188)             | <0.001‡ | 203 (325)             | 201 (314)             | 0.51‡   |

SD: Standard Deviation. ICD-10: International Classification of Disease, 10<sup>th</sup> revision.

\* 13/01/2015 to morning of 13/01/2016. † 13/01/2016 afternoon to 13/01/2017. ‡ Student's *t* test. §  $\chi^2$  test

The exponentiated difference-in-differences estimate was 0.798 (95% CI 0.762 - 0.836,  $p < 0.0001$ ), therefore the intervention successfully reduced the number of ED stays with LOS  $\geq 4$  hours (Table 3). This coefficient can be interpreted as a ratio of odds ratios. However, the estimate for access block was 1.121 (95% CI 1.029 - 1.222,  $p = 0.009$ ): the intervention did not seem effective in helping the patients who needed it to access an appropriate hospital bed in a reasonable amount of time ( $< 8$ h). Age was linearly related with length of stay, with younger patients having a shorter LOS. Weekends were associated with a shorter LOS. Patients admitted for injuries (ICD-10 codes S00 to T98) and skin problems (L00 to L99) tended to have a short LOS, while patients admitted for neoplasms (C00 to D48) or

neurologic diseases (G00 – G99) tended to have a longer LOS. Trends in daily mean LOS are shown in Figure 2.

**Figure 2** Daily mean emergency department length of stay during the study period (trends obtained by locally weighted regression).

### Effect on quality of care indicators

Overall, 12.0% of stays were 30-day readmissions. Most readmissions (6.1%) occurred within the first seven days. There was a trend for increasing 30-day readmissions during the study period (Figure 3). Seven-day readmissions increased from 5.9% to 6.3% in the intervention group, and remained stable (6.2%) in the control group. In the intervention hospital, after the intervention, the proportion of patients leaving without being seen by a physician decreased from 10.0% to 5.4%.

**Figure 3** Proportion of emergency department 7-day and 30-day readmissions during the study period

**Table 3:** Multivariable logistic regression fitted with Generalized Estimating Equations for length of stay  $\geq$  4h and access block.

| Variable                                | Odds Ratio<br>(emergency<br>department<br>length of stay<br>$\geq$ 4 hours for<br>all patients)* | 95% Confidence<br>Interval | Odds Ratio<br>(Access block:<br>emergency<br>department length<br>of stay $\geq$ 8h for<br>hospitalized<br>patients)* | 95% Confidence<br>Interval |
|-----------------------------------------|--------------------------------------------------------------------------------------------------|----------------------------|-----------------------------------------------------------------------------------------------------------------------|----------------------------|
| Location $\times$ Period<br>interaction | 0.798                                                                                            | (0.762 - 0.836)            | 1.121                                                                                                                 | (1.029 - 1.222)            |
| Period: after intervention              | 0.967                                                                                            | (0.934 - 1.001)            | 1.097                                                                                                                 | (1.027 - 1.172)            |

|                                                                       |               |                 |               |                 |
|-----------------------------------------------------------------------|---------------|-----------------|---------------|-----------------|
| <b>(reference = before intervention)</b>                              |               |                 |               |                 |
| <b>Location: intervention hospital (reference = control hospital)</b> | 2.41          | (2.317 - 2.507) | 0.718         | (0.672 - 0.767) |
| <b>7-day readmission</b>                                              | 0.906         | (0.861 - 0.953) | 0.894         | (0.82 - 0.975)  |
| <b>Weekend day</b>                                                    | 0.896         | (0.873 - 0.919) | 0.849         | (0.808 - 0.892) |
| <b>Night</b>                                                          | 0.749         | (0.724 - 0.775) | 1.51          | (1.422 - 1.604) |
| <b>Principal Diagnosis (ICD-10 Chapter)</b>                           |               |                 |               |                 |
| <b>Injury, poisoning</b>                                              | 0.400         | (0.375 - 0.427) | 0.578         | (0.529 - 0.632) |
| <b>Diseases of the nervous system</b>                                 | 1.903         | (1.713 - 2.114) | 1.266         | (1.119 - 1.444) |
| <b>Skin and subcutaneous tissue</b>                                   | 0.418         | (0.377 - 0.463) | 0.606         | (0.483 - 0.761) |
| <b>Neoplasms</b>                                                      | 1.715         | (1.253 - 2.348) | 2.588         | (1.941 - 3.45)  |
| <b>Diseases of the circulatory system</b>                             | 1 (Reference) | -               | 1 (Reference) | -               |
| <b>Month: December and January (reference = other months)</b>         | 1.121         | (1.088 - 1.155) | 1.324         | (1.255 - 1.396) |
| <b>Severity (PS classification)</b>                                   |               |                 |               |                 |
| <b>PS1</b>                                                            | 1 (Reference) | -               | -             | -               |
| <b>PS2</b>                                                            | 0.753         | (0.725 - 0.781) | -             | -               |
| <b>PS3</b>                                                            | 2.584         | (2.5 - 2.671)   | 1 (Reference) | -               |
| <b>PS4</b>                                                            | 3.083         | (2.941 - 3.231) | 0.875         | (0.832 - 0.92)  |
| <b>PS5</b>                                                            | 1.225         | (1.064 - 1.411) | 0.783         | (0.686 - 0.894) |
| <b>PS6</b>                                                            | 0.38          | (0.307 - 0.47)  | 0.305         | (0.23 - 0.403)  |
| <b>PS7</b>                                                            | 0.436         | (0.279 - 0.682) | 0.416         | (0.251 - 0.691) |
| <b>Sex: Female (reference = male)</b>                                 | 0.972         | (0.949 - 0.996) | 1.032         | (0.988 - 1.078) |
| <b>Age (years)</b>                                                    |               |                 |               |                 |
| <b>50 - 64</b>                                                        | 1.693         | (1.635 - 1.753) | 1.340         | (1.248 - 1.438) |
| <b>65 - 74</b>                                                        | 2.279         | (2.182 - 2.38)  | 1.544         | (1.431 - 1.665) |
| <b>75 - 89</b>                                                        | 3.395         | (3.268 - 3.527) | 1.786         | (1.677 - 1.903) |
| <b>≥ 90</b>                                                           | 4.250         | (3.979 - 4.539) | 1.748         | (1.606 - 1.903) |
| <b>0 - 17</b>                                                         | 0.259         | (0.248 - 0.270) | 0.078         | (0.064 - 0.096) |
| <b>18 - 50</b>                                                        | 1 (Reference) | -               | 1 (Reference) | -               |

ICD-10: International Classification of Disease, 10<sup>th</sup> revision. PS: Patient State

\* Multivariable analysis adjusted for age, sex, time of the day (nighttime or daytime), time in the week (weekend day or weekday), time of the year (December and January or other months, admission diagnosis (grouped using ICD-10 chapters) and severity (using the PS classification).

## Discussion

Our study showed that implementing a fast-track can decrease the mean length of stay and number of stays lasting  $\geq 4$  hours in the emergency department of a large general hospital.

We did not observe a decrease in LOS for patients requiring hospitalization. However, the length of stay for severe patients may have been limited by hospital-level bed availability rather than ED-related factors [37]. Indeed, other studies have found that the implementation of a fast-track did not adversely affect LOS for patients subsequently admitted to the hospital [38].

The addition of new beds to the emergency department could explain part of our results. However, the addition of new beds does not guarantee improved access to care. In a study by Han et al., the time between ambulance diversion episodes was not significantly different after expanding an ED from 28 to 53 beds [39].

Asplin et al. consider the emergency department as a system with 3 components: *input*, *throughput*, and *output* [40]. The input component includes events, diseases or other factors that contribute to the demand for urgent care. Throughput includes triage, room placement, diagnosis and treatment. The implementation of the fast-track can accelerate throughput for patients not subsequently admitted to the hospital. The decrease in LOS can be explained by decreased crowding due to rapid patient discharge, floorplan modifications allowing faster patient transfers, or physician and nurse role adjustments [41,42]. Fast-tracks can efficiently coexist with other patient streams, such as tracks dedicated to complex ambulant patients [43]. Regarding output, the limiting factor for ED LOS is often lack of available hospital beds. Some authors have suggested that an occupancy of 85% is a suitable target to ensure that new patients are not left without beds [44]. This seems difficult to implement under current conditions. A systematic review of 220 articles



1  
2  
3 discussing strategies to prevent « access block » [32] mentions interventions to diminish the  
4 number of patients admitted to the ED and observation wards [45]. Other solutions to  
5 prevent ED crowding are: sharing optimal care processes [46], enrolling additional staff [8],  
6 or eventually redirecting patients towards other centers [7]. Causes of increased demand for  
7 urgent care include the ageing of populations, with a higher prevalence of chronic diseases,  
8 the scarcity of primary care, and changing perceptions of what is considered urgent.  
9 Solitude is a major driver of ED consultations [47]. The efficacy of gatekeeping procedures  
10 has yet to be evaluated [48]. The patients that frequently consult in the emergency  
11 department, however, are often disadvantaged by a low socio-economic status [49] and can  
12 be considered a high-risk group regarding morbidity and mortality [50]. Prior contact with  
13 the ED could help improve communication with the patient, although an effect on the  
14 number of ED admissions remains to be established [51]. Pain is a major complaint in the  
15 ED, and patients with chronic pain could be more likely to consult [52]. Access to  
16 programmed care is crucial, and patients who cannot access programmed care will come  
17 back to the emergency department. In an Australian study, around half of patients would  
18 prefer to see a general practitioner for a similar problem than to be treated in the  
19 emergency fast-track [53]. In this regard, what is happening in emergency departments can  
20 be seen as a mirror of the dysfunctions in a healthcare system [54].

21  
22  
23  
24  
25  
26  
27  
28  
29  
30  
31  
32  
33  
34  
35  
36  
37  
38  
39  
40  
41  
42  
43  
44  
45  
46  
47 After the implementation of the fast-track, the number of patients registered in the ED  
48 increased by 7.8%. This increase was higher than in the control group. This is unlikely to be a  
49 fluctuation in epidemiological trends, but rather reflects an increased demand generated by  
50 an easier access to timely care. Patients leaving without being seen diminished from 10.0%  
51 to 5.4%, similar to the proportions in studies by Combs et al [55] and Sanchez et al. [26].  
52  
53  
54  
55  
56  
57  
58  
59  
60

1  
2  
3 Among other quality of care indicators, we evaluated emergency department 7 and 30-day  
4 readmissions [56]. The main rationale for including these indicators was to appreciate the  
5 extent by which the decrease in LOS was explained by readmissions of the same patients.  
6  
7  
8  
9  
10 Seven-day readmissions increased in the intervention hospital after the implementation of  
11 the fast-track. Patients coming back to the hospital within 7 days had shorter lengths of stay  
12 during the readmission. One possible explanation is the availability of the patient's recent  
13 history, making medical assessment simpler. Emergency departments may have a role to  
14 play in preventing hospital readmissions [57]. However, recent studies show that hospital  
15 readmissions are often not avoidable, and are largely influenced by factors on which  
16 hospitals have no control, like socio-economic status [34,58]. As is often the case, these  
17 indicators need to be appraised in conjunction with other quality of care indicators.

18  
19  
20  
21  
22  
23  
24  
25  
26  
27  
28  
29  
30 We were able to control for regional trends with the inclusion of a control hospital. The  
31 intervention that took place in the intervention group was the only major change in the  
32 emergency department during this period. The control hospital did not undergo structural  
33 changes during the study period. The major limitation of our study was that the effect of  
34 implementing a fast-track was confounded with the addition of staff and new beds to the ED  
35 to allow it to function effectively under increased constraints. However, the reported  
36 increase in full-time equivalents was due to the administrative transfer of staff from the  
37 mobile unit for emergencies and intensive care. Only one additional nurse was fully  
38 allocated to the ED. As the mobile unit's main activity is to intervene outside of the hospital,  
39 it is unlikely that the changes in length of stay observed in the intervention hospital were  
40 entirely explained by the increase in human resources. Moreover, because supplemental  
41 beds were added to the ED as part of the intervention, the ratio of staff to beds decreased.  
42  
43  
44  
45  
46  
47  
48  
49  
50  
51  
52  
53  
54  
55  
56  
57  
58  
59  
60 Another limitation was that the time intervals were evaluated using data from local

1  
2  
3 emergency department information systems. A simple imputation was carried out for one of  
4  
5 the variables (the PS classification), using the most likely result based on available scores if a  
6  
7 component of the classification was missing. However, the risk of misclassification was  
8  
9 minimal, as the incomplete scores were sufficient to decide if the patient required  
10  
11 hospitalization in all cases. We could not carry out multiple imputation because of the size  
12  
13 of the data. There could have been discrepancies between hospitals in encoding admission  
14  
15 and discharge times. However, it seems unlikely that this could change the results of the  
16  
17 study. The difference-in-differences method is based on a hypothesis that intervention and  
18  
19 control hospitals share common trends before the study period. The control hospital was  
20  
21 included because it was in the same region and was of the same size as the intervention  
22  
23 hospital, however there were differences regarding the functioning of their emergency  
24  
25 departments. Stays in the intervention hospital were more likely to last  $\geq 4$  hours than in the  
26  
27 control hospital as is shown by the location-specific Odds Ratios. The common shocks  
28  
29 condition is violated during peak days in either one of the hospitals. However, the aim of the  
30  
31 difference-in-differences analysis was to demonstrate that no major changes affected the  
32  
33 region, as was demonstrated by the stability of the number of patients and length of stay in  
34  
35 the control hospital. To conclude, our study showed an increase in short stays for low acuity  
36  
37 patients following the implementation of the fast-track. In this regard, the fast-track  
38  
39 consolidated the emergency department's role of compensating deficiencies in access to  
40  
41 primary care, without favourably impacting length of stay for severe patients. Hospital-level  
42  
43 bed availability is critical to ensure efficient healthcare for patients registered to the ED.  
44  
45 Studies including more hospitals and a larger array of quality of care indicators are  
46  
47 warranted to estimate the effect of implementing a fast-track on emergency department  
48  
49 performance and population health outcomes.  
50  
51  
52  
53  
54  
55  
56  
57  
58  
59  
60

1  
2  
3  
4  
5  
6 **Funding statement:** This research received no specific grant from any funding agency in the  
7  
8 public, commercial or not-for-profit sectors.  
9

10  
11 **Competing interests statement:** All authors have no competing interests to declare.  
12

13 **Author contributions:** JC, DL, AD, LK and SS designed the study. SS, DL, XF, AC contributed to  
14 the acquisition of data. JC conducted the statistical analysis. JC, XF, AD, AC, DL, LK and SS  
15 contributed to drafting the article or revising it critically for important intellectual content.  
16  
17 All authors read and approved the final manuscript.  
18  
19

20  
21  
22 **Acknowledgements:** We would like to thank Mohamed Afilal and Priscilla De Souza for their  
23 contributions in data extraction.  
24  
25

26  
27 **Data sharing statement:** To prevent dissemination of sensitive patient data, the dataset on  
28 which this study was based was not made available to the public. Deidentified data can be  
29 obtained from the corresponding author upon reasonable request - ORCID ID 0000-0002-  
30  
31 8364-6506.  
32  
33

34  
35  
36  
37 **STROBE Checklist:** STROBE Checklist is provided as a Supplementary Material  
38  
39  
40  
41  
42  
43  
44  
45  
46

## 47 **References**

- 48  
49 1 Cour des comptes. Les urgences médicales : constats et évolution récente. In: *Rapport*  
50 *public annuel 2007*. Paris: : Cour des comptes 2007. 1.  
51
- 52  
53 2 Pines JM, Hilton JA, Weber EJ, *et al*. International perspectives on emergency  
54 department crowding. *Acad Emerg Med Off J Soc Acad Emerg Med* 2011;**18**:1358–70.  
55 doi:10.1111/j.1553-2712.2011.01235.x  
56
- 57  
58 3 Moskop JC, Sklar DP, Geiderman JM, *et al*. Emergency Department Crowding, Part 1—  
59 Concept, Causes, and Moral Consequences. *Ann Emerg Med* 2009;**53**:605–11.  
60 doi:10.1016/j.annemergmed.2008.09.019

- 1
- 2
- 3
- 4 4 Chiu I-M, Lin Y-R, Syue Y-J, *et al.* The influence of crowding on clinical practice in the  
5 emergency department. *Am J Emerg Med* Published Online First: 4 July 2017.  
6 doi:10.1016/j.ajem.2017.07.011
- 7
- 8 5 Hwang U, Richardson LD, Sonuyi TO, *et al.* The effect of emergency department  
9 crowding on the management of pain in older adults with hip fracture. *J Am Geriatr Soc*  
10 2006;**54**:270–5. doi:10.1111/j.1532-5415.2005.00587.x
- 11
- 12 6 Sprivulis PC, Da Silva J-A, Jacobs IG, *et al.* The association between hospital  
13 overcrowding and mortality among patients admitted via Western Australian  
14 emergency departments. *Med J Aust* 2006;**184**:208–12.
- 15
- 16
- 17 7 Hoot NR, Aronsky D. Systematic review of emergency department crowding: causes,  
18 effects, and solutions. *Ann Emerg Med* 2008;**52**:126–36.  
19 doi:10.1016/j.annemergmed.2008.03.014
- 20
- 21
- 22 8 Hoot NR, Zhou C, Jones I, *et al.* Measuring and forecasting emergency department  
23 crowding in real time. *Ann Emerg Med* 2007;**49**:747–55.  
24 doi:10.1016/j.annemergmed.2007.01.017
- 25
- 26
- 27 9 Hoot N, Aronsky D. An Early Warning System for Overcrowding in the Emergency  
28 Department. *AMIA Annu Symp Proc* 2006;**2006**:339–43.
- 29
- 30 10 Afilal M, Yalaoui F, Dugardin F, *et al.* Forecasting the Emergency Department Patients  
31 Flow. *J Med Syst* 2016;**40**:175. doi:10.1007/s10916-016-0527-0
- 32
- 33 11 Carr BG, Kaye AJ, Wiebe DJ, *et al.* Emergency department length of stay: a major risk  
34 factor for pneumonia in intubated blunt trauma patients. *J Trauma* 2007;**63**:9–12.  
35 doi:10.1097/TA.0b013e31805d8f6b
- 36
- 37
- 38 12 Diercks DB, Roe MT, Chen AY, *et al.* Prolonged emergency department stays of non-ST-  
39 segment-elevation myocardial infarction patients are associated with worse adherence  
40 to the American College of Cardiology/American Heart Association guidelines for  
41 management and increased adverse events. *Ann Emerg Med* 2007;**50**:489–96.  
42 doi:10.1016/j.annemergmed.2007.03.033
- 43
- 44
- 45 13 Chalfin DB, Trzeciak S, Likourezos A, *et al.* Impact of delayed transfer of critically ill  
46 patients from the emergency department to the intensive care unit. *Crit Care Med*  
47 2007;**35**:1477–83. doi:10.1097/01.CCM.0000266585.74905.5A
- 48
- 49
- 50 14 Bernstein SL, Aronsky D, Duseja R, *et al.* The effect of emergency department crowding  
51 on clinically oriented outcomes. *Acad Emerg Med Off J Soc Acad Emerg Med* 2009;**16**:1–  
52 10. doi:10.1111/j.1553-2712.2008.00295.x
- 53
- 54 15 Guttman A, Schull MJ, Vermeulen MJ, *et al.* Association between waiting times and  
55 short term mortality and hospital admission after departure from emergency  
56 department: population based cohort study from Ontario, Canada. *BMJ*  
57 2011;**342**:d2983. doi:10.1136/bmj.d2983
- 58
- 59
- 60

- 16 Bayley MD, Schwartz JS, Shofer FS, *et al.* The financial burden of emergency department congestion and hospital crowding for chest pain patients awaiting admission. *Ann Emerg Med* 2005;**45**:110–7. doi:10.1016/j.annemergmed.2004.09.010
- 17 Jarvis PRE. Improving emergency department patient flow. *Clin Exp Emerg Med* 2016;**3**:63–8. doi:10.15441/ceem.16.127
- 18 Le Spégnane D, Cauterman M. *Rapport de fin de mission « Temps d'attente et de passage aux Urgences ». Juillet 2003 – mars 2005.* Paris: : Mission Nationale d'Expertise et d'Audit Hospitaliers 2005.
- 19 McD Taylor D, Bennett DM, Cameron PA. A paradigm shift in the nature of care provision in emergency departments. *Emerg Med J EMJ* 2004;**21**:681–4. doi:10.1136/emj.2004.017640
- 20 Kilic YA, Agalar FA, Kunt M, *et al.* Prospective, double-blind, comparative fast-tracking trial in an academic emergency department during a period of limited resources. *Eur J Emerg Med Off J Eur Soc Emerg Med* 1998;**5**:403–6.
- 21 Fitzgerald K, Pelletier L, Reznek MA. A Queue-Based Monte Carlo Analysis to Support Decision Making for Implementation of an Emergency Department Fast Track. *J Healthc Eng* 2017;**2017**:1–8. doi:10.1155/2017/6536523
- 22 Cooke M, Wilson S, Pearson S. The effect of a separate stream for minor injuries on accident and emergency department waiting times. *Emerg Med J EMJ* 2002;**19**:28–30. doi:10.1136/emj.19.1.28
- 23 Rogers T, Ross N, Spooner D. Evaluation of a 'see and treat' pilot study introduced to an emergency department. *Accid Emerg Nurs* 2004;**12**:24–7. doi:10.1016/j.aaen.2003.08.005
- 24 Ardagh MW, Wells JE, Cooper K, *et al.* Effect of a rapid assessment clinic on the waiting time to be seen by a doctor and the time spent in the department, for patients presenting to an urban emergency department: a controlled prospective trial. *N Z Med J* 2002;**115**:U28.
- 25 Kwa P, Blake D. Fast track: has it changed patient care in the emergency department? *Emerg Med Australas EMA* 2008;**20**:10–5. doi:10.1111/j.1742-6723.2007.01021.x
- 26 Sanchez M, Smally AJ, Grant RJ, *et al.* Effects of a fast-track area on emergency department performance. *J Emerg Med* 2006;**31**:117–20. doi:10.1016/j.jemermed.2005.08.019
- 27 Dimick JB, Ryan AM. Methods for evaluating changes in health care policy: the difference-in-differences approach. *JAMA* 2014;**312**:2401–2. doi:10.1001/jama.2014.16153

- 1  
2  
3  
4  
5  
6  
7  
8  
9  
10  
11  
12  
13  
14  
15  
16  
17  
18  
19  
20  
21  
22  
23  
24  
25  
26  
27  
28  
29  
30  
31  
32  
33  
34  
35  
36  
37  
38  
39  
40  
41  
42  
43  
44  
45  
46  
47  
48  
49  
50  
51  
52  
53  
54  
55  
56  
57  
58  
59  
60
- 28 Tung Y-C, Chang H-Y, Chang G-M. Impact of bundled payments on hip fracture outcomes: a nationwide population-based study. *Int J Qual Health Care J Int Soc Qual Health Care* 2018;**30**:23–31. doi:10.1093/intqhc/mzx158
- 29 Rajaram R, Chung JW, Jones AT, *et al.* Association of the 2011 ACGME Resident Duty Hour Reform With General Surgery Patient Outcomes and With Resident Examination Performance. *JAMA* 2014;**312**:2374–84. doi:10.1001/jama.2014.15277
- 30 Gill SD, Lane SE, Sheridan M, *et al.* Why do “fast track” patients stay more than four hours in the emergency department? An investigation of factors that predict length of stay. *Emerg Med Australas EMA* Published Online First: 23 March 2018. doi:10.1111/1742-6723.12964
- 31 Khanna S, Boyle J, Good N, *et al.* New emergency department quality measure: from access block to National Emergency Access Target compliance. *Emerg Med Australas EMA* 2013;**25**:565–72. doi:10.1111/1742-6723.12139
- 32 Forero R, McCarthy S, Hillman K. Access block and emergency department overcrowding. *Crit Care* 2011;**15**:216. doi:10.1186/cc9998
- 33 Broccoli MC, Moresky R, Dixon J, *et al.* Defining quality indicators for emergency care delivery: findings of an expert consensus process by emergency care practitioners in Africa. *BMJ Glob Health* 2018;**3**:e000479. doi:10.1136/bmjgh-2017-000479
- 34 Graham KL, Auerbach AD, Schnipper JL, *et al.* Preventability of Early Versus Late Hospital Readmissions in a National Cohort of General Medicine Patients. *Ann Intern Med* 2018;**168**:766–74. doi:10.7326/M17-1724
- 35 Zeger SL, Liang K-Y. Longitudinal Data Analysis for Discrete and Continuous Outcomes. *Biometrics* 1986;**42**:121–30. doi:10.2307/2531248
- 36 R Core Team (2016). R: A language and environment for statistical computing. R Foundation for Statistical Computing, Vienna, Austria. URL <https://www.R-project.org/>.
- 37 Powell ES, Khare RK, Venkatesh AK, *et al.* The relationship between inpatient discharge timing and emergency department boarding. *J Emerg Med* 2012;**42**:186–96. doi:10.1016/j.jemermed.2010.06.028
- 38 Considine J, Kropman M, Kelly E, *et al.* Effect of emergency department fast track on emergency department length of stay: a case-control study. *Emerg Med J EMJ* 2008;**25**:815–9. doi:10.1136/emj.2008.057919
- 39 Han JH, Zhou C, France DJ, *et al.* The effect of emergency department expansion on emergency department overcrowding. *Acad Emerg Med Off J Soc Acad Emerg Med* 2007;**14**:338–43. doi:10.1197/j.aem.2006.12.005
- 40 Asplin BR, Magid DJ, Rhodes KV, *et al.* A conceptual model of emergency department crowding. *Ann Emerg Med* 2003;**42**:173–80. doi:10.1067/mem.2003.302



- 1  
2  
3  
4  
5  
6  
7  
8  
9  
10  
11  
12  
13  
14  
15  
16  
17  
18  
19  
20  
21  
22  
23  
24  
25  
26  
27  
28  
29  
30  
31  
32  
33  
34  
35  
36  
37  
38  
39  
40  
41  
42  
43  
44  
45  
46  
47  
48  
49  
50  
51  
52  
53  
54  
55  
56  
57  
58  
59  
60
- 41 Walley P. Designing the accident and emergency system: lessons from manufacturing. *Emerg Med J EMJ* 2003;**20**:126–30.
  - 42 Kaushal A, Zhao Y, Peng Q, *et al*. Evaluation of fast track strategies using agent-based simulation modeling to reduce waiting time in a hospital emergency department. *Socioecon Plann Sci* 2015;**50**:18–31. doi:10.1016/j.seps.2015.02.002
  - 43 Grouse AI, Bishop RO, Gerlach L, *et al*. A stream for complex, ambulant patients reduces crowding in an emergency department. *Emerg Med Australas EMA* 2014;**26**:164–9. doi:10.1111/1742-6723.12204
  - 44 Cameron PA, Joseph AP, McCarthy SM. Access block can be managed. *Med J Aust* 2009;**190**:364–8.
  - 45 Kelen GD, Scheulen JJ, Hill PM. Effect of an emergency department (ED) managed acute care unit on ED overcrowding and emergency medical services diversion. *Acad Emerg Med Off J Soc Acad Emerg Med* 2001;**8**:1095–100.
  - 46 Hoffenberg S, Hill MB, Houry D. Does sharing process differences reduce patient length of stay in the emergency department? *Ann Emerg Med* 2001;**38**:533–40. doi:10.1067/mem.2001.119426
  - 47 Geller J, Janson P, McGovern E, *et al*. Loneliness as a predictor of hospital emergency department use. *J Fam Pract* 1999;**48**:801–4.
  - 48 van Uden CJT, Winkens R, Wesseling G, *et al*. Use of out of hours services: a comparison between two organisations. *Emerg Med J EMJ* 2003;**20**:184–7. doi:10.1136/emj.20.2.184
  - 49 Lombraill P, Vitoux-Brot C, Bourrillon A, *et al*. Another look at emergency room overcrowding: accessibility of the health services and quality of care. *Int J Qual Health Care J Int Soc Qual Health Care* 1997;**9**:225–35.
  - 50 Hansagi H, Edhag O, Allebeck P. High consumers of health care in emergency units: how to improve their quality of care. *Qual Assur Health Care Off J Int Soc Qual Assur Health Care* 1991;**3**:51–62.
  - 51 Graber DJ, Ardagh MW, O'Donovan P, *et al*. A telephone advice line does not decrease the number of presentations to Christchurch Emergency Department, but does decrease the number of phone callers seeking advice. *N Z Med J* 2003;**116**:U495.
  - 52 Cordell WH, Keene KK, Giles BK, *et al*. The high prevalence of pain in emergency medical care. *Am J Emerg Med* 2002;**20**:165–9.
  - 53  
54  
55  
56  
57  
58  
59  
60  
Lutze M, Ross M, Chu M, *et al*. Patient perceptions of emergency department fast track: a prospective pilot study comparing two models of care. *Australas Emerg Nurs J AENJ* 2014;**17**:112–8. doi:10.1016/j.aenj.2014.05.001



- 1  
2  
3 54 Cohen L, Génisson C, Savary R-P. *Les urgences hospitalières: miroir des*  
4 *dysfonctionnements du système de santé*. Paris: : Comission des Affaires Sociales sur les  
5 Urgences Hospitalières 2017.  
6  
7  
8 55 Combs S, Chapman R, Bushby A. Evaluation of Fast Track. *Accid Emerg Nurs* 2007;**15**:40–  
9 7. doi:10.1016/j.aaen.2006.07.006  
10  
11 56 Gupta A, Allen LA, Bhatt DL, *et al*. Association of the Hospital Readmissions Reduction  
12 Program Implementation With Readmission and Mortality Outcomes in Heart Failure.  
13 *JAMA Cardiol* 2018;**3**:44–53. doi:10.1001/jamacardio.2017.4265  
14  
15  
16 57 Singh S, Lin Y-L, Nattinger AB, *et al*. Variation in Readmission Rates by Emergency  
17 Departments and Emergency Department Providers Caring for Patients After Discharge.  
18 *J Hosp Med* 2015;**10**:705–10. doi:10.1002/jhm.2407  
19  
20 58 McIlvennan CK, Eapen ZJ, Allen LA. Hospital readmissions reduction program. *Circulation*  
21 2015;**131**:1796–803. doi:10.1161/CIRCULATIONAHA.114.010270  
22  
23  
24  
25  
26  
27  
28  
29  
30  
31  
32  
33  
34  
35  
36  
37  
38  
39  
40  
41  
42  
43  
44  
45  
46  
47  
48  
49  
50  
51  
52  
53  
54  
55  
56  
57  
58  
59  
60

1  
2  
3  
4  
5  
6  
7  
8  
9  
10  
11  
12  
13  
14  
15  
16  
17  
18  
19  
20  
21  
22  
23  
24  
25  
26  
27  
28  
29  
30  
31  
32  
33  
34  
35  
36  
37  
38  
39  
40  
41  
42  
43  
44  
45  
46  
47  
48  
49  
50  
51  
52  
53  
54  
55  
56  
57  
58  
59  
60

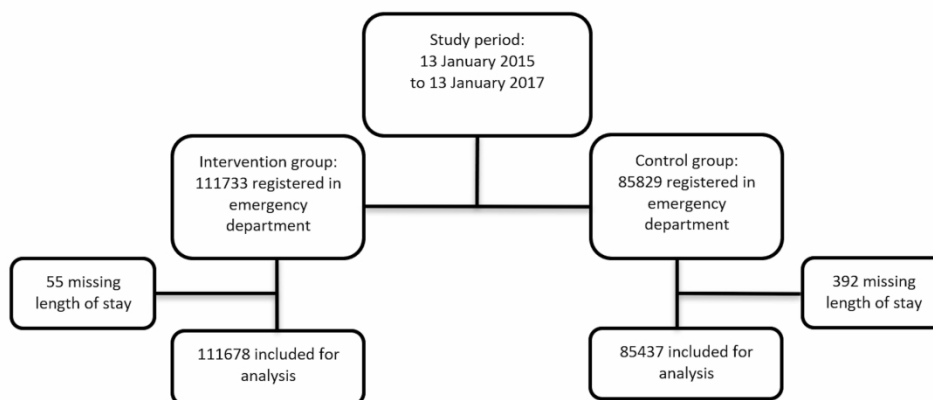

Flowchart of the study

209x148mm (300 x 300 DPI)

1  
2  
3  
4  
5  
6  
7  
8  
9  
10  
11  
12  
13  
14  
15  
16  
17  
18  
19  
20  
21  
22  
23  
24  
25  
26  
27  
28  
29  
30  
31  
32  
33  
34  
35  
36  
37  
38  
39  
40  
41  
42  
43  
44  
45  
46  
47  
48  
49  
50  
51  
52  
53  
54  
55  
56  
57  
58  
59  
60

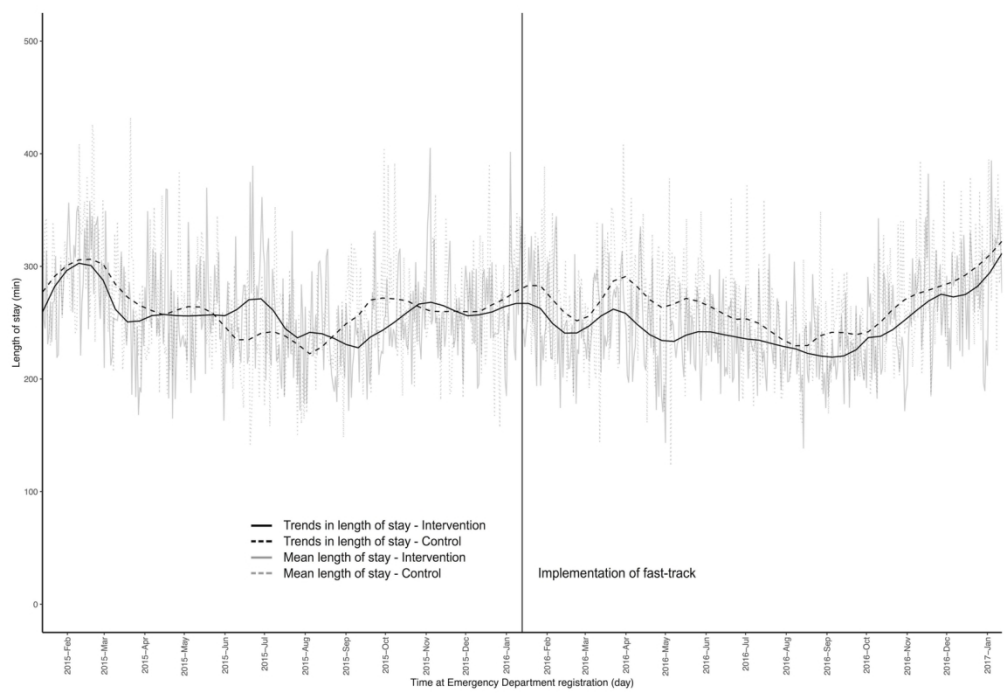

Daily mean emergency department length of stay during the study period, with trends obtained by locally weighted regression.

142x99mm (300 x 300 DPI)

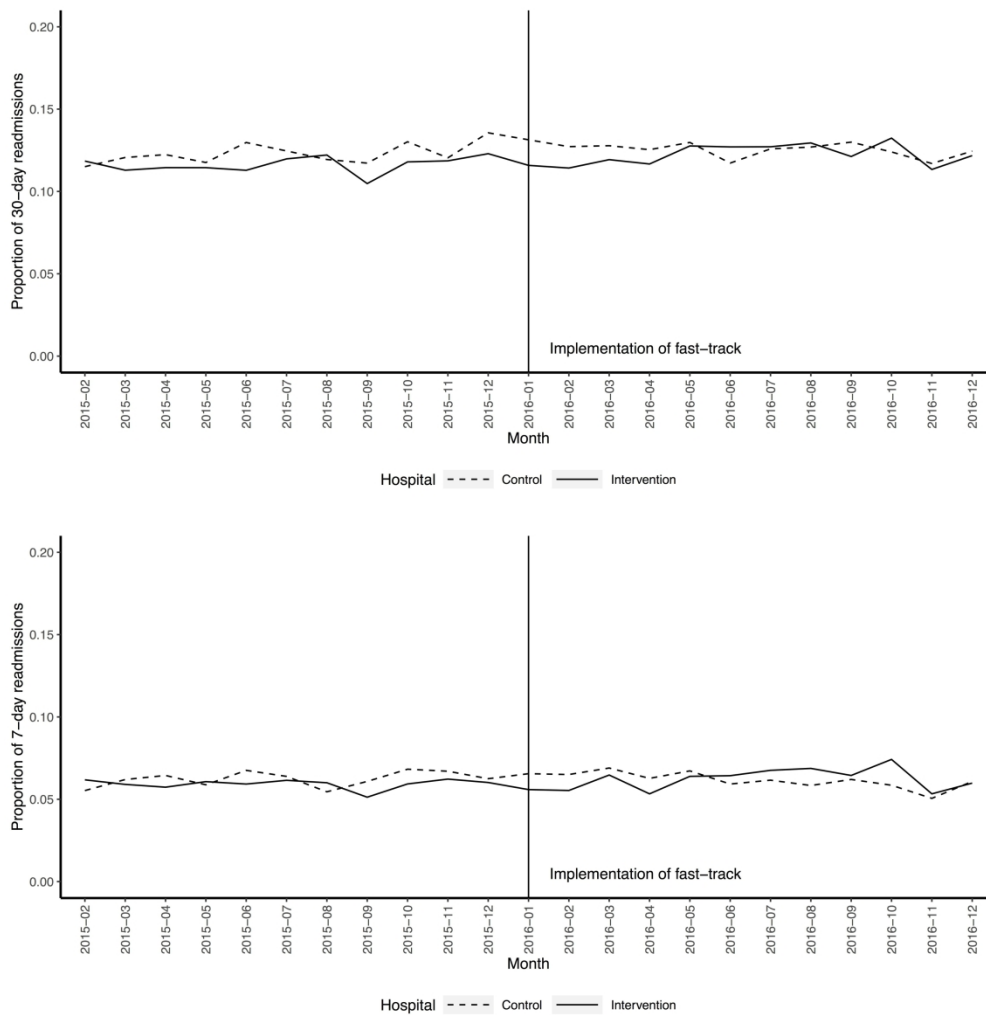

Proportion of emergency department 7-day and 30-day readmissions during the study period

266x280mm (300 x 300 DPI)

**SUPPLEMENTARY APPENDIX 1: Emergency department fast-track admission criteria****Exclusion criteria**

- Disabled patients or patients with reduced autonomy
- Age > 65 years
- Pain on visual analogic scale  $\geq$  8/10

**Triage**

If the answer to all following questions is no, the patient can be managed in the fast-track:

- Need to undress the patient for assessment/treatment
- The patient needs to be in supine position
- Need for blood sampling
- The patient needs a wound suture with expected duration of > 20 min

**Trauma patients managed in the fast-track**

- Trauma not requiring major analgesics
- Contusions and benign trauma, for patients WITHOUT anticoagulant medication
- Cranial trauma without initial loss of consciousness
- Minor wounds, except on tongue, eye, or scalp
- Abscess, minor subcutaneous tissue infection, subcutaneous foreign body
- Minor burn injuries except on face
- Wound management

**Medical patients managed in the fast-track****Gastro-enterology**

- Foreign body ingestion
- Constipation/diarrhea
- Acid reflux disease

**Ophtalmology**

- Ocular foreign body
- Conjunctivitis
- Palpebral infection

**Urology**

- Uncomplicated lower urinary tract infections

1  
2  
3 **Oto-rhino-laryngology**  
4

- 5 - Epistaxis  
6  
7 - Ear pain  
8  
9 - Dental abscess

10 **Dermatology**  
11

- 12 - Skin rash  
13  
14 - Benign skin disease without fever  
15  
16 - Insect bites  
17

18 **Others**  
19

- 20 - Urgent local drugs administration (e.g. intracavernous phenylephrine)  
21  
22  
23  
24  
25  
26  
27  
28  
29  
30  
31  
32  
33  
34  
35  
36  
37  
38  
39  
40  
41  
42  
43  
44  
45  
46  
47  
48  
49  
50  
51  
52  
53  
54  
55  
56  
57  
58  
59  
60

**STROBE 2007 (v4) Statement—Checklist of items that should be included in reports of cohort studies**

| Section/Topic                | Item # | Recommendation                                                                                                                                                                       | Reported on page # |
|------------------------------|--------|--------------------------------------------------------------------------------------------------------------------------------------------------------------------------------------|--------------------|
| <b>Title and abstract</b>    | 1      | (a) Indicate the study’s design with a commonly used term in the title or the abstract                                                                                               | 1                  |
|                              |        | (b) Provide in the abstract an informative and balanced summary of what was done and what was found                                                                                  | 1                  |
| <b>Introduction</b>          |        |                                                                                                                                                                                      |                    |
| Background/rationale         | 2      | Explain the scientific background and rationale for the investigation being reported                                                                                                 | 2                  |
| Objectives                   | 3      | State specific objectives, including any prespecified hypotheses                                                                                                                     | 3                  |
| <b>Methods</b>               |        |                                                                                                                                                                                      |                    |
| Study design                 | 4      | Present key elements of study design early in the paper                                                                                                                              | 3                  |
| Setting                      | 5      | Describe the setting, locations, and relevant dates, including periods of recruitment, exposure, follow-up, and data collection                                                      | 4                  |
| Participants                 | 6      | (a) Give the eligibility criteria, and the sources and methods of selection of participants. Describe methods of follow-up                                                           | 4                  |
|                              |        | (b) For matched studies, give matching criteria and number of exposed and unexposed                                                                                                  | N/A                |
| Variables                    | 7      | Clearly define all outcomes, exposures, predictors, potential confounders, and effect modifiers. Give diagnostic criteria, if applicable                                             | 5                  |
| Data sources/<br>measurement | 8*     | For each variable of interest, give sources of data and details of methods of assessment (measurement). Describe comparability of assessment methods if there is more than one group | 5                  |
| Bias                         | 9      | Describe any efforts to address potential sources of bias                                                                                                                            | 6                  |
| Study size                   | 10     | Explain how the study size was arrived at                                                                                                                                            | 7                  |
| Quantitative variables       | 11     | Explain how quantitative variables were handled in the analyses. If applicable, describe which groupings were chosen and why                                                         | 6                  |
| Statistical methods          | 12     | (a) Describe all statistical methods, including those used to control for confounding                                                                                                | 6                  |
|                              |        | (b) Describe any methods used to examine subgroups and interactions                                                                                                                  | 6                  |
|                              |        | (c) Explain how missing data were addressed                                                                                                                                          | 7                  |
|                              |        | (d) If applicable, explain how loss to follow-up was addressed                                                                                                                       | N/A                |
|                              |        | (e) Describe any sensitivity analyses                                                                                                                                                | N/A                |
| <b>Results</b>               |        |                                                                                                                                                                                      | N/A                |

|                          |     |                                                                                                                                                                                                              |        |
|--------------------------|-----|--------------------------------------------------------------------------------------------------------------------------------------------------------------------------------------------------------------|--------|
| Participants             | 13* | (a) Report numbers of individuals at each stage of study—eg numbers potentially eligible, examined for eligibility, confirmed eligible, included in the study, completing follow-up, and analysed            | Fig. 1 |
|                          |     | (b) Give reasons for non-participation at each stage                                                                                                                                                         | N/A    |
|                          |     | (c) Consider use of a flow diagram                                                                                                                                                                           | Fig. 1 |
| Descriptive data         | 14* | (a) Give characteristics of study participants (eg demographic, clinical, social) and information on exposures and potential confounders                                                                     | 8      |
|                          |     | (b) Indicate number of participants with missing data for each variable of interest                                                                                                                          | Fig. 1 |
|                          |     | (c) Summarise follow-up time (eg, average and total amount)                                                                                                                                                  | N/A    |
| Outcome data             | 15* | Report numbers of outcome events or summary measures over time                                                                                                                                               | 8      |
| Main results             | 16  | (a) Give unadjusted estimates and, if applicable, confounder-adjusted estimates and their precision (eg, 95% confidence interval). Make clear which confounders were adjusted for and why they were included | 10     |
|                          |     | (b) Report category boundaries when continuous variables were categorized                                                                                                                                    | 5      |
|                          |     | (c) If relevant, consider translating estimates of relative risk into absolute risk for a meaningful time period                                                                                             | N/A    |
| Other analyses           | 17  | Report other analyses done—eg analyses of subgroups and interactions, and sensitivity analyses                                                                                                               | 6      |
| <b>Discussion</b>        |     |                                                                                                                                                                                                              |        |
| Key results              | 18  | Summarise key results with reference to study objectives                                                                                                                                                     | 11     |
| <b>Limitations</b>       |     |                                                                                                                                                                                                              |        |
| Interpretation           | 20  | Give a cautious overall interpretation of results considering objectives, limitations, multiplicity of analyses, results from similar studies, and other relevant evidence                                   | 15     |
| Generalisability         | 21  | Discuss the generalisability (external validity) of the study results                                                                                                                                        | 12     |
| <b>Other information</b> |     |                                                                                                                                                                                                              |        |
| Funding                  | 22  | Give the source of funding and the role of the funders for the present study and, if applicable, for the original study on which the present article is based                                                | 15     |

\*Give information separately for cases and controls in case-control studies and, if applicable, for exposed and unexposed groups in cohort and cross-sectional studies.

**Note:** An Explanation and Elaboration article discusses each checklist item and gives methodological background and published examples of transparent reporting. The STROBE checklist is best used in conjunction with this article (freely available on the Web sites of PLoS Medicine at <http://www.plosmedicine.org/>, Annals of Internal Medicine at <http://www.annals.org/>, and Epidemiology at <http://www.epidem.com/>). Information on the STROBE Initiative is available at [www.strobe-statement.org](http://www.strobe-statement.org).



# BMJ Open

## The impact of the implementation of a fast-track on emergency department length of stay and quality of care indicators in the Champagne-Ardenne region: a before-after study

|                                 |                                                                                                                                                                                                                                                                                                                                                                                                                                                                                                                                                                                                                                                                                                                                                                                                                    |
|---------------------------------|--------------------------------------------------------------------------------------------------------------------------------------------------------------------------------------------------------------------------------------------------------------------------------------------------------------------------------------------------------------------------------------------------------------------------------------------------------------------------------------------------------------------------------------------------------------------------------------------------------------------------------------------------------------------------------------------------------------------------------------------------------------------------------------------------------------------|
| Journal:                        | <i>BMJ Open</i>                                                                                                                                                                                                                                                                                                                                                                                                                                                                                                                                                                                                                                                                                                                                                                                                    |
| Manuscript ID                   | bmjopen-2018-026200.R3                                                                                                                                                                                                                                                                                                                                                                                                                                                                                                                                                                                                                                                                                                                                                                                             |
| Article Type:                   | Research                                                                                                                                                                                                                                                                                                                                                                                                                                                                                                                                                                                                                                                                                                                                                                                                           |
| Date Submitted by the Author:   | 29-Apr-2019                                                                                                                                                                                                                                                                                                                                                                                                                                                                                                                                                                                                                                                                                                                                                                                                        |
| Complete List of Authors:       | Chrusciel, Jan; Centre Hospitalier de Troyes, Department of Medical Information and Performance Evaluation; University Hospitals of Reims, Department of Research and Public Health<br>Fontaine, Xavier; Manchester Hospital, Emergency Department<br>Devillard, Arnaud; Centre Hospitalier de Troyes, Emergency Department<br>Cordonnier, Aurélien; Manchester Hospital, Department of Medical Information<br>Kanagaratnam, Lukshe; University Hospitals of Reims, Department of Research and Public Health; Université de Reims Champagne-Ardenne, Faculty of Medicine, EA 3797<br>Laplanche, David; Centre Hospitalier de Troyes, Department of Medical Information and Performance Evaluation<br>Sanchez, Stéphane; Centre Hospitalier de Troyes, Department of Medical Information and Performance Evaluation |
| <b>Primary Subject Heading</b>: | Emergency medicine                                                                                                                                                                                                                                                                                                                                                                                                                                                                                                                                                                                                                                                                                                                                                                                                 |
| Secondary Subject Heading:      | Public health                                                                                                                                                                                                                                                                                                                                                                                                                                                                                                                                                                                                                                                                                                                                                                                                      |
| Keywords:                       | Emergency Department, Length of stay, Fast-track, Hospital readmissions, Healthcare Quality                                                                                                                                                                                                                                                                                                                                                                                                                                                                                                                                                                                                                                                                                                                        |
|                                 |                                                                                                                                                                                                                                                                                                                                                                                                                                                                                                                                                                                                                                                                                                                                                                                                                    |

SCHOLARONE™  
Manuscripts

# The impact of the implementation of a fast-track on emergency department length of stay and quality of care indicators in the Champagne-Ardenne region: a before-after study

Jan Chrusciel<sup>1,5</sup>, Xavier Fontaine<sup>2</sup>, Arnaud Devillard<sup>3</sup>, Aurélien Cordonnier<sup>4</sup>, Lukshe Kanagaratnam<sup>5,6</sup>, David Laplanche<sup>1</sup>, Stéphane Sanchez<sup>1</sup>

<sup>1</sup>Department of Medical Information and Performance Evaluation, Centre Hospitalier de Troyes, Troyes, France; <sup>2</sup>Emergency Department, Manchester Hospital, Charleville-Mézières, France; <sup>3</sup>Emergency Department, Centre Hospitalier de Troyes, Troyes, France; <sup>4</sup>Medical Information Department, Manchester Hospital, Charleville-Mézières, France. <sup>5</sup>Department of Research and Public Health, University Hospitals of Reims, Reims, France; <sup>6</sup>Faculty of Medicine, EA 3797, University of Reims Champagne-Ardenne, Reims, France

## Abstract

**Objectives:** We aimed to evaluate the effect of the implementation of a fast-track on Emergency Department (ED) length of stay (LOS) and quality of care indicators.

**Design:** Adjusted before-after analysis.

**Setting:** A large hospital in the Champagne-Ardenne region, France.

**Participants:** Patients admitted to the emergency department between 13 January 2015 and 13 January 2017.

**Intervention:** Implementation of a fast-track for patients with small injuries or benign medical conditions (13 January 2016).

**Primary and Secondary Outcome Measures:** Proportion of patients with LOS  $\geq$  4h and proportion of access block situations (when patients cannot access an appropriate hospital bed within 8 hours). 7-day readmissions and 30-days readmissions.

**Results:** The emergency department of the intervention hospital registered 53768 stays in 2016 and 57965 in 2017 (+7.8%). In the intervention hospital, the median length of stay was 215 minutes before the intervention and 186 minutes after the intervention. The exponentiated before-after estimator for ED LOS  $\geq$  4h was 0.79; 95% confidence interval (CI) 0.77– 0.81. The exponentiated before-after estimator for access block was 1.19; 95% CI 1.13 – 1.25. There was an increase in the proportion of 30-day readmissions in the intervention hospital (from 11.4% to 12.3%). After the intervention, the proportion of patients leaving without being seen by a physician decreased from 10.0% to 5.4%.

**Conclusions:** The implementation of a fast-track was associated with a decrease in stays lasting  $\geq$ 4 hours without a decrease in access block. Further studies are needed to evaluate the causes of variability in emergency department LOS and their connections to quality of care indicators.

Correspondence to: Jan Chrusciel, Department of Medical Information and Performance Evaluation, Centre Hospitalier de Troyes, 101 Avenue Anatole France, 10003 Troyes, France.

Tel: +33 (0) 3 26 78 77 63. Fax: + 33 (0) 3 25 49 49 50. E-mail: [jan.chrusciel.md@gmail.com](mailto:jan.chrusciel.md@gmail.com)

## Keywords

Emergency Department – Length of stay – Fast-track – Hospital readmissions – Healthcare Quality

## Strengths and Limitations of this study

- We measured the effect of the implementation of a fast-track on length of stay and quality of care indicators
- We controlled for potential confounders (primary diagnosis, severity ...) with a multivariable analysis by logistic regression. The uncertainty induced by missing values was accounted for by pooling estimates from multiple imputations
- The intervention was the only major change in the hospital under study
- Further studies could include more hospitals

## Introduction

The number of annual emergency department (ED) visits has doubled between 1980 and 2004 in France [1], and is still rising (+3.7% between 2014 and 2015). This phenomenon has been observed in most developed countries [2], and is a challenge for physicians and policymakers. ED crowding was defined by the American College of Emergency Physicians (ACEP) as a mismatch between the need for emergency care and the emergency department's ability to provide this care [3]. ED crowding has been associated with longer ED length of stay (LOS) [4], inadequate pain management [5], and worse patient outcomes [6]. A crowded emergency department may sometimes need to fall back on ambulance diversion, redirecting patients to nearby hospitals. Finding the best organization for EDs is therefore a public health priority with ethical implications [3]. The causes of ED crowding include increased demand from patients, epidemics, lack of trained staff, and lack of hospital beds [7]. Numerous scores have been proposed to measure ED crowding (EDWIN, NEDOCS, READI, Work Score) however their predictive power typically does not outperform simpler indicators such as bed occupancy [8,9]. Time series analysis can predict emergency department activity with a Relative Mean Absolute Performance (RMAP) of 90% [10]. A shorter length of stay results in less complications [11,12], higher odds of survival for severe

1  
2  
3 patients [13], increased patient satisfaction [14,15], and lower healthcare spending [16]. The  
4  
5 optimization of patient flow has been studied extensively [17,18]. Numerous strategies have  
6  
7 been proposed to regulate patient flow in the emergency department : Care Coordination  
8  
9 Teams, whose mission involves orienting older patients towards appropriate healthcare,  
10  
11 observation units (caring for patients up to 72h), chest pain units, home-based healthcare  
12  
13 [19]. A common strategy is the use of fast-tracks, dedicated pathways aimed towards the  
14  
15 fast delivery of healthcare for patients with benign medical conditions scheduled for rapid  
16  
17 discharge. Fast-tracks have been implemented in small and larger hospitals [20]. In 2002,  
18  
19 58% of 17 surveyed Australian public hospitals functioned with a fast-track [19]. A Monte-  
20  
21 Carlo simulation showed that implementing a fast-track with a dedicated nurse could  
22  
23 shorten median waiting times up to 35% [21]. Previous studies have evaluated the effect of  
24  
25 implementing a fast-track [22–25], however the length of these studies was short, typically  
26  
27 less than 6 months. One 2-year study with a fast-track staffed with mid-level providers did  
28  
29 not adjust for patient severity [26]. The aim of this study was to assess the impact of an  
30  
31 emergency department restructuring with the implementation of a fast-track on ED  
32  
33 length of stay in the setting of a large hospital in France. Secondary objectives were to study  
34  
35 predictors of ED LOS, and to assess the effect of the emergency department restructuring  
36  
37 on 7-day readmissions, 30-day readmissions, and the proportion of patients leaving without  
38  
39 being seen.  
40  
41  
42  
43  
44  
45  
46  
47  
48  
49  
50

## 51 **Methods**

52 We conducted a before-after analysis with adjustment on confounders.  
53  
54  
55  
56  
57  
58  
59

## 60 **Population**

1  
2  
3 The region in which the study took place is one of the least densely populated regions in  
4  
5 France. The age structure of the region resembles the pooled age structure of the rest of the  
6  
7 country. The intervention hospital (Troyes Hospital) was a large hospital with 442 medical  
8  
9 beds, 127 surgical beds and 63 beds dedicated to gynaecology and obstetrics, serving an  
10  
11 area of approximately 40 kilometres radius (25 miles). The emergency department hosted  
12  
13 an observation unit.  
14  
15  
16

### 20 **Patient and Public involvement**

21  
22 Patients were not involved in the design or analysis of this study.  
23  
24  
25

### 27 **Intervention**

28  
29 The intervention included an extension of the ED from 15 to 27 consultation rooms and the  
30  
31 opening of a fast-track for patients with small injuries or benign medical conditions. The  
32  
33 fast-track in the intervention hospital had 6 rooms. The fast-track is a healthcare pathway  
34  
35 for the assessment and treatment of low severity patients, situated in a dedicated area of  
36  
37 the emergency department. The intervention was implemented on 13 January 2016. Two ED  
38  
39 physicians managed adult patients and paediatric traumatology in the fast-track. When ED  
40  
41 physicians were not available, they were replaced by residents. Gynaecology and psychiatry  
42  
43 patients could also be managed in dedicated areas of the fast-track. Entry criteria for the  
44  
45 fast-track were pre-defined in a protocol (Supplementary Appendix 1).  
46  
47  
48  
49  
50  
51

### 54 **Outcomes**

55  
56 The main outcome was an emergency department length of stay  $\geq 4$  hours [27,28]. LOS was  
57  
58 defined as the time elapsed between registration in the ED to the time the patient leaves  
59  
60

the ED. The secondary outcome was access block, defined by the Australasian College for Emergency Medicine as the situation where patients who need hospital care cannot access an appropriate hospital bed within a reasonable delay (8 hours) [29]. We used the Patient State (PS) classification [10] presented in Table 1 to identify patients that needed to be admitted to the hospital (PS 3, 4, 5, 6 and 7). Time to physician appraisal and LOS were extracted from local hospital databases (data extracted from Resurgences© in the intervention hospital). Other quality of care indicators included the number of patients leaving without being seen [30] and the monthly proportion of 30-day and 7-day readmissions [31].

**Table 1:** Patient State (PS) classification for patients admitted to the emergency department

| PS class | Description                                                                   |
|----------|-------------------------------------------------------------------------------|
| PS1      | Patient with moderate treatment, discharged from emergency department         |
| PS2      | Patient with major treatment, discharged from emergency department            |
| PS3      | Patient with moderate treatment, hospitalized after emergency department stay |
| PS4      | Patient with major treatment, hospitalized after emergency department stay    |
| PS5      | Patients requiring immediate treatment, not elsewhere classified              |
| PS6      | Patients requiring immediate intensive care/resuscitation                     |
| PS7      | Died in emergency Department                                                  |

### Statistical methods

Continuous variables were summarized with means and standard deviations or medians and the interquartile range. Categorical variables were presented with absolute frequencies and proportions. A descriptive analysis was carried out for LOS by period. Differences between the period before the intervention and the period after the intervention were compared with Student's *t* test or with the Mann-Whitney *U* test for asymmetrically distributed variables, and with the  $\chi^2$  test for categorical variables. Summary statistics were provided

1  
2  
3 for the waiting times of patients with selected diagnoses (pneumonia, stroke, myocardial  
4 infarction and heart failure). To facilitate modelling, length of stay was transformed into a  
5 binary variable using thresholds classically found in the literature [28]. Separate models  
6 were fitted to study the primary outcome and access block. The effect of the intervention  
7 on the primary outcome was evaluated for all patients. The effect of the intervention on  
8 access block was evaluated in an analysis restricted to patients who needed to be  
9 hospitalized after their emergency department stay. Multivariable logistic regression models  
10 were estimated to adjust for confounders. The model was  $\text{Logit}(p) = \alpha + \pi P + T'\tau + X'\beta$ , with  
11  $p$  being the probability of the outcome,  $\alpha$  the intercept,  $P$  an indicator variable for period,  $T$   
12 a vector of additional time variables (effect of being admitted during the night, the weekend  
13 or winter months) and  $X$  a vector of individual-level covariates. Age was grouped in  
14 categories relevant to clinical practice. Primary diagnosis was defined using chapters of the  
15 International Classification of Disease (10<sup>th</sup> revision) to avoid problems in estimation due to  
16 sparse data. Patient severity was included in the model using the PS classification [10]. Time  
17 variables included indicator variables for admission during the night (22:00 – 06:00), and  
18 during weekends (Saturday and Sunday). An indicator variable for December and January,  
19 where flu epidemics often occur, was included in the model. The study sample was a  
20 convenience sample with a time window constructed symmetrically around the  
21 intervention, allowing to control for seasonal effects. The proportion of patients leaving  
22 without being seen was a secondary outcome. Due to the paucity of information on these  
23 patients, it was not included as a dependent variable for multivariable analysis. Statistical  
24 analyses, data management and figures were realised using R version 3.5.3 ([www.r-](http://www.r-project.org)  
25 [project.org](http://www.r-project.org)) [32].  
26  
27  
28  
29  
30  
31  
32  
33  
34  
35  
36  
37  
38  
39  
40  
41  
42  
43  
44  
45  
46  
47  
48  
49  
50  
51  
52  
53  
54  
55  
56  
57  
58  
59  
60

## Ethics Statement

All legal requirements for epidemiological studies were respected, and the French national commission governing the application of data privacy laws issued an approval for the project. Since the study was strictly observational, in accordance with the laws that regulate “non-interventional clinical research” in France, namely articles L.1121-1 and R.1121-2 of the Public Health Code, it did not require a written informed consent from participants or approval from an ethics committee.

## Results

Between 13 January 2015 and 13 January 2017, 111733 ED stays were registered in the intervention hospital (Figure 1).

### Figure 1 Flowchart

53768 stays in 2016 and 57965 in 2017 (+7.8%). Regarding human resources, physicians increased from 11.5 to 14.5 Full-Time Equivalents (FTE), nurses from 35.3 to 36.8 FTE, and assistant nurses from 16.8 to 19.5 FTE. The median length of stay was 215 min (interquartile range Q1 – Q3 : 111 - 361) before the intervention and 186 min (98 - 340) after the intervention (Table 2). The proportion of patients with LOS < 4 hours changed from 55.2% to 60.6%. Within the subgroups of patients subsequently admitted to the hospital, patients consulting for pneumonia had a decrease in median time to physician assessment after the intervention: from 87 min (41 - 173) to 79 min (36 - 165). Stroke patients also had decreased median waiting times: from 77 (34 - 155) to 62 (33 - 132) minutes. The time to physician assessment remained unchanged for patients consulting for myocardial infarction and heart



failure: from 61 (31 - 149) before the intervention to 63 (30 - 150) minutes after the intervention.

**Table 2: Demographic characteristics of study population, length of stay and readmissions in the intervention hospital**

|                                                                    | Intervention                         |                                      | P-value |
|--------------------------------------------------------------------|--------------------------------------|--------------------------------------|---------|
|                                                                    | 2015-2016*                           | 2016-2017†                           |         |
|                                                                    | mean (SD), median (Q1 - Q3) or n (%) | mean (SD), median (Q1 - Q3) or n (%) |         |
| <i>n</i>                                                           | 53768                                | 57965                                | -       |
| Age (years): mean (SD)                                             | 40.4 (27.3)                          | 39.8 (27.4)                          | <0.001‡ |
| Sex: female – n (%)                                                | 26712 (49.7)                         | 29235 (50.4)                         | 0.01§   |
| Length of stay (min): median (Q1 - Q3)                             | 215 (111 - 361)                      | 186 (98 - 340)                       | <0.001‡ |
| 7-day readmissions: n (%)                                          | 3177 (5.9)                           | 3642 (6.3)                           | 0.01§   |
| 30-day readmissions: n (%)                                         | 6105 (11.4)                          | 7129 (12.3)                          | <0.001§ |
| Patients admitted to hospital after emergency department: <i>n</i> | 14795                                | 14864                                | -       |
| Length of stay (min): median (Q1 - Q3)                             | 316 (181 - 465)                      | 333 (187 - 490)                      | <0.001‡ |
| Patients not admitted to hospital after emergency department       |                                      |                                      |         |
| <i>n</i>                                                           | 38971                                | 43100                                | -       |
| Length of stay (min): median (Q1 - Q3)                             | 185 (97 - 310)                       | 155 (86 - 272)                       | <0.001‡ |

SD: Standard Deviation. Q1 – Q3: Interquartile range

\* 13/01/2015 to morning of 13/01/2016. † 13/01/2016 afternoon to 13/01/2017. ‡ Mann-Whitney *U* test. §  $\chi^2$  test

The exponentiated before-after estimator was 0.788 (95% CI 0.767 - 0.810,  $p < 0.0001$ ), therefore the intervention successfully reduced the number of ED stays with LOS  $\geq 4$  hours (Table 3). However, the estimate for access block was 1.188 (95% CI 1.126 - 1.253,  $p < 0.001$ ): the intervention did not seem effective in helping the patients who needed it to access an

1  
2  
3 appropriate hospital bed in a reasonable amount of time (<8h). In 4.8 % of cases, none of  
4  
5 the scores that constituted the PS classification were present. These cases were essentially  
6  
7 patients who left the emergency department without being seen. Age was linearly related  
8  
9 with length of stay, with younger patients having a shorter LOS. Weekends were associated  
10  
11 with a shorter LOS. Patients admitted for injuries (ICD-10 codes S00 to T98) and skin  
12  
13 problems (L00 to L99) tended to have a short LOS, while patients admitted for neurologic  
14  
15 diseases (G00 – G99) tended to have a longer LOS. Trends in daily median LOS are shown in  
16  
17  
18  
19  
20  
21  
22  
23  
24  
25  
26  
27  
28  
29  
30  
31  
32  
33  
34  
35  
36  
37  
38  
39  
40  
41  
42  
43  
44  
45  
46  
47  
48  
49  
50  
51  
52  
53  
54  
55  
56  
57  
58  
59  
60

Figure 2.

**Figure 2** Daily median emergency department length of stay during the study period (trends obtained by locally weighted regression).

### Effect on quality of care indicators

Overall, 12.0% of stays were 30-day readmissions. Most readmissions (6.1%) occurred within the first seven days. There was a trend for increasing 30-day readmissions during the study period (Figure 3). Seven-day readmissions increased from 5.9% to 6.3% in the intervention group. After the intervention, the proportion of patients leaving without being seen by a physician decreased from 10.0% to 5.4%.

**Figure 3** Proportion of emergency department 7-day and 30-day readmissions during the study period

**Table 3:** Multivariable logistic regression for length of stay  $\geq$  4h and access block.

| Variable                                                                    | Odds Ratio<br>(emergency<br>department<br>length of stay<br>≥ 4 hours for<br>all patients)* | 95% Confidence<br>Interval | Odds Ratio<br>(Access block:<br>emergency<br>department length<br>of stay ≥ 8h for<br>hospitalized<br>patients)* | 95% Confidence<br>Interval |
|-----------------------------------------------------------------------------|---------------------------------------------------------------------------------------------|----------------------------|------------------------------------------------------------------------------------------------------------------|----------------------------|
| <b>Period: after intervention<br/>(reference = before<br/>intervention)</b> | 0.788                                                                                       | (0.767 - 0.810)            | 1.188                                                                                                            | (1.126 - 1.253)            |
| <b>7-day readmission</b>                                                    | 0.833                                                                                       | (0.786 - 0.882)            | 0.867                                                                                                            | (0.773 - 0.973)            |
| <b>8 – 30 days readmission</b>                                              | 0.974                                                                                       | (0.918 – 1.033)            | 0.938                                                                                                            | 0.849 – 1.037              |
| <b>Weekend day</b>                                                          | 0.936                                                                                       | (0.908 - 0.966)            | 0.761                                                                                                            | (0.714 - 0.811)            |
| <b>Night</b>                                                                | 0.594                                                                                       | (0.572 - 0.618)            | 0.878                                                                                                            | (0.811 - 0.950)            |
| <b>Principal Diagnosis<br/>(ICD-10 Chapter)</b>                             |                                                                                             |                            |                                                                                                                  |                            |
| <b>Injury, poisoning</b>                                                    | 0.559                                                                                       | (0.508 - 0.616)            | 0.641                                                                                                            | (0.568 - 0.723)            |
| <b>Diseases of the nervous<br/>system</b>                                   | 2.113                                                                                       | (1.846 – 2.419)            | 1.269                                                                                                            | (1.065 - 1.511)            |
| <b>Skin and subcutaneous<br/>tissue</b>                                     | 0.466                                                                                       | (0.404 - 0.537)            | 0.573                                                                                                            | (0.413 - 0.795)            |
| <b>Neoplasms</b>                                                            | 1.175                                                                                       | (0.843 – 1.637)            | 2.098                                                                                                            | (1.486 - 2.963)            |
| <b>Diseases of the<br/>circulatory system</b>                               | 1 (Reference)                                                                               | -                          | 1 (Reference)                                                                                                    | -                          |
| <b>Month: December and<br/>January (reference = other<br/>months)</b>       | 1.159                                                                                       | (1.118 - 1.202)            | 1.49                                                                                                             | (1.390 - 1.597)            |
| <b>Severity (PS classification)</b>                                         |                                                                                             |                            |                                                                                                                  |                            |
| <b>PS1</b>                                                                  | 1 (Reference)                                                                               | -                          | -                                                                                                                | -                          |
| <b>PS2</b>                                                                  | 1.890                                                                                       | (1.668 - 2.142)            | -                                                                                                                | -                          |
| <b>PS3</b>                                                                  | 2.234                                                                                       | (2.157 – 2.313)            | 1 (Reference)                                                                                                    | -                          |
| <b>PS4</b>                                                                  | 1.669                                                                                       | (1.560 - 1.785)            | 0.804                                                                                                            | (0.747 - 0.865)            |
| <b>PS5</b>                                                                  | 0.470                                                                                       | (0.395 - 0.560)            | 0.397                                                                                                            | (0.316 - 0.499)            |
| <b>PS6</b>                                                                  | 0.336                                                                                       | (0.268 - 0.420)            | 0.246                                                                                                            | (0.176 - 0.344)            |
| <b>PS7</b>                                                                  | 0.315                                                                                       | (0.201 - 0.492)            | 0.333                                                                                                            | (0.175 - 0.637)            |
| <b>Sex: Female (reference =<br/>male)</b>                                   | 0.994                                                                                       | (0.966 – 1.022)            | 1.072                                                                                                            | (1.014 - 1.134)            |
| <b>Age (years)</b>                                                          |                                                                                             |                            |                                                                                                                  |                            |
| <b>50 - 64</b>                                                              | 1.611                                                                                       | (1.547 - 1.679)            | 1.387                                                                                                            | (1.271- 1.514)             |
| <b>65 - 74</b>                                                              | 2.152                                                                                       | (2.041 – 2.269)            | 1.681                                                                                                            | (1.532 - 1.846)            |
| <b>75 – 89</b>                                                              | 3.367                                                                                       | (3.210 – 3.532)            | 2.025                                                                                                            | (1.873 - 2.189)            |
| <b>≥ 90</b>                                                                 | 4.330                                                                                       | (3.970 - 4.721)            | 2.117                                                                                                            | (1.906 - 2.352)            |
| <b>0 – 17</b>                                                               | 0.292                                                                                       | (0.280 – 0.304)            | 0.099                                                                                                            | (0.082 - 0.120)            |
| <b>18 - 50</b>                                                              | 1<br>(Reference)                                                                            | -                          | 1<br>(Reference)                                                                                                 | -                          |

---

ICD-10: International Classification of Disease, 10<sup>th</sup> revision. PS: Patient State

\* Multivariable analysis adjusted for age, sex, time of the day (nighttime or daytime), time in the week (weekend day or weekday), time of the year (December and January or other months, admission diagnosis (grouped using ICD-10 chapters) and severity (using the PS classification).

## Discussion

Our study showed that implementing a fast-track can decrease the median length of stay and number of stays lasting  $\geq 4$  hours in the emergency department of a large general hospital. We did not observe a decrease in LOS for patients requiring hospitalization. However, the length of stay for severe patients may have been limited by hospital-level bed availability rather than ED-related factors [33]. Indeed, other studies have found that the implementation of a fast-track did not adversely affect LOS for patients subsequently admitted to the hospital [34].

The addition of new beds to the emergency department could explain part of our results. However, the addition of new beds does not guarantee improved access to care. In a study by Han et al., the time between ambulance diversion episodes was not significantly different after expanding an ED from 28 to 53 beds [35].

Asplin et al. consider the emergency department as a system with 3 components: *input*, *throughput*, and *output* [36]. The input component includes events, diseases or other factors that contribute to the demand for urgent care. Throughput includes triage, room placement, diagnosis and treatment. The implementation of the fast-track can accelerate throughput for patients not subsequently admitted to the hospital. The decrease in LOS can be explained by decreased crowding due to rapid patient discharge, floorplan modifications allowing faster patient transfers, or physician and nurse role adjustments [37,38]. Fast-tracks can efficiently coexist with other patient streams, such as tracks dedicated to

1  
2  
3 complex ambulant patients [39]. Regarding output, the limiting factor for ED LOS is often  
4  
5 lack of available hospital beds. Some authors have suggested that an occupancy of 85% is a  
6  
7 suitable target to ensure that new patients are not left without beds [40]. This seems  
8  
9 difficult to implement under current conditions. A systematic review of 220 articles  
10  
11 discussing strategies to prevent « access block » [29] mentions interventions to diminish the  
12  
13 number of patients admitted to the ED and observation wards [41]. Other solutions to  
14  
15 prevent ED crowding are: sharing optimal care processes [42], enrolling additional staff [8],  
16  
17 or eventually redirecting patients towards other centers [7]. Causes of increased demand for  
18  
19 urgent care include the ageing of populations, with a higher prevalence of chronic diseases,  
20  
21 the scarcity of primary care, and changing perceptions of what is considered urgent.  
22  
23 Solitude is a major driver of ED consultations [43]. The efficacy of gatekeeping procedures  
24  
25 has yet to be evaluated [44]. The patients that frequently consult in the emergency  
26  
27 department, however, are often disadvantaged by a low socio-economic status [45] and can  
28  
29 be considered a high-risk group regarding morbidity and mortality [46]. Prior contact with  
30  
31 the ED could help improve communication with the patient, although an effect on the  
32  
33 number of ED admissions remains to be established [47]. Pain is a major complaint in the  
34  
35 ED, and patients with chronic pain could be more likely to consult [48]. Access to  
36  
37 programmed care is crucial, and patients who cannot access programmed care will come  
38  
39 back to the emergency department. In an Australian study, around half of patients would  
40  
41 prefer to see a general practitioner for a similar problem than to be treated in the  
42  
43 emergency fast-track [49]. In this regard, what is happening in emergency departments can  
44  
45 be seen as a mirror of the dysfunctions in a healthcare system [50].

46  
47 After the implementation of the fast-track, the number of patients registered in the ED  
48  
49 increased by 7.8%. This is unlikely to be a fluctuation in epidemiological trends, but rather  
50  
51  
52  
53  
54  
55  
56  
57  
58  
59  
60

1  
2  
3 reflects an increased demand generated by an easier access to timely care. Patients leaving  
4  
5 without being seen diminished from 10.0% to 5.4%, similar to the proportions in studies by  
6  
7  
8 Combs et al [51] and Sanchez et al. [26].  
9

10 Among other quality of care indicators, we evaluated emergency department 7 and 30-day  
11  
12 readmissions [52]. The main rationale for including these indicators was to appreciate the  
13  
14 extent by which the decrease in LOS was explained by readmissions of the same patients.  
15  
16 Seven-day readmissions increased after the implementation of the fast-track. Patients  
17  
18 coming back to the hospital within 7 days had shorter lengths of stay during the  
19  
20 readmission. One possible explanation is the availability of the patient's recent history,  
21  
22 making medical assessment simpler. Emergency departments may have a role to play in  
23  
24 preventing hospital readmissions [53]. However, recent studies show that hospital  
25  
26 readmissions are often not avoidable, and are largely influenced by factors on which  
27  
28 hospitals have no control, like socio-economic status [31,54]. As is often the case, these  
29  
30 indicators need to be appraised in conjunction with other quality of care indicators.  
31  
32  
33  
34  
35

36  
37 The intervention was the only major change in the emergency department during this  
38  
39 period. The major limitation of our study was that the effect of implementing a fast-track  
40  
41 was confounded with the addition of staff and new beds to the ED to allow it to function  
42  
43 effectively under increased constraints. However, the reported increase in full-time  
44  
45 equivalents was due to the administrative transfer of staff from the mobile unit for  
46  
47 emergencies and intensive care. Only one additional nurse was fully allocated to the ED. As  
48  
49 the mobile unit's main activity is to intervene outside of the hospital, it is unlikely that the  
50  
51 observed changes in length of stay were entirely explained by the increase in human  
52  
53 resources. Moreover, because supplemental beds were added to the ED as part of the  
54  
55 intervention, the ratio of staff to beds decreased. A multiple imputation was carried out to  
56  
57  
58  
59  
60

1  
2  
3 account for the uncertainty induced by missing PS severity scores, with  $m = 20$  imputations.  
4  
5 Patients who left without being seen were kept in the imputation model. As these patients  
6  
7 were more frequent in the period before the intervention, and their length of stay was  
8  
9 shorter than the rest of the population (median 156 min), the efficacy of the intervention  
10  
11 regarding length of stay could be underestimated. To conclude, our study showed an  
12  
13 increase in short stays for low acuity patients following the implementation of the fast-  
14  
15 track. In this regard, the fast-track consolidated the emergency department's role of  
16  
17 compensating deficiencies in access to primary care, without favourably impacting length of  
18  
19 stay for severe patients. Hospital-level bed availability is critical to ensure efficient  
20  
21 healthcare for patients registered to the ED. Studies including more hospitals and a larger  
22  
23 array of quality of care indicators are warranted to estimate the effect of implementing a  
24  
25 fast-track on emergency department performance and population health outcomes.  
26  
27  
28  
29  
30  
31  
32  
33  
34

35 **Funding statement:** This research received no specific grant from any funding agency in the  
36  
37 public, commercial or not-for-profit sectors.

38 **Competing interests statement:** All authors have no competing interests to declare.

39  
40 **Author contributions:** JC, DL, AD, LK and SS designed the study. SS, DL, XF, AC contributed to  
41  
42 the acquisition of data. JC conducted the statistical analysis. JC, XF, AD, AC, DL, LK and SS  
43  
44 contributed to drafting the article or revising it critically for important intellectual content.  
45  
46  
47  
48

49 All authors read and approved the final manuscript.

50  
51 **Acknowledgements:** We would like to thank Mohamed Afilal and Priscilla De Souza for their  
52  
53 contributions in data extraction.  
54  
55

56  
57 **Data sharing statement:** To prevent dissemination of sensitive patient data, the dataset on  
58  
59 which this study was based was not made available to the public. Deidentified data can be  
60

1  
2  
3 obtained from the corresponding author upon reasonable request - ORCID ID 0000-0002-  
4  
5 8364-6506.  
6  
7  
8  
9  
10  
11  
12  
13

## 14 References

- 17 1 Cour des comptes. Les urgences médicales : constats et évolution récente. In: *Rapport public annuel 2007*. Paris: : Cour des comptes 2007. 1.
- 18  
19 2 Pines JM, Hilton JA, Weber EJ, *et al*. International perspectives on emergency  
20 department crowding. *Acad Emerg Med Off J Soc Acad Emerg Med* 2011;**18**:1358–70.  
21 doi:10.1111/j.1553-2712.2011.01235.x  
22
- 23 3 Moskop JC, Sklar DP, Geiderman JM, *et al*. Emergency Department Crowding, Part 1—  
24 Concept, Causes, and Moral Consequences. *Ann Emerg Med* 2009;**53**:605–11.  
25 doi:10.1016/j.annemergmed.2008.09.019  
26
- 27 4 Chiu I-M, Lin Y-R, Syue Y-J, *et al*. The influence of crowding on clinical practice in the  
28 emergency department. *Am J Emerg Med* Published Online First: 4 July 2017.  
29 doi:10.1016/j.ajem.2017.07.011  
30
- 31 5 Hwang U, Richardson LD, Sonuyi TO, *et al*. The effect of emergency department  
32 crowding on the management of pain in older adults with hip fracture. *J Am Geriatr Soc*  
33 2006;**54**:270–5. doi:10.1111/j.1532-5415.2005.00587.x  
34
- 35 6 Sprivulis PC, Da Silva J-A, Jacobs IG, *et al*. The association between hospital  
36 overcrowding and mortality among patients admitted via Western Australian  
37 emergency departments. *Med J Aust* 2006;**184**:208–12.  
38
- 39 7 Hoot NR, Aronsky D. Systematic review of emergency department crowding: causes,  
40 effects, and solutions. *Ann Emerg Med* 2008;**52**:126–36.  
41 doi:10.1016/j.annemergmed.2008.03.014  
42
- 43 8 Hoot NR, Zhou C, Jones I, *et al*. Measuring and forecasting emergency department  
44 crowding in real time. *Ann Emerg Med* 2007;**49**:747–55.  
45 doi:10.1016/j.annemergmed.2007.01.017  
46
- 47 9 Hoot N, Aronsky D. An Early Warning System for Overcrowding in the Emergency  
48 Department. *AMIA Annu Symp Proc* 2006;**2006**:339–43.  
49
- 50 10 Afilal M, Yalaoui F, Dugardin F, *et al*. Forecasting the Emergency Department Patients  
51 Flow. *J Med Syst* 2016;**40**:175. doi:10.1007/s10916-016-0527-0  
52  
53  
54  
55  
56  
57  
58  
59  
60



- 11 Carr BG, Kaye AJ, Wiebe DJ, *et al.* Emergency department length of stay: a major risk factor for pneumonia in intubated blunt trauma patients. *J Trauma* 2007;**63**:9–12. doi:10.1097/TA.0b013e31805d8f6b
- 12 Diercks DB, Roe MT, Chen AY, *et al.* Prolonged emergency department stays of non-ST-segment-elevation myocardial infarction patients are associated with worse adherence to the American College of Cardiology/American Heart Association guidelines for management and increased adverse events. *Ann Emerg Med* 2007;**50**:489–96. doi:10.1016/j.annemergmed.2007.03.033
- 13 Chalfin DB, Trzeciak S, Likourezos A, *et al.* Impact of delayed transfer of critically ill patients from the emergency department to the intensive care unit. *Crit Care Med* 2007;**35**:1477–83. doi:10.1097/01.CCM.0000266585.74905.5A
- 14 Bernstein SL, Aronsky D, Duseja R, *et al.* The effect of emergency department crowding on clinically oriented outcomes. *Acad Emerg Med Off J Soc Acad Emerg Med* 2009;**16**:1–10. doi:10.1111/j.1553-2712.2008.00295.x
- 15 Guttman A, Schull MJ, Vermeulen MJ, *et al.* Association between waiting times and short term mortality and hospital admission after departure from emergency department: population based cohort study from Ontario, Canada. *BMJ* 2011;**342**:d2983. doi:10.1136/bmj.d2983
- 16 Bayley MD, Schwartz JS, Shofer FS, *et al.* The financial burden of emergency department congestion and hospital crowding for chest pain patients awaiting admission. *Ann Emerg Med* 2005;**45**:110–7. doi:10.1016/j.annemergmed.2004.09.010
- 17 Jarvis PRE. Improving emergency department patient flow. *Clin Exp Emerg Med* 2016;**3**:63–8. doi:10.15441/ceem.16.127
- 18 Le Spégnane D, Cauterman M. *Rapport de fin de mission « Temps d'attente et de passage aux Urgences »*. Juillet 2003 – mars 2005. Paris: : Mission Nationale d'Expertise et d'Audit Hospitaliers 2005.
- 19 McD Taylor D, Bennett DM, Cameron PA. A paradigm shift in the nature of care provision in emergency departments. *Emerg Med J EMJ* 2004;**21**:681–4. doi:10.1136/emj.2004.017640
- 20 Kilic YA, Agalar FA, Kunt M, *et al.* Prospective, double-blind, comparative fast-tracking trial in an academic emergency department during a period of limited resources. *Eur J Emerg Med Off J Eur Soc Emerg Med* 1998;**5**:403–6.
- 21 Fitzgerald K, Pelletier L, Reznek MA. A Queue-Based Monte Carlo Analysis to Support Decision Making for Implementation of an Emergency Department Fast Track. *J Healthc Eng* 2017;**2017**:1–8. doi:10.1155/2017/6536523
- 22 Cooke M, Wilson S, Pearson S. The effect of a separate stream for minor injuries on accident and emergency department waiting times. *Emerg Med J EMJ* 2002;**19**:28–30. doi:10.1136/emj.19.1.28

- 1  
2  
3 23 Rogers T, Ross N, Spooner D. Evaluation of a 'see and treat' pilot study introduced to an  
4 emergency department. *Accid Emerg Nurs* 2004;**12**:24–7.  
5 doi:10.1016/j.aaen.2003.08.005  
6  
7  
8 24 Ardagh MW, Wells JE, Cooper K, *et al.* Effect of a rapid assessment clinic on the waiting  
9 time to be seen by a doctor and the time spent in the department, for patients  
10 presenting to an urban emergency department: a controlled prospective trial. *N Z Med J*  
11 2002;**115**:U28.  
12  
13  
14 25 Kwa P, Blake D. Fast track: has it changed patient care in the emergency department?  
15 *Emerg Med Australas EMA* 2008;**20**:10–5. doi:10.1111/j.1742-6723.2007.01021.x  
16  
17  
18 26 Sanchez M, Smally AJ, Grant RJ, *et al.* Effects of a fast-track area on emergency  
19 department performance. *J Emerg Med* 2006;**31**:117–20.  
20 doi:10.1016/j.jemermed.2005.08.019  
21  
22  
23 27 Gill SD, Lane SE, Sheridan M, *et al.* Why do "fast track" patients stay more than four  
24 hours in the emergency department? An investigation of factors that predict length of  
25 stay. *Emerg Med Australas EMA* Published Online First: 23 March 2018.  
26 doi:10.1111/1742-6723.12964  
27  
28  
29 28 Khanna S, Boyle J, Good N, *et al.* New emergency department quality measure: from  
30 access block to National Emergency Access Target compliance. *Emerg Med Australas*  
31 *EMA* 2013;**25**:565–72. doi:10.1111/1742-6723.12139  
32  
33  
34 29 Forero R, McCarthy S, Hillman K. Access block and emergency department  
35 overcrowding. *Crit Care* 2011;**15**:216. doi:10.1186/cc9998  
36  
37  
38 30 Broccoli MC, Moresky R, Dixon J, *et al.* Defining quality indicators for emergency care  
39 delivery: findings of an expert consensus process by emergency care practitioners in  
40 Africa. *BMJ Glob Health* 2018;**3**:e000479. doi:10.1136/bmjgh-2017-000479  
41  
42  
43 31 Graham KL, Auerbach AD, Schnipper JL, *et al.* Preventability of Early Versus Late Hospital  
44 Readmissions in a National Cohort of General Medicine Patients. *Ann Intern Med*  
45 2018;**168**:766–74. doi:10.7326/M17-1724  
46  
47  
48 32 R Core Team (2016). R: A language and environment for statistical computing. R  
49 Foundation for Statistical Computing, Vienna, Austria. URL <https://www.R-project.org/>.  
50  
51  
52 33 Powell ES, Khare RK, Venkatesh AK, *et al.* The relationship between inpatient discharge  
53 timing and emergency department boarding. *J Emerg Med* 2012;**42**:186–96.  
54 doi:10.1016/j.jemermed.2010.06.028  
55  
56  
57 34 Considine J, Kropman M, Kelly E, *et al.* Effect of emergency department fast track on  
58 emergency department length of stay: a case-control study. *Emerg Med J EMJ*  
59 2008;**25**:815–9. doi:10.1136/emj.2008.057919  
60

- 1  
2  
3 35 Han JH, Zhou C, France DJ, *et al*. The effect of emergency department expansion on  
4 emergency department overcrowding. *Acad Emerg Med Off J Soc Acad Emerg Med*  
5 2007;**14**:338–43. doi:10.1197/j.aem.2006.12.005  
6  
7  
8 36 Asplin BR, Magid DJ, Rhodes KV, *et al*. A conceptual model of emergency department  
9 crowding. *Ann Emerg Med* 2003;**42**:173–80. doi:10.1067/mem.2003.302  
10  
11 37 Walley P. Designing the accident and emergency system: lessons from manufacturing.  
12 *Emerg Med J EMJ* 2003;**20**:126–30.  
13  
14 38 Kaushal A, Zhao Y, Peng Q, *et al*. Evaluation of fast track strategies using agent-based  
15 simulation modeling to reduce waiting time in a hospital emergency department.  
16 *Socioecon Plann Sci* 2015;**50**:18–31. doi:10.1016/j.seps.2015.02.002  
17  
18 39 Grouse AI, Bishop RO, Gerlach L, *et al*. A stream for complex, ambulant patients reduces  
19 crowding in an emergency department. *Emerg Med Australas EMA* 2014;**26**:164–9.  
20 doi:10.1111/1742-6723.12204  
21  
22 40 Cameron PA, Joseph AP, McCarthy SM. Access block can be managed. *Med J Aust*  
23 2009;**190**:364–8.  
24  
25 41 Kelen GD, Scheulen JJ, Hill PM. Effect of an emergency department (ED) managed acute  
26 care unit on ED overcrowding and emergency medical services diversion. *Acad Emerg*  
27 *Med Off J Soc Acad Emerg Med* 2001;**8**:1095–100.  
28  
29 42 Hoffenberg S, Hill MB, Houry D. Does sharing process differences reduce patient length  
30 of stay in the emergency department? *Ann Emerg Med* 2001;**38**:533–40.  
31 doi:10.1067/mem.2001.119426  
32  
33 43 Geller J, Janson P, McGovern E, *et al*. Loneliness as a predictor of hospital emergency  
34 department use. *J Fam Pract* 1999;**48**:801–4.  
35  
36 44 van Uden CJT, Winkens R, Wesseling G, *et al*. Use of out of hours services: a comparison  
37 between two organisations. *Emerg Med J EMJ* 2003;**20**:184–7.  
38 doi:10.1136/emj.20.2.184  
39  
40 45 Lombraill P, Vitoux-Brot C, Bourrillon A, *et al*. Another look at emergency room  
41 overcrowding: accessibility of the health services and quality of care. *Int J Qual Health*  
42 *Care J Int Soc Qual Health Care* 1997;**9**:225–35.  
43  
44 46 Hansagi H, Edhag O, Allebeck P. High consumers of health care in emergency units: how  
45 to improve their quality of care. *Qual Assur Health Care Off J Int Soc Qual Assur Health*  
46 *Care* 1991;**3**:51–62.  
47  
48 47 Graber DJ, Ardagh MW, O'Donovan P, *et al*. A telephone advice line does not decrease  
49 the number of presentations to Christchurch Emergency Department, but does decrease  
50 the number of phone callers seeking advice. *N Z Med J* 2003;**116**:U495.  
51  
52  
53  
54  
55  
56  
57  
58  
59  
60

- 1  
2  
3 48 Cordell WH, Keene KK, Giles BK, *et al.* The high prevalence of pain in emergency medical  
4 care. *Am J Emerg Med* 2002;**20**:165–9.  
5  
6  
7 49 Lutze M, Ross M, Chu M, *et al.* Patient perceptions of emergency department fast track:  
8 a prospective pilot study comparing two models of care. *Australas Emerg Nurs J AENJ*  
9 2014;**17**:112–8. doi:10.1016/j.aenj.2014.05.001  
10  
11 50 Cohen L, Génisson C, Savary R-P. *Les urgences hospitalières: miroir des*  
12 *dysfonctionnements du système de santé*. Paris: : Comission des Affaires Sociales sur les  
13 Urgences Hospitalières 2017.  
14  
15  
16 51 Combs S, Chapman R, Bushby A. Evaluation of Fast Track. *Accid Emerg Nurs* 2007;**15**:40–  
17 7. doi:10.1016/j.aaen.2006.07.006  
18  
19  
20 52 Gupta A, Allen LA, Bhatt DL, *et al.* Association of the Hospital Readmissions Reduction  
21 Program Implementation With Readmission and Mortality Outcomes in Heart Failure.  
22 *JAMA Cardiol* 2018;**3**:44–53. doi:10.1001/jamacardio.2017.4265  
23  
24 53 Singh S, Lin Y-L, Nattinger AB, *et al.* Variation in Readmission Rates by Emergency  
25 Departments and Emergency Department Providers Caring for Patients After Discharge.  
26 *J Hosp Med* 2015;**10**:705–10. doi:10.1002/jhm.2407  
27  
28  
29 54 McIlvennan CK, Eapen ZJ, Allen LA. Hospital readmissions reduction program. *Circulation*  
30 2015;**131**:1796–803. doi:10.1161/CIRCULATIONAHA.114.010270  
31  
32  
33  
34  
35  
36  
37  
38  
39  
40  
41  
42  
43  
44  
45  
46  
47  
48  
49  
50  
51  
52  
53  
54  
55  
56  
57  
58  
59  
60

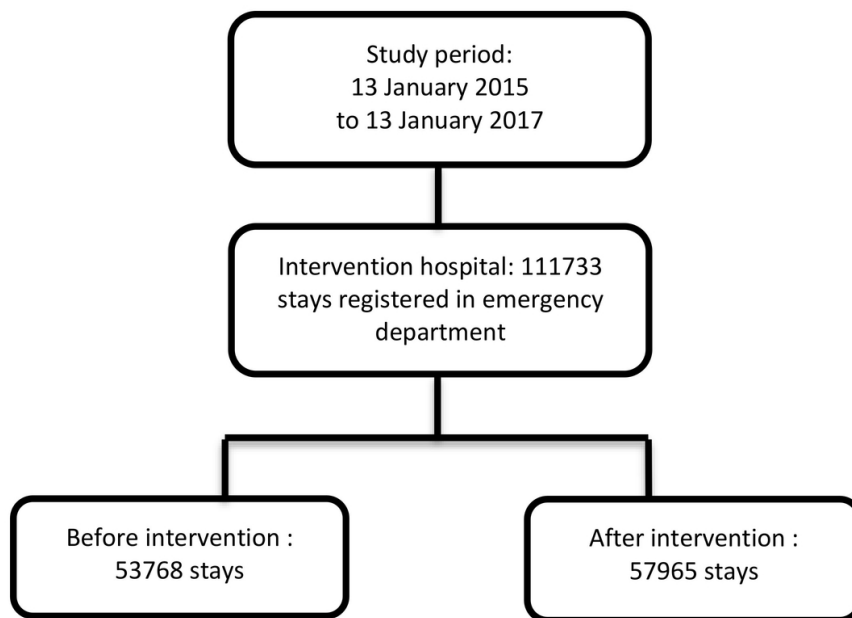

Flowchart

104x77mm (300 x 300 DPI)

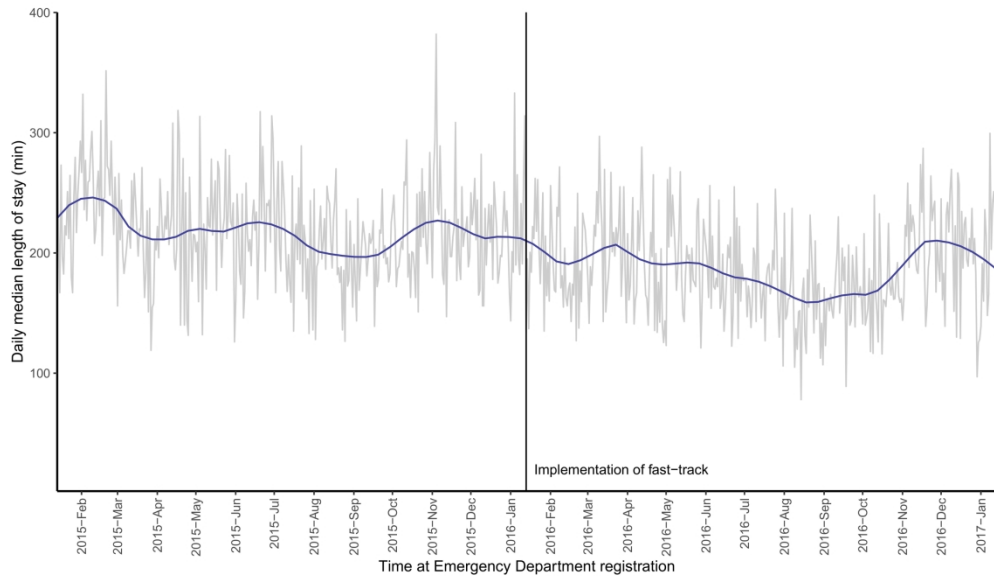

Daily median emergency department length of stay during the study period (trends obtained by locally weighted regression).

254x152mm (300 x 300 DPI)

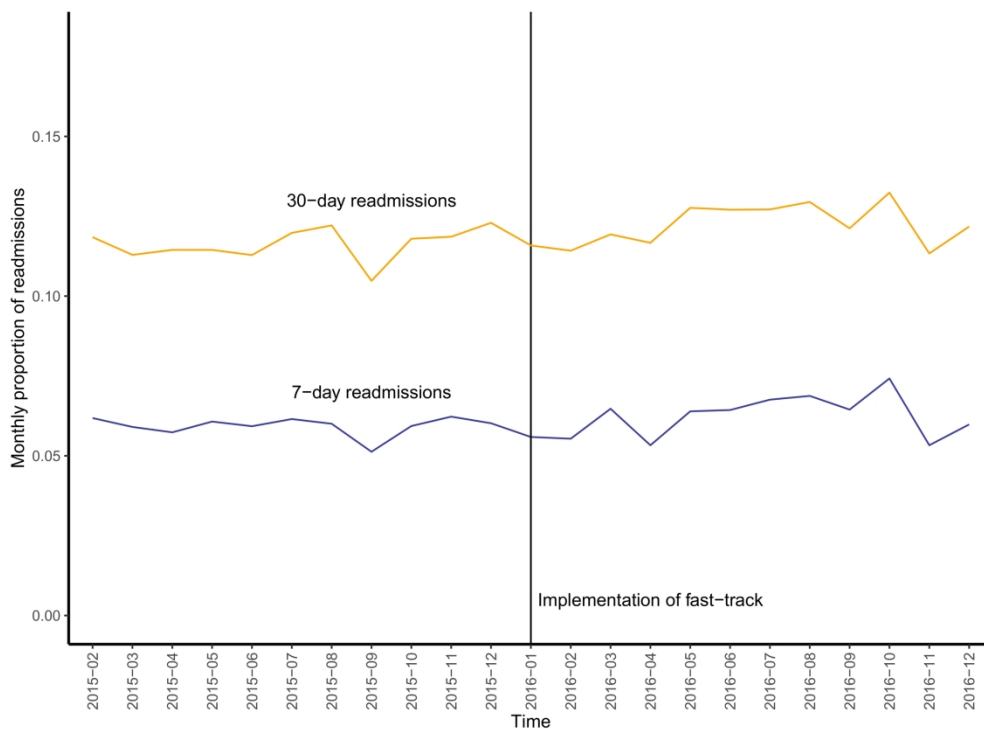

Proportion of emergency department 7-day and 30-day readmissions during the study period

215x165mm (300 x 300 DPI)

**SUPPLEMENTARY APPENDIX 1: Emergency department fast-track admission criteria****Exclusion criteria**

- Disabled patients or patients with reduced autonomy
- Age > 65 years
- Pain on visual analogic scale  $\geq$  8/10

**Triage**

If the answer to all following questions is no, the patient can be managed in the fast-track:

- Need to undress the patient for assessment/treatment
- The patient needs to be in supine position
- Need for blood sampling
- The patient needs a wound suture with expected duration of > 20 min

**Trauma patients managed in the fast-track**

- Trauma not requiring major analgesics
- Contusions and benign trauma, for patients WITHOUT anticoagulant medication
- Cranial trauma without initial loss of consciousness
- Minor wounds, except on tongue, eye, or scalp
- Abscess, minor subcutaneous tissue infection, subcutaneous foreign body
- Minor burn injuries except on face
- Wound management

**Medical patients managed in the fast-track****Gastro-enterology**

- Foreign body ingestion
- Constipation/diarrhea
- Acid reflux disease

**Ophtalmology**

- Ocular foreign body
- Conjunctivitis
- Palpebral infection

**Urology**

- Uncomplicated lower urinary tract infections



1  
2  
3 **Oto-rhino-laryngology**  
4

- 5 - Epistaxis  
6  
7 - Ear pain  
8  
9 - Dental abscess

10 **Dermatology**  
11

- 12 - Skin rash  
13  
14 - Benign skin disease without fever  
15  
16 - Insect bites  
17

18 **Others**  
19

- 20 - Urgent local drugs administration (e.g. intracavernous phenylephrine)  
21  
22  
23  
24  
25  
26  
27  
28  
29  
30  
31  
32  
33  
34  
35  
36  
37  
38  
39  
40  
41  
42  
43  
44  
45  
46  
47  
48  
49  
50  
51  
52  
53  
54  
55  
56  
57  
58  
59  
60

**STROBE 2007 (v4) Statement—Checklist of items that should be included in reports of *cohort studies***

| Section/Topic                | Item # | Recommendation                                                                                                                                                                       | Reported on page # |
|------------------------------|--------|--------------------------------------------------------------------------------------------------------------------------------------------------------------------------------------|--------------------|
| <b>Title and abstract</b>    | 1      | (a) Indicate the study's design with a commonly used term in the title or the abstract                                                                                               | 1                  |
|                              |        | (b) Provide in the abstract an informative and balanced summary of what was done and what was found                                                                                  | 1                  |
| <b>Introduction</b>          |        |                                                                                                                                                                                      |                    |
| Background/rationale         | 2      | Explain the scientific background and rationale for the investigation being reported                                                                                                 | 2                  |
| Objectives                   | 3      | State specific objectives, including any prespecified hypotheses                                                                                                                     | 3                  |
| <b>Methods</b>               |        |                                                                                                                                                                                      |                    |
| Study design                 | 4      | Present key elements of study design early in the paper                                                                                                                              | 3                  |
| Setting                      | 5      | Describe the setting, locations, and relevant dates, including periods of recruitment, exposure, follow-up, and data collection                                                      | 4                  |
| Participants                 | 6      | (a) Give the eligibility criteria, and the sources and methods of selection of participants. Describe methods of follow-up                                                           | 4                  |
|                              |        | (b) For matched studies, give matching criteria and number of exposed and unexposed                                                                                                  | N/A                |
| Variables                    | 7      | Clearly define all outcomes, exposures, predictors, potential confounders, and effect modifiers. Give diagnostic criteria, if applicable                                             | 5                  |
| Data sources/<br>measurement | 8*     | For each variable of interest, give sources of data and details of methods of assessment (measurement). Describe comparability of assessment methods if there is more than one group | 5                  |
| Bias                         | 9      | Describe any efforts to address potential sources of bias                                                                                                                            | 6                  |
| Study size                   | 10     | Explain how the study size was arrived at                                                                                                                                            | 7                  |
| Quantitative variables       | 11     | Explain how quantitative variables were handled in the analyses. If applicable, describe which groupings were chosen and why                                                         | 6                  |
| Statistical methods          | 12     | (a) Describe all statistical methods, including those used to control for confounding                                                                                                | 6                  |
|                              |        | (b) Describe any methods used to examine subgroups and interactions                                                                                                                  | 6                  |
|                              |        | (c) Explain how missing data were addressed                                                                                                                                          | 7                  |
|                              |        | (d) If applicable, explain how loss to follow-up was addressed                                                                                                                       | N/A                |
|                              |        | (e) Describe any sensitivity analyses                                                                                                                                                | N/A                |
| <b>Results</b>               |        |                                                                                                                                                                                      | N/A                |

|                          |     |                                                                                                                                                                                                              |        |
|--------------------------|-----|--------------------------------------------------------------------------------------------------------------------------------------------------------------------------------------------------------------|--------|
| Participants             | 13* | (a) Report numbers of individuals at each stage of study—eg numbers potentially eligible, examined for eligibility, confirmed eligible, included in the study, completing follow-up, and analysed            | Fig. 1 |
|                          |     | (b) Give reasons for non-participation at each stage                                                                                                                                                         | N/A    |
|                          |     | (c) Consider use of a flow diagram                                                                                                                                                                           | Fig. 1 |
| Descriptive data         | 14* | (a) Give characteristics of study participants (eg demographic, clinical, social) and information on exposures and potential confounders                                                                     | 8      |
|                          |     | (b) Indicate number of participants with missing data for each variable of interest                                                                                                                          | Fig. 1 |
|                          |     | (c) Summarise follow-up time (eg, average and total amount)                                                                                                                                                  | N/A    |
| Outcome data             | 15* | Report numbers of outcome events or summary measures over time                                                                                                                                               | 8      |
| Main results             | 16  | (a) Give unadjusted estimates and, if applicable, confounder-adjusted estimates and their precision (eg, 95% confidence interval). Make clear which confounders were adjusted for and why they were included | 10     |
|                          |     | (b) Report category boundaries when continuous variables were categorized                                                                                                                                    | 5      |
|                          |     | (c) If relevant, consider translating estimates of relative risk into absolute risk for a meaningful time period                                                                                             | N/A    |
| Other analyses           | 17  | Report other analyses done—eg analyses of subgroups and interactions, and sensitivity analyses                                                                                                               | 6      |
| <b>Discussion</b>        |     |                                                                                                                                                                                                              |        |
| Key results              | 18  | Summarise key results with reference to study objectives                                                                                                                                                     | 11     |
| <b>Limitations</b>       |     |                                                                                                                                                                                                              |        |
| Interpretation           | 20  | Give a cautious overall interpretation of results considering objectives, limitations, multiplicity of analyses, results from similar studies, and other relevant evidence                                   | 15     |
| Generalisability         | 21  | Discuss the generalisability (external validity) of the study results                                                                                                                                        | 12     |
| <b>Other information</b> |     |                                                                                                                                                                                                              |        |
| Funding                  | 22  | Give the source of funding and the role of the funders for the present study and, if applicable, for the original study on which the present article is based                                                | 15     |

\*Give information separately for cases and controls in case-control studies and, if applicable, for exposed and unexposed groups in cohort and cross-sectional studies.

**Note:** An Explanation and Elaboration article discusses each checklist item and gives methodological background and published examples of transparent reporting. The STROBE checklist is best used in conjunction with this article (freely available on the Web sites of PLoS Medicine at <http://www.plosmedicine.org/>, Annals of Internal Medicine at <http://www.annals.org/>, and Epidemiology at <http://www.epidem.com/>). Information on the STROBE Initiative is available at [www.strobe-statement.org](http://www.strobe-statement.org).
