# Supplementary material for: Impact of the implementation of a fast-track on emergency department length of stay and quality of care indicators in the Champagne-Ardenne region: a before–after study
Source: PubMed Central journal article supplement — BMJ Open. 2019 Jun 19;9(6):e026200. doi: 10.1136/bmjopen-2018-026200 (PMC6588991; doi:10.1136/bmjopen-2018-026200), 2019-06-19
Supplement: bmjopen-2018-026200supp001.pdf [file bmjopen-2018-026200supp001.pdf]

## **SUPPLEMENTARY APPENDIX 1: Emergency department fast-track admission criteria**

### **Exclusion criteria**

- Disabled patients or patients with reduced autonomy
- Age > 65 years
- Pain on visual analogic scale  $\geq$  8/10

### **Triage**

If the answer to all following questions is no, the patient can be managed in the fast-track:

- Need to undress the patient for assessment/treatment
- The patient needs to be in supine position
- Need for blood sampling
- The patient needs a wound suture with expected duration of > 20 min

### **Trauma patients managed in the fast-track**

- Trauma not requiring major analgesics
- Contusions and benign trauma, for patients WITHOUT anticoagulant medication
- Cranial trauma without initial loss of consciousness
- Minor wounds, except on tongue, eye, or scalp
- Abscess, minor subcutaneous tissue infection, subcutaneous foreign body
- Minor burn injuries except on face
- Wound management

### **Medical patients managed in the fast-track**

#### **Gastro-enterology**

- Foreign body ingestion
- Constipation/diarrhea
- Acid reflux disease

#### **Ophtalmology**

- Ocular foreign body
- Conjunctivitis
- Palpebral infection

#### **Urology**

- Uncomplicated lower urinary tract infections

**Oto-rhino-laryngology**

- Epistaxis
- Ear pain
- Dental abscess

**Dermatology**

- Skin rash
- Benign skin disease without fever
- Insect bites

**Others**

- Urgent local drugs administration (e.g. intracavernous phenylephrine)
